1

1 Genetic mapping of flowering time and plant height in a maize Stiff Stalk MAGIC  
2 population

3 Kathryn J. Michel<sup>\*</sup>, Dayane C. Lima<sup>\*</sup>, Hope Hundley<sup>†</sup>, Vasanth Singan<sup>1 †</sup>, Yuko  
4 Yoshinaga<sup>†</sup>, Chris Daum<sup>†</sup>, Kerrie Barry<sup>†</sup>, Karl W. Broman<sup>‡</sup>, C. Robin Buell<sup>2 §, \*\*</sup>, Natalia  
5 de Leon<sup>\*, ††</sup>, Shawn M. Kaeppler<sup>\*, ††, §§</sup>

6 <sup>\*</sup> Department of Agronomy, University of Wisconsin – Madison, Madison, WI 53706

7 <sup>†</sup> U.S. Department of Energy Joint Genome Institute, Berkeley, California, 94720

8 <sup>‡</sup> Departments of Biostatistics and Medical Informatics, University of Wisconsin–  
9 Madison, WI 53706

10 <sup>§</sup> Department of Plant Biology, Michigan State University, East Lansing, MI 48824

11 <sup>\*\*</sup> Department of Energy Great Lakes Bioenergy Research Center, Michigan State  
12 University, East Lansing, MI 48824

13 <sup>††</sup> Department of Energy Great Lakes Bioenergy Research Center, University of  
14 Wisconsin – Madison, Madison, WI 53706

15 <sup>§§</sup> Wisconsin Crop Innovation Center, University of Wisconsin – Madison, Middleton WI  
16 53562

17 <sup>1</sup> Ambry Genetics, 1 Enterprise, Aliso Viejo, CA - 92656

18 <sup>2</sup> Center for Applied Genetic Technologies, Department of Crop and Soil Sciences,  
19 University of Georgia, Athens, GA 30602

2

20 Running Title: Maize Stiff Stalk MAGIC QTL mapping

21 Corresponding author:

22 Shawn Kaepler

23 1575 Linden Dr.

24 Madison, WI 53706

25 (608) 262-9571

26 smkaeppl@wisc.edu

27

28 **Core Ideas:**

29 A multi-parent advanced generation intercross (MAGIC) mapping population was

30 developed from six founder Stiff Stalk maize inbreds with commercial relevance.

31 Genetic mapping utilizing an update to R/qt12 was demonstrated for flowering and plant

32 height traits.

33 Genetic mapping using maize inbred and hybrid information was compared and

34 provided insight into trait expression in inbreds relative to heterotic testcross hybrids.

35

36 **Abbreviations:** BSSS, Iowa Stiff Stalk Synthetic; BLUE, best linear unbiased estimator;

37 DH, doubled haploid; ex-PVP, expired Plant Variety Protection; GWAS, genome wide

38 association study; MAGIC, multi-parent advanced generation intercross population;

39 PHG, Practical Haplotype Graph; PHI, Pioneer Hi-Bred, International; PVP, Plant

40 Variety Protection; QTL, quantitative trait locus or loci; SS, Stiff Stalk

41

42

## ABSTRACT

43 The Stiff Stalk heterotic pool is a foundation of US maize seed parent germplasm and  
44 has been heavily utilized by both public and private maize breeders since its inception in  
45 the 1930's. Flowering time and plant height are critical characteristics for both inbred  
46 parents and their test crossed hybrid progeny. To study these traits, a six parent  
47 multiparent advanced generation intercross (MAGIC) population was developed  
48 including maize inbred lines B73, B84, PHB47 (B37 type), LH145 (B14 type), PHJ40  
49 (novel early Stiff Stalk), and NKH8431 (B73/B14 type). A set of 779 doubled haploid  
50 lines were evaluated for flowering time and plant height in two field replicates in 2016  
51 and 2017, and a subset of 689 and 561 doubled haploid lines were crossed to two  
52 testers, respectively, and evaluated as hybrids in two locations in 2018 and 2019 using  
53 an incomplete block design. Markers were derived from a Practical Haplotype Graph  
54 built from the founder whole genome assemblies and genotype-by-sequencing and  
55 exome capture-based sequencing of the population. Genetic mapping utilizing an  
56 update to R/qtI2 revealed differing profiles of significant loci for both traits between 636  
57 of the DH lines and two sets of 571 and 472 derived hybrids. Genomic prediction was  
58 used to test the feasibility of predicting hybrid phenotypes based on the *per se* data.  
59 Predictive abilities were highest on direct models trained using the data they would  
60 predict (0.55 to 0.63), and indirect models trained using *per se* data to predict hybrid  
61 traits had slightly lower predictive abilities (0.49 to 0.55). Overall, this finding is  
62 consistent with the overlapping and non-overlapping significant QTL found within the  
63 *per se* and hybrid populations and suggests that selections for phenology traits can be  
64 made effectively on doubled haploid lines before hybrid data is available.

65 INTRODUCTION

66 Multi-parent mapping populations are an effective tool for discovering quantitative trait  
67 loci (QTL) in plant and animal species. Multi-parent advanced generation intercross  
68 (MAGIC) populations offer a powerful QTL mapping structure because intercrossing  
69 more than two parents increases genetic diversity while managing minor allele  
70 frequency and reducing haplotype length through recombination (reviewed in Scott et  
71 al., 2020). MAGIC populations have been used to successfully dissect the genetic  
72 control of complex traits in various plant species, including Arabidopsis (Kover et al.  
73 2009), maize (Dell'Acqua et al. 2015), rice (Ogawa et al. 2018), barley (Sannemann et  
74 al. 2015), wheat (Gardner et al. 2016), sorghum (Ongom and Ejeta 2018), tomato  
75 (Pascual et al. 2015), and cowpea (Huynh et al. 2018). Multi-parent populations balance  
76 the advantages and disadvantages of biparental mapping populations and association  
77 panels. Geneticists often rely on the cross of two individuals with contrasting  
78 phenotypes to generate a population of segregating individuals and then perform  
79 linkage analysis to associate genetic loci with the trait of interest. Recently, increased  
80 marker density due to technological advancements and rapidly declining genotyping  
81 costs allowed researchers to evaluate diverse association panels to assay historical  
82 recombination to find associations between markers and phenotypes (reviewed in Tibbs  
83 Cortes *et al.* 2021). Despite the success of these methods, both techniques face  
84 intrinsic challenges. Biparental populations rely on the genetic diversity found in just two  
85 parents, which can limit the scope of discovered QTLs to the backgrounds studied.  
86 Association panels often contain rare alleles that do not meet the minor allele frequency  
87 threshold and are discarded due to low statistical power associated with such rarity.



88 Thus, MAGIC populations seek to balance these characteristics by incorporating more  
89 than two genetic backgrounds while balancing minor allele frequency and increasing  
90 mapping resolution.

91 To study the genetic architecture of traits relevant to maize hybrid performance and  
92 adaptation, we developed a MAGIC population from six inbred lines spanning the  
93 diversity of the Stiff Stalk heterotic pool. The Stiff Stalk heterotic group was founded in  
94 the Iowa Stiff Stalk Synthetic (BSSS) breeding population, which was initiated during the  
95 1930's by Dr. George Sprague to improve stalk quality, yield, and agronomic quality of  
96 maize inbreds (Troyer 2004). Several key inbreds were released out of BSSS, including  
97 B14 in 1953, B37 in 1958, B73 in 1972, and B84 in 1979 (Russell 1972; Russell 1979;  
98 Troyer 1999). Since their release, these founder BSSS inbreds have been used  
99 extensively by breeders in the public and private sectors in the United States, and the  
100 Stiff Stalk group has become the *de facto* source of seed parent germplasm for many  
101 hybrid breeding programs. It is estimated that B73, B14, and B37 contributed  
102 conservatively 16.4% to germplasm released by Monsanto Company, Pioneer Hi-Bred,  
103 International, and Syngenta between 2004-2008 (Mikel 2011). In a group of 1,506 lines  
104 released under Plant Variety Protection (PVP) certificates between the year 2000 and  
105 2019, researchers found that a third of the lines had kinship estimated Stiff Stalk  
106 admixture greater than 30%, and 15% of lines had Stiff Stalk admixture greater than  
107 50% (White et al. 2020). Thus, the Stiff Stalk heterotic group remains a vital source of  
108 commercial maize germplasm in North America. This research utilized six Stiff Stalk  
109 inbreds - B73, B84, NKH8431, LH145, PHB47, and PHJ40 – that represent key  
110 founders in commercial breeding programs. Recent work reported the genome

111 sequences of these inbreds (excluding B73) and found extensive genomic variation  
112 between B73 and the other five parents along with conservation of base BSSS  
113 haplotypes within each inbred (Bornowski et al. 2021).

114 Throughout the process of developing new inbred lines and hybrid varieties, maize  
115 breeders balance selecting for hybrid yield with other traits needed for successful inbred  
116 and hybrid seed production. Traits such as flowering time and plant height are vital to  
117 the success of an inbred within the breeding program and as a parent to a successful  
118 hybrid variety. Extensive research has been conducted on maize flowering time,  
119 including the discovery of a multitude of small to large effect QTL contributing to  
120 flowering time and photoperiod sensitivity variation in maize (Buckler et al. 2009; Xu et  
121 al. 2012; Wang et al. 2021) and the identification of several genes and regulatory  
122 elements involved in the pathway, including *ID1*, *DLF1*, *ZmCCA1*, *ZmMADS1*,  
123 *ZmCOL3*, *Vgt1*, *ZCN8*, *ZmCCT*, *ZmCCT9*, *ZmCCT10*, and *ZmMADS69* (Colasanti et al.  
124 1998; Muszynski et al. 2006; Salvi et al. 2007; Wang et al. 2011; Hung et al. 2012; Alter  
125 et al. 2016; Jin et al. 2018; Huang et al. 2018; Guo et al. 2018; Liang et al. 2019;  
126 Stephenson et al. 2019). Flowering time and photoperiod sensitivity are determinants of  
127 maize yield because the combination leads to adaptation of maize lines to their intended  
128 environments, such that tropical lines with daylight sensitivity must undergo extensive  
129 selection for adaptation to succeed in northern regions that do not meet daylight needs  
130 of tropical plants (Xu et al. 2012). In addition, timing of flowering can influence the total  
131 length of time available for grain filling post flowering and the ability of a hybrid to  
132 mature within a frost-free seasonal interval. Within an environment, maize hybrids with  
133 full-season relative maturities often yield more than their shorter-season counterparts,

134 and timing of planting date to achieve flowering time before environment specific cutoffs  
135 is vital for maximizing yield potential (Baum et al. 2019). However, later-maturing  
136 varieties can face risk due to early frosts and susceptibility to seasonal drought effects  
137 (Duvick and Cassman 1999), therefore plant breeders need to carefully balance  
138 flowering time and total maturity to suit their target population of environments to  
139 maximize maize grain yield. In maize hybrid varieties, flowering time typically exhibits  
140 heterosis where the hybrid flowers sooner than the earlier of the two inbred parents, as  
141 demonstrated by a partial diallel of ex-PVP inbreds (Li et al. 2018) and an association  
142 panel of 302 diverse inbreds crossed to B73 (Flint-Garcia et al. 2009).

143 Like flowering time, substantial efforts have been devoted to understanding the genetic  
144 underpinnings of maize plant and ear height. Major mutations in the gibberellin and  
145 brassinosteroid pathways affecting height have been identified in addition to numerous  
146 QTL (reviewed by Salas Fernandez et al., 2009). Despite its high heritability, QTL  
147 affecting height tend to have very small effects, with the largest effect in the maize US-  
148 NAM population explaining 2.1 +/- 0.9% of the variation, which suggests that maize  
149 height follows an infinitesimal model of inheritance (Peiffer et al. 2014). In addition,  
150 identification of QTL can depend on environmental conditions such as drought and  
151 nutrient stress, which may reduce the relative proportion of additive genetic variance  
152 compared to genotype by environment and error variance (Cai et al. 2012; Wallace et  
153 al. 2016). In general, taller plants can face increased root and stalk lodging pressure  
154 due to the proportionally higher placement of the ear on the stalk, which increases the  
155 ear's leverage during wind events or disease pressure. During the Green Revolution,  
156 major yield gains were made in rice and wheat by decreasing overall plant height, which

157 reduced the risk of lodging under more intensive agricultural management (reviewed by  
158 Khush, 2001). Maize breeders consider height selection in both inbreds and hybrids, as  
159 lodging can make harvest difficult and inefficient for both seed parents and commercial  
160 varieties. Due to heterosis, the hybrid is usually taller than the taller of the two inbred  
161 parents, as shown in a partial diallel of ex-PVP inbreds (Li et al. 2018) and in an  
162 association panel of 302 diverse lines crossed to B73 (Flint-Garcia et al. 2009).

163 The main objectives of this work are to: i) report a MAGIC population based on the Stiff  
164 Stalk heterotic group and its associated genetic and phenotypic resources, ii) dissect  
165 the genetic architecture of flowering time and plant height within the *per se* population of  
166 DH lines and two test cross populations, and iii) perform genomic prediction to  
167 investigate the relationship between *per se* and hybrid phenotypes.

## 168 MATERIALS AND METHODS

169 **Population Development:** Inbreds B73, B84, NKH8431, LH145, PHB47, and PHJ40  
170 were chosen to represent the primary Stiff Stalk sub-heterotic groups (Table 1) (White  
171 et al. 2020). Biographical information for each line was obtained from the Germplasm  
172 Resource Information Network (GRIN) database ([npgsweb.ars-grin.gov](http://npgsweb.ars-grin.gov)). The inbreds  
173 B73 and B84 were released from the BSSS in cycles five and seven, respectively, and  
174 B84 contains resistance to *Helminthosporium turcicum* (“Ht” currently known as  
175 *Setosphaeria turcica*, common name Northern Corn Leaf Blight). Inbred LH145 was  
176 developed by Holden’s Foundation Seed, Inc. (acquired by Monsanto Company in  
177 1997) from the cross of A632Ht and CM105, both of which have B14 as a parent. Inbred  
178 NKH8431 was developed from one B73 derived line and two B14 derived lines by  
179 Northrup, King & Company. Inbreds PHB47 and PHJ40 were both released by Pioneer

180 Hi-Bred, International (PHI). Inbred PHB47 was made from a cross between B37 and  
181 SD105, with two backcrosses to B37 before inbred development. Inbred PHJ40 is an  
182 early flowering flint and Stiff Stalk line developed in Ontario, Canada, with previously  
183 demonstrated admixture with B37 (White et al., 2020). All inbred lines except B73  
184 previously underwent whole genome, reference guided assembly, which revealed  
185 extensive genetic and genomic diversity between the five lines and B73 (Bornowski et  
186 al. 2021).

187 Table 1. Origins of Stiff Stalk inbred lines

| <b>Line</b>                    | <b>Originator</b>                   | <b>Sub-heterotic group</b> | <b>PI number</b> |
|--------------------------------|-------------------------------------|----------------------------|------------------|
| B73                            | Iowa State University               | B73                        | PI 550473        |
| B84                            | Iowa State University               | B73                        | PI 608767        |
| LH145                          | Holden's Foundation Seed, Inc.      | B14                        | PI 600959        |
| NKH8431 (alias H8431, NPH8431) | Northrup, King & Company            | B14                        | PI 601610        |
| PHB47 (alias B47)              | Pioneer Hi-Bred International, Inc. | B37                        | PI 601009        |
| PHJ40                          | Pioneer Hi-Bred International, Inc. | Flint                      | PI 601321        |

188 Table 1 Sub-heterotic groupings from White et al., 2020

189 The population, named WI-SS-MAGIC, was initiated at the University of Wisconsin  
190 during summer 2008. The six parents were crossed in a half diallel. Next, every possible

191 F<sub>1</sub> hybrid combination cross was attempted, and seed was included in the subsequent  
192 balanced bulk to maintain equal representation of all parents and account for any failed  
193 crosses. In subsequent generations, plants from the population bulk were randomly  
194 intermated by designating each plant as a pollen parent or seed parent and using the  
195 individual only once for crossing. Balanced bulks were made after harvest of the first  
196 intermating and a subset of the population (hereafter “Subset A”) was sent for doubled  
197 haploid (DH) induction, provided as in-kind support by AgReliant Genetics. The  
198 remaining balanced bulk was randomly intermated for two additional generations and  
199 then sent for DH induction (hereafter “Subset B”). Individuals in Subset A were given  
200 coded names beginning with W10004 and numbered from 1 to N, where N is the  
201 number of individuals (i.e. W10004\_0001 through W10004\_04xx), and individuals in  
202 Subset B were named using W10004 and a number from 500 to 500+N, where N is the  
203 number of individuals returned (i.e. W10004\_0500 through W10004\_xxxx) (Table S1).

204 **Collection of *Per Se* DH Line Phenotypic Data:** A set of 779 DH lines was planted  
205 during summers 2016 and 2017 at the West Madison Agricultural Research Station in  
206 Verona, WI (Table S1). Subset A and Subset B groups were organized as subblocks  
207 within a randomized complete block (RCB) design with two replications. Parents were  
208 included as checks in both subblocks. Both trials were planted in fields that followed  
209 soybeans in the previous year and were managed with standard agronomic practices.  
210 Detailed information about planting dates and densities, soil types, and nutrient and  
211 pesticide management is presented in Supplemental Table 2. Three representative  
212 plants per plot were measured for plant and ear height. Plant height was measured as  
213 the height from the ground, in centimeters, to the collar of the flag leaf, while ear height

214 was the height, in centimeters, from the ground to the base of the node subtending the  
215 uppermost ear. Growing degree units to anthesis and silking were measured on a whole  
216 plot basis (AnthGDU and SilkGDU, respectively). Anthesis and silking were measured  
217 as the number of days from planting it took to observe approximately 50% of the plants  
218 in the plot to reach pollen shed and silk extrusion, respectively. Dates were converted to  
219 growing degree units using a base temperature of 50° F and maximum temperature of  
220 86° F (Pope 2008) using temperature data obtained from the weather station located at  
221 the University of Wisconsin (UW) West Madison Agricultural Research Station to  
222 standardize for differential daily heat unit accumulation across years. Since lines  
223 developed through doubled haploidy are expected to be genetically uniform, lines with  
224 observable phenotypic segregation were discarded. Severely lodged plants were not  
225 evaluated for height characteristics. To remove outlier data points, individual plant  
226 measurements were discarded if the ear height to plant height measurement ratio was  
227 less than 0.25 or greater than 0.75, and whole plot ear or plant height measurements  
228 were discarded if the within plot variance was greater than 500 cm<sup>2</sup>.

229 **Generation of Hybrids and Collection of Phenotypic Data:** Hybrid seed was  
230 produced by crossing the WI-SS-MAGIC population to PHJ89 and DKH3IIH6 (hereafter  
231 3IIH6). The hybrid populations were named SS-PHJ89 and SS-3IIH6. PHJ89 is an  
232 Oh43-type inbred line developed by Pioneer Hi-Bred (White et al. 2020). The inbred  
233 3IIH6 is an Iodent-type inbred line developed by DeKalb Genetics Corporation (acquired  
234 by Monsanto in 1998, now owned by Bayer AG) through selfing the F<sub>1</sub> Hybrid PHI3737  
235 (Dekalb Plant Genetics 1994). PHJ89 and 3IIH6 are related by pedigree through their  
236 founder PHG47, which is one of the two parents of PHJ89 and one of the parents of

237 hybrid variety PH3737 from which 3IIH6 was generated through selfing, so they are  
238 expected to contain regions of identity by descent (Pioneer Hi-Bred International Inc.  
239 1992; Mikel 2011). Hybrids were grown during summers 2018 and 2019 at the UW  
240 West Madison Agricultural Research Station in Verona, Wisconsin and at the UW  
241 Arlington Research Station in Arlington, WI. Hybrids were blocked by tester, and each  
242 block included at least five replicates each of two commercial hybrids (DKC50-08RIB  
243 and DKC54-38RIB) and two replicates of each respective population parent-tester  
244 combination, when seed was available. All trials were incompletely replicated, where  
245 each hybrid genotype was grown at least once in each experiment with a consistent  
246 random subset replicated a second time. A total of 689 SS-3IIH6 hybrids were grown, of  
247 which 316 were replicated, while a total of 561 SS-PHJ89 hybrids were grown, of which  
248 377 were replicated (Table S1). The same set of replicated and unreplicated lines were  
249 grown across years and locations, with unique plot randomizations for each year-  
250 location combination. Replicated hybrids were randomized among the unreplicated  
251 hybrids within their respective tester blocks. All trials were planted in fields that followed  
252 soybeans in the previous year and were managed with standard agronomic practices.  
253 Detailed information about planting dates and densities, soil types, and nutrient and  
254 pesticide management is presented in Table S2. Flowering time growing degree units  
255 were recorded in the same manner as previously described for the *per se* population  
256 using weather data obtained from each research station. Flowering time was recorded  
257 for all hybrid plots in West Madison and for approximately 36% and 33% percent of  
258 hybrid plots in Arlington in 2018 and 2019, respectively. Plant height and ear height  
259 were measured on three competitive plants per plot for all plots. Stand counts were



260 recorded manually, and plots were discarded if they contained fewer than twenty plants.  
261 The 2019 West Madison trial experienced extremely wet and cold germination  
262 conditions, which led to low stand counts for the SS-3IIH6 block. Only 19% and 38% of  
263 the plots had stands greater than 50 and 40 plants, respectively, which prompted us to  
264 discard the height data due to inconsistent interplant competition but keep flowering  
265 time data due to good correlations with flowering time from the previous year. To  
266 remove outlier data points, individual plant measurements were discarded if the ear  
267 height to plant height measurement ratio was less than 0.25 or greater than 0.75, and  
268 whole plot height measurements were discarded if the within plot variance was greater  
269 than 500 cm<sup>2</sup>. Plot average height measurements and flowering GDU measurements  
270 that were more than three standard deviations away from the experiment wide mean  
271 were discarded.

272 **Analysis of Phenotypic Data:** A two stage approach was taken to analyze plot mean  
273 phenotypic data (Table S3). In stage one, following the procedures of (Rogers et al.  
274 2021), linear mixed models were fit using R/ASReml version four (Butler et al. 2017;  
275 RCoreTeam 2018) for each population within each environment using genotype as a  
276 fixed effect and replicate as a random effect. Next, models were fit with all combinations  
277 of autoregressive first order (AR1) and IID residual covariance structures of the x and y  
278 grid coordinates of the plot locations to account for spatial variation. The model with the  
279 lowest Schwarz's Bayesian Information Criterion (BIC) (Schwarz 1978) was chosen to  
280 represent the environment, and the BLUEs and standard errors were extracted from the  
281 model (Table S4). Due to our incomplete block structure, the residual spatial  
282 correlations were restricted to  $-0.6 < r < 0.6$ . Any models with correlation outside this

283 range were reset to using no residual covariance structure. In stage two, genotypes  
284 were fit as fixed effects and environment and genotype by environment interaction  
285 terms were set as random effects. To weight the second stage analysis, the reciprocals  
286 of the first stage BLUE standard errors were carried forward, which represent the  
287 genotype by replication interactions, and the units variance was constrained to one.  
288 Within each experiment, any phenotypic BLUE that fell outside 2.5 times the  
289 interquartile range (IQR) was discarded as an outlier. Following the data cleaning  
290 described in the previous sections and the *post hoc* cleaning based on IQR, BLUEs  
291 were calculated for 730 DH lines, 658 SS-3IIH6 hybrids, and 535 SS-PHJ89 hybrids.  
292 Parental check lines were included in the analysis because they constitute the same  
293 population as the experimental lines, while commercial check hybrids were not included  
294 in the analysis. To estimate variance components and calculate heritability, the same  
295 model was used except genotype was set as a random effect. Heritability was  
296 calculated as follows (Cullis et al. 2006):

297 [1]  $h_{Cullis}^2 = 1 - PEV/2\sigma_g^2$

298 using the prediction error variance (PEV) and genetic variance ( $\sigma_g^2$ ) obtained from the  
299 stage two analysis. To compare phenotypic variances across populations, the squared  
300 coefficient of variation was calculated to correct for the differences in scale between *per*  
301 *se* and hybrid phenotypes (Falconer and Mackay 1989). Pearson correlations within and  
302 between phenotypes were calculated on trait BLUE values within and between the DH  
303 and two hybrid populations.

304 **Genetic Data**

305 **Sequencing Using Exome Capture:** Exome capture sequencing was performed on  
306 701 DH lines from the WI-SS-MAGIC (Table S1) using a custom capture design  
307 acquired from Roche Diagnostics Corporation (Indianapolis, IN). Probes were designed  
308 to target the 5' and 3' ends of the untranslated regions (UTRs) of the maize  
309 B73\_RefGen\_v2 genic regions and presence absence variation (PAV) regions derived  
310 from alignment of whole genome sequencing reads of a core set of 32 inbreds to B73  
311 (Brohammer et al. 2018; Mazaheri et al. 2019). In total, 82,351 genic regions  
312 (approximately 26.5 Mb) and 492 PAV regions (approximately 2.8 Mb) of the maize  
313 genome were targeted using tiled, variable length probes, with an average probe size of  
314 75 nt (File S1). Any overlapping regions were collapsed into a single target. The target  
315 regions ranged in size from 50 to 49,777 nucleotides (nt), with a mean size of 353.6 nt  
316 (File S2). Briefly, DNA was extracted using seedling tissue using a modified CTAB  
317 method (Saghai-Marooof et al. 1984), sheared, and hybridized with adapters prior to  
318 SeqCap EZ solution capture, as previously described (Mascher et al. 2013) (File S3).  
319 DNA was then amplified, enrichment quality control performed, and libraries sequenced  
320 by the United States Department of Energy Joint Genome Institute (JGI) in paired end  
321 mode on the Illumina HiSeq 2500. Raw sequence quality was evaluated using FastQC  
322 v0.11.5 (<https://www.bioinformatics.babraham.ac.uk/projects/fastqc>) and MultiQC v1.0  
323 (Ewels et al. 2016). Reads were then trimmed, low quality bases removed, and  
324 adapters removed using Cutadapt v1.14 (Martin 2011) with the following parameters: --  
325 length 150, -m 20, -q 20, 20, --times 2, and -g/-a/-G/-A along with their respective  
326 adapter sequences. After cleaning, read quality and adapter content were evaluated  
327 again using FastQC v.0.11.5 and MultiQC v1.0.

328 **Genotyping By Sequencing:** Additional genotyping was performed on 144 DH lines  
329 using Genotyping-by-Sequencing (GBS) at the University of Wisconsin Biotechnology  
330 Center (Table S1). Briefly, dual digest GBS was performed with restriction enzymes *Pst*I  
331 and *Msp*I on frozen seedling leaf tissue (Elshire et al. 2011; Poland et al. 2012). DNA  
332 was sequenced using an Illumina NovaSeq6000 in paired end mode 150 nt and  
333 analyzed using bcl2fastq v2.20.0.422 (San Diego, CA, USA). Read one was  
334 demultiplexed and barcodes were removed using Tassel-5-Standalone plugin  
335 “ConvertOldFastqToModernFormatPlugin” with parameters “-e PstI-MspI” and “-p R1”  
336 (Bradbury et al. 2007). Read two was not included in future analysis.

337 **Practical Haplotype Graph:** A Practical Haplotype Graph (version 0.0.30) was built  
338 using B73 v5 as the reference (Bradbury et al. 2021, maizegdb.org). The B73  
339 RefGen\_v5 annotation of genes (Zm-B73-REFERENCE-NAM-5.0\_Zm00001eb.1.gff3,  
340 available at maizegdb.org) was used to make the initial reference ranges, which were  
341 supplied to the “CreateValidIntervalsFilePlugin” to collapse any overlapping ranges and  
342 format for input into PHG. B73 RefGen\_v5 was loaded as the reference assembly using  
343 the “MakeInitialPHGDBPipelinePlugin”, followed by the other five parental *de novo*  
344 genome assemblies using the “AssemblyHaplotypesMultiThreadPlugin” (Bornowski et  
345 al. 2021). The “AssemblyHaplotypesMultiThreadPlugin” uses mummer4 to align each  
346 assembly to the reference by chromosome in parallel (Marçais et al. 2018). Next, B73  
347 was added to the graph using the “AddRefRangeAsAssemblyPlugin” which allows B73  
348 haplotypes to be included as potential parental sequences.

349 A ranking file was generated by counting the number of haplotypes found within each  
350 assembly. The ranking file is necessary when two or more haplotypes are collapsed into

351 a consensus haplotype, where the sequence of the highest-ranking line will represent  
352 the group. Consensus haplotypes were made using the PHG shell script  
353 “CreateConsensi.sh” with parameters “mxDiv=0.0001” and “minTaxa=1”. All other  
354 parameters were left as default. The value of “mxDiv=0.0001” was chosen such that  
355 genic regions would only be collapsed if they were truly identical, since over 90% of  
356 maize gene models are shorter than 10,000 bp. After consensus haplotypes were  
357 generated, the “ImputePipelinePlugin” with parameter “-imputeTarget pathToVCF” was  
358 used to index the pangenome, map exome capture and GBS reads to the graph, use a  
359 Hidden Markov Model to find paths through the graph for each taxon, and call SNPs in  
360 the genic reference regions for the progeny population. Exome capture reads were  
361 aligned as paired end sequences, while the GBS reads were aligned as single end  
362 sequences. Parental assembly genic SNPs were extracted from the graph using the  
363 “FilterGraphPlugin” and “PathsToVCFPlugin”. Due to the expected homozygosity of the  
364 DH lines and parental assemblies, only homozygous SNPs were generated from the  
365 PHG.

366 Markers were filtered and selected for mapping using Tassel-5-Standalone (Bradbury et  
367 al. 2007). The combined file of parental and population individuals (File S4) was filtered  
368 to remove any non-Stiff Stalk individuals that were included as checks, SNPs with any  
369 missing parental data were removed, minor SNP states were set to missing to remove  
370 third, fourth and other alleles, and the SNP was removed if the minor allele frequency  
371 was less than 0.05. To reduce correlation between SNPs and decrease QTL mapping  
372 computational time, 100,000 evenly spaced SNPs were selected across the ten  
373 chromosomes and converted to numerical major or minor alleles.

374 **Population genetic characteristics:** Multidimensional scaling (MDS) was performed  
375 using 1.8 million unfiltered genic SNPs to confirm lack of population structure. A  
376 distance matrix was calculated using the “DistanceMatrixPlugin” from Tassel-5-  
377 Standalone with default parameters (Bradbury et al. 2007). In R, `cmdscale()` was used  
378 to calculate classical MDS on the distance matrix for the first two dimensions  
379 (RCoreTeam 2018). Allele frequencies were calculated on the set of 100,000 SNPs  
380 used for QTL mapping.

381 **QTL Mapping:** Quality control analyses, single-marker QTL mapping, and SNP  
382 associations were performed using R/`qtl2` with the cross-type corresponding to our  
383 mating design, “dh6” (Broman et al. 2019). Whenever individuals underwent both  
384 exome capture and GBS, the GBS reads were used to generate markers for QTL  
385 mapping. To prepare the data, a control file was created using the function  
386 `write_control_file()` from R/`qtl2`, which specifies the cross type for our population, the file  
387 names of the population and parental SNPs, the physical map coordinates for the  
388 SNPs, the phenotype file, the cross information file, which contains the number of  
389 meiosis used to generate each individual, and the parental alleles “AA” through “FF”.  
390 Due to the high density of markers, a genetic map was approximated by converting  
391 each SNP’s megabase pair position to centiMorgans using the B73 RefGen\_v5  
392 chromosomal genome length of 2132 Mbp divided by the composite US-NAM genetic  
393 map length of 1456.68 cM (Li et al. 2015). The control file and all materials needed for  
394 mapping are provided as Supplemental File S5.

395 Any line with segregating *per se* phenotypes had previously been removed from further  
396 analysis. To identify potential sample duplicates, the function `compare_genos()` was used

397 to calculate marker matching for all pairwise comparisons, and any pair of individuals  
398 with greater than 95% marker sharing was removed. Conditional genotype probabilities,  
399 or the true genotype underlying the observed markers, were calculated using a Hidden  
400 Markov Model (HMM) in the function `calc_genoprob()`, with an error probability of 0.01.  
401 (Broman and Sen 2009, Appendix D). After calculating genotype probabilities, the  
402 maximum marginal probability of the parental haplotypes was calculated and the total  
403 number of crossover events per individual was identified using the function `count_xo()`.  
404 Crossover locations were estimated using the function `locate_xo()`. Lines with unusually  
405 high numbers of total crossovers could be the result of sample contamination during  
406 population development or maintenance, as the HMM cannot accurately deduce the  
407 correct underlying parental haplotypes in non-parental regions, and instead frequently  
408 switches back and forth among the parent haplotypes. Lines in Subset A with more  
409 than 150 crossovers or lines in Subset B with more than 250 crossovers were removed  
410 from further analysis.

411 After quality control, 657 individuals remained with phenotypes and genotypes for  
412 mapping purposes (Table S1). The genotype probabilities were used to calculate a  
413 kinship matrix, so the analysis could account for the relatedness between individuals  
414 using the “leave one chromosome out” (LOCO) method, which uses a kinship matrix  
415 derived from all other chromosomes except the chromosome under study to allow for a  
416 random polygenic effect (Yang et al. 2014). Next, single marker analysis was performed  
417 using a linear mixed model with the kinship matrix as a covariate to find associations  
418 between genotype and phenotype. Log of odds (LOD) thresholds were determined as  
419 the 95th percentile LOD score after 1,000 permutations of the founder probabilities

420 using the function `scan1perm()` (Churchill and Doerge 1994; Cheng and Palmer 2013).  
421 Bayesian credible intervals for QTL peaks were calculated using the function  
422 `find_peaks()`, with LOD thresholds specific to each phenotype and probability of 0.95.  
423 To declare two QTL under one large peak, the LOD threshold was required to drop by  
424 at least five. Chromosome-wide QTL BLUP effects were calculated using the function  
425 `scan1blup()`, and single locus BLUP effects were estimated using `fit1()` with “blup=T”.  
426 In addition to single marker QTL mapping, we also performed SNP association using  
427 the R/qtl2 function `scan1snps()`, with the same kinship matrix as previously described  
428 provided to account for population structure. Finally, not all DH lines included in the *per*  
429 *se* mapping were used to make the hybrid populations. To account for this difference in  
430 sampling between the *per se* traits and the hybrid traits, the sets of DH lines included in  
431 each hybrid population were used to repeat the mapping and permutation procedures  
432 for each *per se* trait that corresponded to a hybrid trait.

433 **Genomic Prediction:** To test the correlation between *per se* and hybrid phenotype  
434 based on the DH population *per se* genetics, we performed genomic prediction using  
435 the 100,000 SNP markers used for QTL mapping. We used the package R/rrBLUP to  
436 perform ridge regression on the marker effects, which is equivalent to calculating  
437 genomic estimated breeding values using a realized relationship matrix (Hayes et al.  
438 2009; Endelman 2011). We used fivefold cross validation to train and test the models  
439 predicting *per se* and hybrid traits. We partitioned the phenotypic data into five  
440 segments and used four segments for training the model and the remaining portion for  
441 testing the model. We predicted the phenotypes for each of the five testing segments  
442 and calculated the correlation between the predicted and observed phenotypes, which



443 comprised one replication. We repeated this process 100 times for each of the  
444 phenotypes. To indirectly predict the hybrid phenotypes from the parental *per se*  
445 phenotypes, we calculated the correlation between the testing set predicted *per se*  
446 phenotypes and the observed hybrid phenotypes.

## 447 RESULTS

448 **Phenotypic variation:** Plant height and AnthGDU in the *per se* and hybrid populations  
449 showed normal distributions, and heritability ranged from 0.83 for SS-3IIH6 AnthGDU to  
450 0.89 for SS-PHJ89 AnthGDU (Figure 1, Table S5). The genetic variance for *per se*, SS-  
451 3IIH6, and SS-PHJ89 AnthGDU was 2781.6 GDU<sup>2</sup>, 1148.6 GDU<sup>2</sup>, and 944.3 GDU<sup>2</sup>,  
452 respectively, while the genetic variance for *per se*, SS-3IIH6, and SS-PHJ89 plant  
453 height was 386.3 cm<sup>2</sup>, 150.1 cm<sup>2</sup>, and 144.6 cm<sup>2</sup>, respectively. Similarly, the squared  
454 coefficient of variation for *per se*, SS-3IIH6, and SS-PHJ89 AnthGDU was 18.00, 9.24,  
455 and 7.33, while the squared coefficient of variation for *per se*, SS-3IIH6, and SS-PHJ89  
456 PH was 124.93, 26.79, and 22.35, respectively. All traits except *per se* and SS-PHJ89  
457 AnthGDU exhibit transgressive segregation, where one or more progeny DH lines have  
458 more extreme values than all the parents (Figure 1). The parental line PHJ40 was the  
459 earliest flowering individual in the *per se* and SS-PHJ89 experiment.

460 Anthesis and silking are highly correlated within both DH lines and hybrids, ranging  
461 between Pearson  $r=0.83$  for *per se* SilkGDU to *per se* AnthGDU to  $r=0.93$  for SS-3IIH6  
462 SilkGDU to AnthGDU (data not shown). The correlations between *per se* AnthGDU and  
463 SS-3IIH6 AnthGDU is  $r=0.64$  and *per se* AnthGDU to SS-PHJ89 AnthGDU is  $r=0.66$   
464 (Figure 2A and 2B). Correlation between AnthGDU for the two hybrid populations is  
465 higher at  $r=0.69$  (Figure 2C). Plant height and ear height are also highly correlated

466 within DH lines and hybrids. Correlations between plant height and ear height are  
467  $r=0.79$  within both the *per se* and SS-3IIH6 populations and  $r=0.83$  within the SS-PHJ89  
468 population (data not shown). *Per se* to hybrid plant height correlations are  $r=0.64$   
469 between DH lines and SS-3IIH6 and  $r=0.71$  between DH lines and SS- PHJ89 (Figure  
470 2D and 2E). Hybrid to hybrid plant height correlation is 0.72 (Figure 2F). The high  
471 correlation between hybrids is expected, due to both the highly additive nature of  
472 flowering time and height and the relatedness between testers 3IIH6 and PHJ89.

473 On average, the SS-3IIH6 population is 71.5 cm taller and sheds pollen 90.2 GDU  
474 earlier than its DH counterparts, and the SS-PHJ89 population is 82.0 cm taller and  
475 sheds pollen 101.1 GDU earlier than its DH founders. Finally, height and flowering are  
476 also correlated within populations, where  $r=0.35$ , 0.41, and 0.59 for the *per se*, SS-  
477 3IIH6, and SS-PHJ89 populations, respectively (Figure S1).

478 **Practical Haplotype Graph:** The 39,035 B73 RefGen\_v5 annotated gene models were  
479 used as initial reference ranges, and after collapsing overlapping ranges, 36,399 genic  
480 ranges remained, and 36,401 intergenic ranges were inserted between genic ranges for  
481 a total of 72,800 ranges. The average genic range width was 4755 bp, while the  
482 average intergenic range width was 53,811 bp. The theoretical maximum number of  
483 haplotypes per reference range is six, which represents either all inbreds having  
484 sequence that aligns to the reference (including reference to reference alignment), or  
485 five inbreds that have alignment with the reference and one with a missing haplotype.  
486 Not all assemblies have sequence that aligns to every range owing to structural  
487 variation between the parental genomes. Each parental assembly had different  
488 numbers of total haplotypes aligning to B73, from 51,070 haplotypes for PHJ40 to

489 66,890 for B84. PHJ40 is known to be more structurally diverse from the other founders  
490 (Bornowski et al. 2021), and the next lowest number of aligned haplotypes was 62,144  
491 for LH145. After collapsing haplotypes into consensus sequences, the average number  
492 of haplotypes per PHG reference range was reduced from 5.7 to 3.3 (Figure 3A).  
493 Identity by descent relationships are present between all of the lines due to their  
494 common heritage from the BSSS, and these relationships are strongest between B73  
495 and B84, B73 and NKH8431, and NKH8431 and LH145. Consensus parental and  
496 population haplotype identification numbers are presented in Table S6.

497 **Population genetic characteristics:** Multidimensional scaling (MDS) confirmed the  
498 lack of population structure within our population (Figure 3B). The parental inbred lines  
499 fall on the perimeter of the point cloud, with no discernable clustering of progeny  
500 individuals. Allele frequency distributions for the major and minor alleles appear as  
501 expected, with peaks near  $1/6$  and  $2/6$ , corresponding to private and two-way sharing of  
502 alleles within the parents, respectively (Figure 3C). The founder probabilities and the  
503 total number of observable crossovers were calculated using R/qtl2. The two population  
504 subsets have overlapping distributions for the total number of crossovers per individual.  
505 While examining the locations and total numbers of crossovers present within  
506 individuals, we found some areas of the genome in certain individuals contained  
507 unusually high numbers of crossovers. Such areas indicate that the Hidden Markov  
508 Model fails to choose a single founder for the area, and instead rapidly switches  
509 between founders. While some individuals had high total genome wide incidence of  
510 crossovers, which indicates a sample mix-up, some lines had isolated areas of high  
511 crossover in only a few regions. Small areas of high crossover could be caused by

512 several factors, including residual heterozygosity in the founder inbreds, introgression  
513 from the DH inducer (Li et al. 2009), contamination during population development from  
514 an inbred closely related to one of the founders, or technical issues during the SNP  
515 calling pipeline. In addition, using a PHG with imputation to generate SNPs for the  
516 population forces each individual to have haplotypes only from the population founders  
517 which complicates identifying areas of inducer introgression or contamination. Most  
518 importantly, QTL mapping results did not change significantly between the raw, full set  
519 of lines and the cleaned, reduced set of lines filtered for high total crossovers (150  
520 crossovers for Subset A, 250 crossovers for Subset B), indicating that our results are  
521 robust to this low level of uncertainty.

522 After removing individuals with high numbers of total crossovers, the Subset A (three  
523 total meioses to generate DH lines) has an average of 60 crossovers, while Subset B  
524 (five total meioses to generate DH lines) has an average of 101 crossovers (Figure 3D).  
525 The parental haplotypes for a set of eight population individuals reveal a mosaic of the  
526 founder genotypes (Figure S2). The top row of individuals belongs to the Subset A and  
527 show longer parental haplotypes than the bottom row of individuals, which belong to  
528 Subset B. In many individuals, there are chromosome sections plotted in white, which  
529 correspond to areas where the founder probabilities do not rise above 0.5. This is  
530 expected, due to the related nature of the population founders and the segments of  
531 identity by descent between them. For example, large stretches of identity by descent  
532 between B73 and B84 due to their selection out of the BSSS would make assigning  
533 population haplotypes to either of the parents difficult, and this issue is compounded by  
534 the presence of BSSS lines in the pedigrees of the other population parents. After

535 removing individuals with high crossovers, some regions of local high crossover  
536 frequency remain, potentially due to introgression from the DH inducer which has been  
537 previously observed (Li et al. 2009) or possible factors such as residual heterozygosity  
538 in founder inbreds.

### 539 **QTL Mapping**

540 **QTL Mapping and SNP Association:** To analyze flowering time and plant height, we  
541 took both a linkage mapping and SNP association approach. Linkage mapping relies on  
542 linear regression of the phenotypes on the matrix of founder probabilities, while SNP  
543 association regresses the phenotypes on the biallelic marker states. We found high  
544 concordance between linkage mapping and association analysis, where the most  
545 significant loci were identified for all traits by both approaches (Figures S3 and S4).  
546 Thus, we will refer to the linkage mapping results to represent our findings.

547 **Flowering Time:** Mapping for AnthGDU revealed several significant peaks across the  
548 ten chromosomes in the WI-SS-MAGIC DH population (Figure 4A, Figure S5). The most  
549 significant peaks appear on chromosome three at 156.3 and 163.1 Mbp and  
550 chromosome eight at 127.9 Mbp (Table S7). Peaks for anthesis and silking highly  
551 colocalized, which is expected due to the high correlation of the phenotypic values at  
552  $r=0.83$  (Figure S3). Several of the significant loci are near the location of other known  
553 flowering time genes. For example, chromosome three contains *ZmMADS69*, also  
554 known as *Zmm22*, and chromosome eight contains *ZmRap2.7* and *ZCN8*, as noted on  
555 Figure 4A. All three genes are known to regulate flowering time (Guo et al. 2018; Liang  
556 et al. 2019). Despite the high correlations between *per se* and hybrid flowering, several  
557 QTL that are significant in the *per se* population lose their significance in one or both

558 hybrid populations. The large peak on chromosome eight containing *ZmRap2.7* and  
559 *ZCN8* is not significant in the SS-PHJ89 population, despite retaining its significance in  
560 the group of DH lines used to make the hybrid population (Figure 4C). The same locus  
561 remains significant in the SS-3IIH6 population, albeit with a smaller LOD score (Figure  
562 4B). Loss of significance indicates a loss in variation, such that the tester may have a  
563 dominant allele that masks the variation within the DH population. This suggests that  
564 there are contrasting loci present between the two testers, where PHJ89 has a  
565 dominant locus relative to the *per se* population while 3IIH6 does not.

566 We calculated BLUP QTL effects for *per se* AnthGDU on chromosomes three and eight  
567 and found allelic series at the significant loci on both chromosomes (Figure 5). On  
568 chromosome three, PHB47 provides the early flowering allele and LH145 provides the  
569 late flowering allele, while on chromosome eight PHJ40 provides the early allele, and  
570 B73 and B84 provide later alleles. It is notable that LH145 is the second earliest parent  
571 of the population and PHB47 flowers near the mean of the population, demonstrating  
572 that alleles for early and late flowering segregate within the parents. Using a single QTL  
573 model to fit the BLUP effects for the chromosome three peak at 163,105,981 bp, the  
574 most extreme alleles from the parents show a -27.2 +/- 8.8 GDU effect for PHB47 and  
575 +22.6 +/- 8.9 GDU effect for LH145. For the peak on chromosome eight at 127,898,534  
576 bp, the most extreme effects are -24.5 +/- 8.9 GDU from PHJ40 and +17.1 +/- 8.9 GDU  
577 from B73.

578 **Plant Height:** Like flowering time, many significant peaks were also found for plant and  
579 ear height, such as on chromosomes one, two, three, and ten (Figure 6A, Figure S5,  
580 and Table S7). The most significant locus on chromosome one is located at 225.4 Mbp

581 and it contains *brd1*, a gene which is involved in the brassinosteroid pathway and for  
582 which a mutant allele causes severe dwarfism (Makarevitch et al. 2012). Likewise, the  
583 most significant locus on chromosome three at 8.9 Mbp contains another gene  
584 discovered through mutational studies, *DWARF1* (*d1*), which is involved in the  
585 gibberellin pathway (Chen et al. 2014). Fewer loci colocalized for plant and ear height  
586 compared to AnthGDU and SilkGDU (Figure S4). Most interestingly, a peak on  
587 chromosome six at 105.8 Mbp appears for plant height in the SS-3IIH6 population, but  
588 not in the SS-PHJ89 population (Figure 5B). This peak is near *ubi3*, previously found to  
589 be associated with height traits (Ding et al. 2016). Previous studies have identified an  
590 epistatic interaction between *ubi3* and *br2* (Xiao et al. 2021), so we investigated the  
591 parental effects of the peak on chromosome six at 105,826,214 bp for both hybrid  
592 populations and found that the LH145 allele had an effect of +3.5 +/- 1.7 cm, while the  
593 B73 allele had an effect of -4.7 +/- 2.0 cm in the SS-3IIH6 population (Figure S6). Here  
594 again, *per se* B73 is the tallest of the parents while *per se* LH145 is the second shortest  
595 and their allelic effects are opposite of their overall phenotypes, but their hybrid  
596 phenotypes are both closer to the population mean. For comparison, the insignificant  
597 chromosome six locus in the *per se* and SS-PHJ89 populations shows no such  
598 differentiation between the parents (Figure S5). The genetic variance for plant height in  
599 the SS-3IIH6 population was 151.1 cm<sup>2</sup>, so the allelic effects here are a small proportion  
600 of the total variance.

601 **Genomic Prediction:** Because information on the DH lines was available before hybrid  
602 test crosses were made, we tested the predictive abilities of several direct and indirect  
603 genomic prediction models (Figure 7). As expected, the most successful models were

604 those that were trained on the data that was most directly related to the predicted set,  
605 such as prediction within the hybrid SS-PHJ89 set and within the SS-3IIH6 set for plant  
606 height ( $r=0.63$  and  $r=0.60$ , respectively) and prediction within the *per se* set for anthesis  
607 ( $r=0.61$ ). Predictive abilities between test cross populations were moderate, with  
608 AnthGDU predictive abilities for SS-3IIH6 to SS-PHJ89 and vice versa of  $r=0.55$  and  
609  $0.54$ , and plant height at  $0.57$  and  $0.53$ , respectively. The correlations of the indirect  
610 predictions of *per se* to hybrid phenotypes were lower, but still greater than  $r=0.48$ . It is  
611 important to note that correlations do not consider the difference in scale between the  
612 *per se* and hybrid populations and cannot account for the population mean heterotic  
613 effect on both flowering time and plant height between the populations. Finally, we  
614 wanted to test the feasibility of using predicted *per se* data to discard DH lines from our  
615 breeding program that either are too tall or flower too late for our environment. We  
616 compared the predicted *per se* AnthGDU and *per se* plant height values to their  
617 observed values, and colored DH lines based on their status in the top 15<sup>th</sup> percentile  
618 for either the predicted or observed value (Figure S7). We maintained this color scheme  
619 when plotting the DH line's observed hybrid values to assess the combination of  
620 genomic prediction ability and tester response. Overall, we found that the DH lines in  
621 the top 15<sup>th</sup> percentile for the predicted trait but not for the observed trait tended to be  
622 the DH lines that would make hybrids that are satisfactory to our breeding program's  
623 needs, while DH lines that were in the top 15<sup>th</sup> percentile of observed values tended to  
624 have higher hybrid values. These results are expected, especially considering the high  
625 correlations between *per se* and hybrid phenotypes and the lower predictive ability of  
626 the *per se* to hybrid models.



627  
628  
629  
630  
631  
632  
633  
634  
635  
636  
637  
638  
639  
640  
641  
642  
643  
644  
645  
646  
647  
648  
649

## DISCUSSION

**QTL mapping in multi-parent populations:** Several multi-parent populations have been developed in maize, including MAGIC populations from Italy and Spain (Dell'Acqua et al. 2015; Jiménez-Galindo et al. 2019), four-parent populations from China and the US (Ding et al. 2015; Mahan et al. 2018), and nested association mapping populations from the US, China, and Europe (Yu et al. 2008; Li et al. 2013; Bauer et al. 2013; Giraud et al. 2017). The existing MAGIC, US-NAM, and CN-NAM populations use a variety of inbreds that sample the diversity of maize genetics, and the European NAM populations focus on the Dent and Flint heterotic groups in addition to factorial crosses made between recombinant inbred lines. Our population concentrates the founders within the Stiff Stalk heterotic group. An advantage to focusing on the Stiff Stalk group is that maize breeding relies on recycling genetics within heterotic groups to make new parents and crossing parents between groups to make hybrids. In a factorial mating design between Flint and Dent multiparent populations, it was discovered that the majority of general combining ability QTL were specific to one heterotic group (Giraud et al. 2017; Seye et al. 2019). Thus, blending the genomes of parents within a single heterotic group versus across the diversity of maize creates a more applicable population to study the subset of alleles present within Stiff Stalk seed parent germplasm released in North America. Breeding based on heterotic groups is expected to drive diverging allele frequencies between groups and constraining our mapping population to a single heterotic group allows us to examine the effects of these alleles on agronomic and yield related traits within their intended context. Mixing multiple founders takes advantage of historical recombination in addition to recombination

650 introduced through population development. Multiple founders within a single population  
651 allows the study of allelic series at loci of interest, such as for AnthGDU on  
652 chromosomes eight and three (Figure 5).

653 **QTL mapping in the WI-SS-MAGIC:** Large efforts have been made by the plant  
654 research community to elucidate the control of complex traits such as flowering time  
655 and height. Our results confirm the previous findings of numerous authors, especially  
656 the candidate genes highlighted in Figures 4 and 6. Similar loci were found within the  
657 *per se* and hybrid populations, but there was variation between the populations,  
658 indicating that non-additive variation impacts the hybrid phenotypes (Supplemental  
659 Figure 5). For flowering time, the loss of significance of the QTL on chromosome eight  
660 indicates the PHJ89 tester has a completely dominant locus compared to the *per se*  
661 population and compared to the other tester, 3IIH6. Our results demonstrate that QTL  
662 detection depends on the genetics of the tester when mapping in hybrid populations.  
663 While it is possible that the absence of a signal in the hybrid population could be due to  
664 environmental or genotype by environment effects, the high heritabilities support the  
665 large role of genetic variation.

666 For plant height, a significant locus exists within the hybrid SS-3IIH6 population that is  
667 absent in the *per se* population, which could indicate an epistatic interaction between  
668 the tester and population genotypes. This locus has been previously described in the  
669 context of both inbred and hybrid populations (Ding et al. 2016; Xiao et al. 2021). Ding  
670 et al. (2016), used a near isogenic line from the US-NAM family B73 × Tzi8 crossed to  
671 B73 to finemap the QTL to 95-96 Mbp on chromosome six. Like our study, Xiao et al.  
672 (2021), found a plant height QTL near 95.8 Mbp on chromosome six within one test

673 cross population but not in the inbred population, and provides a schematic outlining the  
674 epistatic derepression uncovered by this locus. In theory, there is the potential to study  
675 epistasis between more than two founders within a MAGIC population. For the WI-SS-  
676 MAGIC population, comparing the founder states for two loci results in 36 total digenic  
677 classes. We separated our population into these classes for the two most significant loci  
678 for *per se* AnthGDU and found the mean number of individuals per class was 16.5, with  
679 a range of seven to 44 individuals (Supplementary Figure 8). Smaller population size in  
680 some of the sets exacerbates this issue of power. We repeated the procedure for the  
681 SS-3IIH6 plant height loci on chromosome one and six and found a mean of 11.0  
682 individuals per class, with a range of zero to 27, and nine classes have fewer than five  
683 observed individuals (Supplementary Figure 9). The limited number of observations per  
684 digenic class restricts the ability to statistically evaluate interaction between loci.

685 **QTL mapping in DH lines and hybrids:** Previous work in mapping QTL across testers  
686 has found high concordance between plant height QTL discovered in different test cross  
687 populations and minimal digenic epistasis, despite evidence for epistasis under  
688 generation means analysis (Lübberstedt et al. 1997; Melchinger et al. 1998). Tester  
689 relatedness also influences the ability to discover QTL, where a tester unrelated to the  
690 population uncovers QTL for additive traits more effectively than related testers  
691 (Frascaroli et al. 2009). Another study of a biparental RIL population crossed to four  
692 testers found that mapping the mean test cross height was sufficient to identify shared  
693 loci between testers (Austin et al. 2001). Recent work by Xiao et al. (2021), examining  
694 heterosis for over 42,000 hybrids generated by crossing 1428 multi-parent lines with 30  
695 testers found that epistasis plays a role in generating heterosis, contradicting previous

696 work demonstrating the low impact of epistasis (Hinze and Lamkey 2003; Mihaljevic et  
697 al. 2005).

698 We documented our population's response to two testers to better understand the  
699 heterotic effect of Iodent (3IIH6) and Oh43 (PHJ89) type testers on the WI-SS-MAGIC  
700 population. Understanding *per se* phenotypes requires mapping in an inbred population,  
701 while understanding an inbred's response to a tester requires evaluating and mapping  
702 traits in the hybrid population. We found the hybrid populations to have less than half  
703 the variation of the *per se* population, which could indicate that non-additive gene action  
704 is affecting the phenotypes. The interplay of dominant and recessive loci only manifests  
705 in the hybrid population, either creating or concealing phenotypic variation depending on  
706 the gene action of the trait. Our study found evidence for contrasting allelic states  
707 between the two testers in several regions of the genome based on disappearance and  
708 appearance of QTL, including a dominant locus for flowering time on chromosome eight  
709 in PHJ89 compared to 3IIH6, and a putatively epistatic locus revealed for plant height in  
710 3IIH6. Despite the strong positive correlation between the hybrid phenotypes, several  
711 loci were found in only one of the hybrid populations (Supplementary Figure 5). Perfect  
712 correlation between the test cross phenotypes would lead to the discovery of the same  
713 QTL between the two populations, yet the deviation from a one-to-one relationship  
714 between the test cross phenotypes leads to the discovery of unique QTL in the hybrid  
715 populations. Choice of tester influences hybrid performance and QTL mapping results,  
716 as evidenced by studies previously described and our findings. Despite the high  
717 correlation between the phenotypes of the hybrid populations and the expected identity

718 by descent between the two testers, unique QTL were discovered for each trait in each  
719 population.

720 **Genomic prediction of hybrid phenotypes:** In maize breeding programs, *per se*  
721 phenotypes are often available before hybrid varieties can be tested. Using *per se* and  
722 hybrid data from our study, we investigated the association between *per se* and hybrid  
723 flowering and height traits. We wanted to test the feasibility of predicting correlations of  
724 hybrid flowering time and height based on DH line measurements for the purposes of  
725 discarding lines that flower too late or are too tall for our breeding program. We also  
726 wanted to evaluate the predictive ability between the two hybrid populations as breeding  
727 programs often use multiple testers as materials advance through selection pipelines.

728 We found that the hybrids flowered earlier and were taller than their maternal DH  
729 parents, confirming heterotic relationships for flowering and height found in other  
730 studies (Flint-Garcia et al. 2009; Li et al. 2018). Previous studies have found increased  
731 predictive abilities when incorporating parental inbred information (Liang et al. 2018;  
732 Jarquin et al. 2020), and we also found moderate prediction abilities for hybrid flowering  
733 time and plant height when the models were trained using the *per se* data. As expected,  
734 the models with the highest predictive abilities were those that were trained on the data  
735 they were designed to predict, although we achieved predictive abilities between  $r=0.49$   
736 and  $r=0.55$  for models predicting hybrid traits that were trained with *per se* data.

737 Correlations between *per se* and hybrid populations do not consider the difference in  
738 magnitude between them, such as the average difference between *per se* and hybrid  
739 flowering of 90 GDU or difference in height of 71 cm. Heterosis due to small genome-  
740 wide effects produces a relatively uniform incremental decrease in flowering time and

741 increase in height across all lines, while variation within inbreds and within hybrids is  
742 largely due to similar large effect QTL likely in combination with undetected small effect  
743 loci. These findings are consistent with the overlapping and non-overlapping QTL that  
744 were found between the *per se* and hybrid populations because the difference between  
745 the predictive abilities for direct and *per se* to hybrid models cannot account for the  
746 dominance or epistatic effect of the tester at individual loci. In addition, the masking of  
747 *per se* QTLs within either of the hybrid populations is conceptually consistent with the  
748 lowered predictive ability of using *per se* data to predict hybrids. We also found that the  
749 errors between predicted and observed *per se* phenotypes were a source of selection  
750 error that led to discarding DH lines that would have generated acceptable hybrids.

751 Finally, we also used the highest associated SNP from each LOD peak as fixed effects  
752 in the genomic prediction model but found that including the fixed marker effects  
753 lowered the predictive ability compared to using only the realized relationship matrix  
754 (data not shown). This finding supports previously simulated results demonstrating that  
755 known genes are only beneficial to models when they are few in number and explain  
756 large proportions of the variance (Bernardo 2014).

757 **Relevance to maize breeding:** This method has applications in maize breeding  
758 because genomic prediction could be used to make selections prior to generating test  
759 cross seed for an entire population. Alternatively, a smaller subset of an inbred  
760 population could be grown as a model training set with several testers prior to  
761 generating larger hybrid populations. Genomic prediction could then be used to discard  
762 the poorest performing lines, which would increase genetic gain by increasing the  
763 selection intensity on the population. Overall, our results indicate that plant breeders

764 should be less aggressive when using predicted *per se* data to predict hybrid  
765 performance because the errors in genomic prediction can lead to discarding hybrid  
766 lines incorrectly. Plant breeders must balance their selection for maize yield with the  
767 adaptation requirements and architectural risk for root or stalk lodging when developing  
768 new inbred lines, as demonstrated by including information for flowering time and plant  
769 height in this study. Flowering time and moisture at harvest are also indications of  
770 overall relative maturity, which is an important characteristic that plant breeders use to  
771 place varieties across geographies and that farmers use to balance risk and make  
772 planting time and cultivar decisions. Our results indicate that flowering time and height  
773 have high correlations between DH lines and hybrids within these DH line-tester  
774 combinations yet experience different profiles of QTL significance across the genome.  
775 While the goal of maize breeding efforts is to increase or protect hybrid yield, most  
776 genetic research efforts focus on using inbreds to study complex traits. Understanding  
777 how traits manifest in a parental inbred versus its hybrid progeny is a critical area of  
778 maize breeding and quantitative genetics research. For example, parental *per se*  
779 measures of grain yield have been previously used to increase prediction ability of  
780 hybrid performance (Schrag et al. 2010). Deviations from the purely additive relationship  
781 of inbred flowering time or plant height to hybrid phenotype can be investigated to add  
782 to the underlying understanding of the gene action that supports genomic prediction.

## 783 CONCLUSIONS

784 In conclusion, several known loci were uncovered in different combinations within the  
785 *per se* and test cross sets of a MAGIC population. Dominance of one tester over the  
786 population caused the loss of a highly significant peak for anthesis, while the presence

787 of the other tester revealed putative epistatic variation for plant height. The six parents  
788 of the population are all members of the Stiff Stalk heterotic group, which is the  
789 canonical source of seed parent germplasm in the United States. These lines represent  
790 the diversity of both the sub-heterotic groups within the Stiff Stalk pool and the major  
791 plant breeding entities operating in the 1970's and 1980's and are no longer under  
792 intellectual property protection. In addition to dissecting the genetic architecture of these  
793 complex traits, this study provides a description of a new population resource available  
794 to maize researchers. Multi-parent populations are a unique mapping resource to study  
795 the effect of more than two parental alleles on quantitative traits, and they are a means  
796 to increase the diversity of alleles under study while managing minor allele frequency.  
797 Further, the genome assemblies of the six parents with annotation from a five-tissue  
798 transcriptome atlas (Li et al. 2021; Bornowski et al. 2021) are available for study, which  
799 increases the variety of opportunities for maize researchers. This population could be  
800 used to assay the effect of the alleles present within the population on combining ability,  
801 adaptation, genotype by environment interaction, stability, and provide a new paradigm  
802 for studying traditional and genomic selection. The practicality of leveraging linkage  
803 mapping of highly polygenic traits to make selections within breeding programs has  
804 been limited in the past, especially for traits that follow an infinitesimal model such as  
805 maize height (Peiffer et al. 2014). Nevertheless, further study of individual loci can  
806 impact plant breeding through mutational studies made possible by gene editing, in  
807 addition to current efforts in commercial plant breeding accomplished through genomic  
808 selection.

809



## 810 **Data Availability**

811 All supplementary tables and files have been uploaded to FigShare. Supplemental file  
812 S1 contains summary statistics regarding the exome capture, supplemental file S2  
813 contains the exome capture probe coordinates, supplemental file S3 contains  
814 supplemental methods, supplemental file S4 is contains the unfiltered 1.8 million SNPs  
815 data, and supplemental file S5 contains the control folder for mapping in R/qtI2,  
816 including marker maps, genotypes, phenotypes, and cross information. Supplemental  
817 table ST1 contains descriptions of the lines in the study, ST2 contains details about the  
818 field experiments, ST3 contains plot-based data, ST4 contains information about the  
819 stage one models used for calculating BLUE phenotypes, ST5 contains the BLUE  
820 phenotypes, ST6 contains the reference range haplotype IDs, and ST7 contains all  
821 significant QTL peaks. Raw exome capture and GBS sequence reads are available in  
822 the National Center for Biotechnology Information Short Read Archive under  
823 BioProjects PRJNA781987 and PRJNA781986 respectively.

## 824 **Acknowledgements**

825 The authors acknowledge Mona Mazaheri and Alden Perkins for support with tissue  
826 sampling, Brieanne Vaillancourt and Joshua C. Wood for assistance with exome  
827 capture sequence data processing, Zachary Miller, Lynn Johnson, Joseph Gage for  
828 advice in building the WI-SS-MAGIC Practical Haplotype Graph, Dylan Schoemaker for  
829 helpful discussion on genomic prediction and the manuscript, and AgReliant Genetics  
830 for providing doubled haploid induction as in-kind support. The authors utilized the  
831 University of Wisconsin – Madison Biotechnology Center’s DNA Sequencing Facility  
832 (Research Resource Identifier – RRID:SCR\_017759) to extract DNA, generate GBS

833 libraries, and sequence GBS libraries. The UWBC is a Licensed Service Provider for  
834 internal and external clients, providing GBS services under license from Keygene N.V.  
835 which owns patents and patent applications protecting its Sequence Based Genotyping  
836 technologies.

### 837 **Funding**

838 This work was supported and funded by the U.S. Department of Energy Great Lakes  
839 Bioenergy Research Center (DOE BER Office of Science DE-FC02-07ER64494) to  
840 CRB, SMK, NdL; USDOE ARPA-E ROOTS Award Number DE-AR0000821, National  
841 Corn Growers Association and Iowa Corn Growers Association support to DCL, NdL,  
842 SMK; the D.C. Smith Wisconsin Distinguished Graduate Fellowship to KJM; the  
843 National Institute of Food and Agriculture, United States Department of Agriculture  
844 Hatch 1013139 and 1022702 project to SMK, and National Institutes of Health grant  
845 R01GM070683 to KWB. The work (proposal: 10.46936/10.25585/60000838) conducted  
846 by the U.S. Department of Energy Joint Genome Institute (<https://ror.org/04xm1d337>), a  
847 DOE Office of Science User Facility, is supported by the Office of Science of the U.S.  
848 Department of Energy operated under Contract No. DE-AC02-05CH11231.

### 849 **Conflict of interest**

850 The authors declare no conflicts of interest.

### 851 **REFERENCES**

852 Alter P, Bircheneder S, Zhou L-Z, Schlüter U, Gahrtz M, Sonnewald U, Dresselhaus T.  
853 2016. Flowering time-regulated genes in maize include the transcription factor  
854 *ZmMADS1*. *Plant Physiol.* 172(1):389–404. <https://doi.org/10.1104/pp.16.00285>

- 855 Austin DF, Lee M, Veldboom LR. 2001. Genetic mapping in maize with hybrid progeny  
856 across testers and generations: plant height and flowering. *Theor Appl Genet.*  
857 102(1):163–176. <https://doi.org/10.1007/s001220051632>
- 858 Bauer E, Falque M, Walter H, Bauland C, Camisan C, Campo L, Meyer N, Ranc N,  
859 Rincent R, Schipprack W, et al. 2013. Intraspecific variation of recombination rate  
860 in maize. *Genome Biology.* 14(9):R103. [https://doi.org/10.1186/gb-2013-14-9-](https://doi.org/10.1186/gb-2013-14-9-r103)  
861 [r103](https://doi.org/10.1186/gb-2013-14-9-r103)
- 862 Baum ME, Archontoulis SV, Licht MA. 2019. Planting date, hybrid maturity, and weather  
863 effects on maize yield and crop stage. *Agron J.* 111(1):303–313.  
864 <https://doi.org/10.2134/agronj2018.04.0297>
- 865 Bernardo R. 2014. Genomewide selection when major genes are known. *Crop Sci.*  
866 54(1):68–75. <https://doi.org/10.2135/cropsci2013.05.0315>
- 867 Bornowski N, Michel KJ, Hamilton JP, Ou S, Seetharam AS, Jenkins J, Grimwood J,  
868 Plott C, Shu S, Talag J, et al. 2021. Genomic variation within the maize stiff-stalk  
869 heterotic germplasm pool. *Plant Genome.* 14(3):e20114.  
870 <https://doi.org/10.1002/tpg2.20114>
- 871 Bradbury PJ, Casstevens T, Jensen SE, Johnson LC, Miller ZR, Monier B, Romay MC,  
872 Song B, Buckler ES. 2021. The Practical Haplotype Graph, a platform for storing  
873 and using pangenomes for imputation. *bioRxiv [Internet].* [accessed 2021 Oct  
874 25]. <https://doi.org/10.1101/2021.08.27.457652>

- 875 Bradbury PJ, Zhang Z, Kroon DE, Casstevens TM, Ramdoss Y, Buckler ES. 2007.  
876 TASSEL: Software for association mapping of complex traits in diverse samples.  
877 Bioinformatics. 23(19):2633–2635. <https://doi.org/10.1093/bioinformatics/btm308>
- 878 Brohammer AB, Kono TJY, Springer NM, McGaugh SE, Hirsch CN. 2018. The limited  
879 role of differential fractionation in genome content variation and function in maize  
880 (*Zea mays* L.) inbred lines. Plant J. 93(1):131–141.  
881 <https://doi.org/10.1111/tpj.13765>
- 882 Broman KW, Gatti DM, Simecek P, Furlotte NA, Prins P, Sen S, Yandell BS, Churchill  
883 GA. 2019. R/qtl2: Software for mapping quantitative trait loci with high-  
884 dimensional data and multiparent populations. Genetics. 211(2):495–502.  
885 <https://doi.org/10.1534/genetics.118.301595>
- 886 Broman KW, Sen S. 2009. *A Guide to QTL Mapping with R/qtl*. New York: Springer.
- 887 Buckler ES, Holland JB, Bradbury PJ, Acharya CB, Brown PJ, Browne C, Ersoz E, Flint-  
888 Garcia S, Garcia A, Glaubitz JC, et al. 2009. The genetic architecture of maize  
889 flowering time. Science. 325(5941):714–718.  
890 <https://doi.org/10.1126/science.1174276>
- 891 Butler DG, Cullis BR, Gilmour AR, Gogel BG, Thompson R. 2017. Asreml-R reference  
892 manual version 4. Hemel Hempstead, HP1 1ES, UK: VSN International Ltd.
- 893 Cai H, Chu Q, Gu R, Yuan L, Liu J, Zhang X, Chen F, Mi G, Zhang F. 2012.  
894 Identification of QTLs for plant height, ear height and grain yield in maize (*Zea*

- 895            *mays* L.) in response to nitrogen and phosphorus supply. *Plant Breed.*  
896            131(4):502–510. <https://doi.org/10.1111/j.1439-0523.2012.01963.x>
- 897    Chen Y, Hou M, Liu L, Wu S, Shen Y, Ishiyama K, Kobayashi M, McCarty DR, Tan B-C.  
898            2014. The maize *DWARF1* encodes a gibberellin 3-oxidase and is dual localized  
899            to the nucleus and cytosol. *Plant Physiol.* 166(4):2028–2039.  
900            <https://doi.org/10.1104/pp.114.247486>
- 901    Cheng R, Palmer AA. 2013. A simulation study of permutation, bootstrap, and gene  
902            dropping for assessing statistical significance in the case of unequal relatedness.  
903            *Genetics.* 193(3):1015–1018. <https://doi.org/10.1534/genetics.112.146332>
- 904    Churchill GA, Doerge RW. 1994. Empirical threshold values for quantitative trait  
905            mapping. *Genetics.* 138(3):963–971. <https://doi.org/10.1093/genetics/138.3.963>
- 906    Colasanti J, Yuan Z, Sundaresan V. 1998. The *indeterminate* gene encodes a zinc  
907            finger protein and regulates a leaf-generated signal required for the transition to  
908            flowering in maize. *Cell.* 93(4):593–603. [https://doi.org/10.1016/S0092-](https://doi.org/10.1016/S0092-8674(00)81188-5)  
909            [8674\(00\)81188-5](https://doi.org/10.1016/S0092-8674(00)81188-5)
- 910    Cullis BR, Smith AB, Coombes NE. 2006. On the design of early generation variety  
911            trials with correlated data. *J Agric Biol Environ Stat.* 11(4):381–393.  
912            <https://doi.org/10.1198/108571106X154443>
- 913    Dekalb Plant Genetics. 1994. Corn “3IIH6” [Internet]. [accessed 2021 Jul 15].  
914            <https://apps.ams.usda.gov/CMS/AdobelImages/009300087.pdf>

- 915 Dell'Acqua M, Gatti DM, Pea G, Cattonaro F, Coppens F, Magris G, Hlaing AL, Aung  
916 HH, Nelissen H, Baute J, et al. 2015. Genetic properties of the MAGIC maize  
917 population: a new platform for high definition QTL mapping in *Zea mays*.  
918 *Genome Biol.* 16(1):167. <https://doi.org/10.1186/s13059-015-0716-z>
- 919 Ding J, Zhang L, Chen J, Li X, Li Y, Cheng H, Huang R, Zhou B, Li Z, Wang J, Wu J.  
920 2015. Genomic dissection of leaf angle in maize (*Zea mays* L.) using a four-way  
921 cross mapping population. *PLOS ONE.* 10(10):e0141619.  
922 <https://doi.org/10.1371/journal.pone.0141619>
- 923 Ding X, Wu X, Chen L, Li C, Shi Y, Song Y, Zhang D, Wang T, Li Yu, Liu Z, Li Yong-  
924 xiang. 2016. Both major and minor QTL associated with plant height can be  
925 identified using near-isogenic lines in maize. *Euphytica.* 213(1):21.  
926 <https://doi.org/10.1007/s10681-016-1825-9>
- 927 Duvick DN, Cassman KG. 1999. Post–green revolution trends in yield potential of  
928 temperate maize in the north-central United States. *Crop Sci.* 39(6):1622–1630.  
929 <https://doi.org/10.2135/cropsci1999.3961622x>
- 930 Elshire RJ, Glaubitz JC, Sun Q, Poland JA, Kawamoto K, Buckler ES, Mitchell SE.  
931 2011. A robust, simple genotyping-by-sequencing (GBS) approach for high  
932 diversity species. *PLOS ONE.* 6(5):e19379.  
933 <https://doi.org/10.1371/journal.pone.0019379>

- 934 Endelman JB. 2011. Ridge regression and other kernels for genomic selection with R  
935 package rrblup. *Plant Genome*. 4(3):250–255.  
936 <https://doi.org/10.3835/plantgenome2011.08.0024>
- 937 Ewels P, Magnusson M, Lundin S, Källner M. 2016. MultiQC: summarize analysis results  
938 for multiple tools and samples in a single report. *Bioinformatics*. 32(19):3047–  
939 3048. <https://doi.org/10.1093/bioinformatics/btw354>
- 940 Falconer DS, Mackay TFC. 1989. *Introduction to Quantitative Genetics*. 3th ed. New  
941 York, NY: John Wiley and Sons, Inc.
- 942 Flint-Garcia SA, Buckler ES, Tiffin P, Ersoz E, Springer NM. 2009. Heterosis is  
943 prevalent for multiple traits in diverse maize germplasm. *PLoS ONE*.  
944 4(10):e7433. <https://doi.org/10.1371/journal.pone.0007433>
- 945 Frascaroli E, Canè MA, Pè ME, Pea G, Morgante M, Landi P. 2009. QTL detection in  
946 maize testcross progenies as affected by related and unrelated testers. *Theor  
947 Appl Genet*. 118(5):993–1004. <https://doi.org/10.1007/s00122-008-0956-3>
- 948 Gardner KA, Wittern LM, Mackay IJ. 2016. A highly recombined, high-density, eight-  
949 founder wheat MAGIC map reveals extensive segregation distortion and genomic  
950 locations of introgression segments. *Plant Biotechnol J*. 14(6):1406–1417.  
951 <https://doi.org/10.1111/pbi.12504>
- 952 Giraud H, Bauland C, Falque M, Madur D, Combes V, Jamin P, Monteil C, Laborde J,  
953 Palaffre C, Gaillard A, et al. 2017. Reciprocal Genetics: Identifying QTL for  
954 General and Specific Combining Abilities in Hybrids Between Multiparental

- 955 Populations from Two Maize (*Zea mays* L.) Heterotic Groups. *Genetics*.  
956 207(3):1167–1180. <https://doi.org/10.1534/genetics.117.300305>
- 957 Guo L, Wang X, Zhao M, Huang C, Li C, Li D, Yang CJ, York AM, Xue W, Xu G, et al.  
958 2018. Stepwise cis-regulatory changes in *ZCN8* contribute to maize flowering-  
959 time adaptation. *Curr Biol*. 28(18):3005-3015.e4.  
960 <https://doi.org/10.1016/j.cub.2018.07.029>
- 961 Hayes BJ, Visscher PM, Goddard ME. 2009. Increased accuracy of artificial selection  
962 by using the realized relationship matrix. *Genet Res*. 91(1):47–60.  
963 <https://doi.org/10.1017/S0016672308009981>
- 964 Hinze LL, Lamkey KR. 2003. Absence of epistasis for grain yield in elite maize hybrids.  
965 *Crop Sci*. 43(1):46–56. <https://doi.org/10.2135/cropsci2003.4600>
- 966 Huang C, Sun H, Xu D, Chen Q, Liang Y, Wang X, Xu G, Tian J, Wang C, Li D, et al.  
967 2018. *ZmCCT9* enhances maize adaptation to higher latitudes. *Proc Natl Acad*  
968 *Sci*. 115(2):E334–E341. <https://doi.org/10.1073/pnas.1718058115>
- 969 Hung H-Y, Shannon LM, Tian F, Bradbury PJ, Chen C, Flint-Garcia SA, McMullen MD,  
970 Ware D, Buckler ES, Doebley JF, Holland JB. 2012. *ZmCCT* and the genetic  
971 basis of day-length adaptation underlying the postdomestication spread of maize.  
972 *Proc Natl Acad Sci*. 109(28):E1913–E1921.  
973 <https://doi.org/10.1073/pnas.1203189109>
- 974 Huynh B-L, Ehlers JD, Huang BE, Muñoz-Amatriaín M, Lonardi S, Santos JRP, Ndeve  
975 A, Batiemo BJ, Boukar O, Cisse N, et al. 2018. A multi-parent advanced



- 976 generation inter-cross (MAGIC) population for genetic analysis and improvement  
977 of cowpea (*Vigna unguiculata* L. Walp.). *Plant J.* 93(6):1129–1142.  
978 <https://doi.org/10.1111/tpj.13827>
- 979 Jarquin D, Howard R, Liang Z, Gupta SK, Schnable JC, Crossa J. 2020. Enhancing  
980 hybrid prediction in pearl millet using genomic and/or multi-environment  
981 phenotypic information of inbreds. *Front Genet.* 10:1294.  
982 <https://doi.org/10.3389/fgene.2019.01294>
- 983 Jiménez-Galindo JC, Malvar RA, Butrón A, Santiago R, Samayoa LF, Caicedo M,  
984 Ordás B. 2019. Mapping of resistance to corn borers in a MAGIC population of  
985 maize. *BMC Plant Biol.* 19(1):431. <https://doi.org/10.1186/s12870-019-2052-z>
- 986 Jin M, Liu X, Jia W, Liu H, Li W, Peng Y, Du Y, Wang Y, Yin Y, Zhang X, et al. 2018.  
987 *ZmCOL3*, a *CCT* gene represses flowering in maize by interfering with the  
988 circadian clock and activating expression of *ZmCCT*. *J Integr Plant Biol.*  
989 60(6):465–480. <https://doi.org/10.1111/jipb.12632>
- 990 Khush GS. 2001. Green revolution: the way forward. *Nat Rev Genet.* 2(10):815–822.  
991 <https://doi.org/10.1038/35093585>
- 992 Kover PX, Valdar W, Trakalo J, Scarcelli N, Ehrenreich IM, Purugganan MD, Durrant C,  
993 Mott R. 2009. A multiparent advanced generation inter-cross to fine-map  
994 quantitative traits in *Arabidopsis thaliana*. Mauricio R, editor. *PLoS Genet.*  
995 5(7):e1000551. <https://doi.org/10.1371/journal.pgen.1000551>

- 996 Li C, Li Yongxiang, Bradbury PJ, Wu X, Shi Y, Song Y, Zhang D, Rodgers-Melnick E,  
997 Buckler ES, Zhang Z, et al. 2015. Construction of high-quality recombination  
998 maps with low-coverage genomic sequencing for joint linkage analysis in maize.  
999 BMC Biol. 13(1):78. <https://doi.org/10.1186/s12915-015-0187-4>
- 1000 Li C, Li Yongxiang, Sun B, Peng B, Liu C, Liu Z, Yang Z, Li Q, Tan W, Zhang Y, et al.  
1001 2013. Quantitative trait loci mapping for yield components and kernel-related  
1002 traits in multiple connected RIL populations in maize. Euphytica. 193(3):303–316.  
1003 <https://doi.org/10.1007/s10681-013-0901-7>
- 1004 Li L, Xu X, Jin W, Chen S. 2009. Morphological and molecular evidences for DNA  
1005 introgression in haploid induction via a high oil inducer CAUHOI in maize. Planta.  
1006 230(2):367–376. <https://doi.org/10.1007/s00425-009-0943-1>
- 1007 Li Z, Coffey L, Garfin J, Miller ND, White MR, Spalding EP, Leon N de, Kaepler SM,  
1008 Schnable PS, Springer NM, Hirsch CN. 2018. Genotype-by-environment  
1009 interactions affecting heterosis in maize. PLOS ONE. 13(1):e0191321.  
1010 <https://doi.org/10.1371/journal.pone.0191321>
- 1011 Li Z, Zhou P, Coletta RD, Zhang T, Brohammer AB, O'Connor CH, Vaillancourt B,  
1012 Lipzen A, Daum C, Barry K, et al. 2021. Single-parent expression drives dynamic  
1013 gene expression complementation in maize hybrids. Plant J. 105(1):93–107.  
1014 <https://doi.org/10.1111/tpj.15042>
- 1015 Liang Y, Liu Q, Wang X, Huang C, Xu G, Hey S, Lin H-Y, Li C, Xu D, Wu L, et al. 2019.  
1016 *ZmMADS69* functions as a flowering activator through the *ZmRap2.7-ZCN8*

- 1017 regulatory module and contributes to maize flowering time adaptation. *New*  
1018 *Phytol.* 221(4):2335–2347. <https://doi.org/10.1111/nph.15512>
- 1019 Liang Z, Gupta SK, Yeh C-T, Zhang Y, Ngu DW, Kumar R, Patil HT, Mungra KD, Yadav  
1020 DV, Rathore A, et al. 2018. Phenotypic data from inbred parents can improve  
1021 genomic prediction in pearl millet hybrids. *G3 Genes|Genomes|Genetics.*  
1022 8(7):2513–2522. <https://doi.org/10.1534/g3.118.200242>
- 1023 Lübberstedt T, Melchinger AE, Schön CC, Utz HF, Klein D. 1997. QTL mapping in  
1024 testcrosses of European flint lines of maize: i. Comparison of different testers for  
1025 forage yield traits. *Crop Sci.* 37(3):921–931.  
1026 <https://doi.org/10.2135/cropsci1997.0011183X003700030037x>
- 1027 Mahan AL, Murray SC, Klein PE. 2018. Four-parent maize (FPM) population:  
1028 development and phenotypic characterization. *Crop Sci.* 58(3):1106–1117.  
1029 <https://doi.org/10.2135/cropsci2017.07.0450>
- 1030 Makarevitch I, Thompson A, Muehlbauer GJ, Springer NM. 2012. *Brd1* gene in maize  
1031 encodes a brassinosteroid c-6 oxidase. *PLoS ONE.* 7(1):e30798.  
1032 <https://doi.org/10.1371/journal.pone.0030798>
- 1033 Marçais G, Delcher AL, Phillippy AM, Coston R, Salzberg SL, Zimin A. 2018.  
1034 MUMmer4: a fast and versatile genome alignment system. *PLOS Comput Biol.*  
1035 14(1):e1005944. <https://doi.org/10.1371/journal.pcbi.1005944>

- 1036 Martin M. 2011. Cutadapt removes adapter sequences from high-throughput  
1037 sequencing reads. *EMBnet.journal*. 17(1):10–12.  
1038 <https://doi.org/10.14806/ej.17.1.200>
- 1039 Mascher M, Richmond TA, Gerhardt DJ, Himmelbach A, Clissold L, Sampath D, Ayling  
1040 S, Steuernagel B, Pfeifer M, D’Ascenzo M, et al. 2013. Barley whole exome  
1041 capture: a tool for genomic research in the genus *Hordeum* and beyond. *Plant J*.  
1042 76(3):494–505. <https://doi.org/10.1111/tpj.12294>
- 1043 Mazaheri M, Heckwolf M, Vaillancourt B, Gage JL, Burdo B, Heckwolf S, Barry K,  
1044 Lipzen A, Ribeiro CB, Kono TJY, et al. 2019. Genome-wide association analysis  
1045 of stalk biomass and anatomical traits in maize. *BMC Plant Biol*. 19(1):1–17.  
1046 <https://doi.org/10.1186/s12870-019-1653-x>
- 1047 Melchinger AE, Utz HF, Schön CC. 1998. Quantitative trait locus (QTL) mapping using  
1048 different testers and independent population samples in maize reveals low power  
1049 of QTL detection and large bias in estimates of QTL effects. *Genetics*.  
1050 149(1):383–403.
- 1051 Mihaljevic R, Utz HF, Melchinger AE. 2005. No evidence for epistasis in hybrid and per  
1052 se performance of elite European flint maize inbreds from generation means and  
1053 QTL analyses. *Crop Sci*. 45(6):2605–2613.  
1054 <https://doi.org/10.2135/cropsci2004.0760>

- 1055 Mikel MA. 2011. Genetic composition of contemporary U.S. commercial dent corn  
1056 germplasm. *Crop Sci.* 51(2):592–599.  
1057 <https://doi.org/10.2135/cropsci2010.06.0332>
- 1058 Muszynski MG, Dam T, Li B, Shirbroun DM, Hou Z, Bruggemann E, Archibald R,  
1059 Ananiev EV, Danilevskaya ON. 2006. *delayed flowering1* encodes a basic  
1060 leucine zipper protein that mediates floral inductive signals at the shoot apex in  
1061 maize. *Plant Physiol.* 142(4):1523–1536. <https://doi.org/10.1104/pp.106.088815>
- 1062 Ogawa D, Nonoue Y, Tsunematsu H, Kanno N, Yamamoto T, Yonemaru J-I. 2018.  
1063 Discovery of QTL alleles for grain shape in the Japan-MAGIC rice population  
1064 using haplotype information. *G3 Genes|Genomes|Genetics.* 8(11):3559–3565.  
1065 <https://doi.org/10.1534/g3.118.200558>
- 1066 Ongom PO, Ejeta G. 2018. Mating design and genetic structure of a multi-parent  
1067 advanced generation intercross (MAGIC) population of sorghum (*Sorghum*  
1068 *bicolor* (L.) Moench). *G3 Genes|Genomes|Genetics.* 8(1):331–341.  
1069 <https://doi.org/10.1534/g3.117.300248>
- 1070 Pascual L, Desplat N, Huang BE, Desgroux A, Bruguier L, Bouchet J-P, Le QH,  
1071 Chauchard B, Verschave P, Causse M. 2015. Potential of a tomato MAGIC  
1072 population to decipher the genetic control of quantitative traits and detect causal  
1073 variants in the resequencing era. *Plant Biotechnol J.* 13(4):565–577.  
1074 <https://doi.org/10.1111/pbi.12282>

- 1075 Peiffer JA, Romay MC, Gore MA, Flint-Garcia SA, Zhang Z, Millard MJ, Gardner CAC,  
1076 McMullen MD, Holland JB, Bradbury PJ, Buckler ES. 2014. The genetic  
1077 architecture of maize height. *Genetics*. 196(4):1337–1356.  
1078 <https://doi.org/10.1534/genetics.113.159152>
- 1079 Pioneer Hi-Bred International Inc. 1992. Corn “PHJ89” [Internet]. [accessed 2021 Jul  
1080 15]. <https://apps.ams.usda.gov/CMS/AdobelImages/009100092.pdf>
- 1081 Poland JA, Brown PJ, Sorrells ME, Jannink J-L. 2012. Development of high-density  
1082 genetic maps for barley and wheat using a novel two-enzyme genotyping-by-  
1083 sequencing approach. *PLoS ONE*. 7(2):e32253.  
1084 <https://doi.org/10.1371/journal.pone.0032253>
- 1085 Pope R. 2008. Calculating degree days. Iowa State Univ Ext Outreach Integr Crop  
1086 Manag [Internet]. [accessed 2021 Apr 22].  
1087 <https://crops.extension.iastate.edu/cropnews/2008/04/calculating-degree-days>
- 1088 RCoreTeam. 2018. R: A language and environment for statistical computing. [place  
1089 unknown].
- 1090 Rogers AR, Dunne JC, Romay C, Bohn M, Buckler ES, Ciampitti IA, Edwards J, Ertl D,  
1091 Flint-Garcia S, Gore MA, et al. 2021. The importance of dominance and  
1092 genotype-by-environment interactions on grain yield variation in a large-scale  
1093 public cooperative maize experiment. *G3 Genes|Genomes|Genetics*. 11(2).  
1094 <https://doi.org/10.1093/g3journal/jkaa050>
- 1095 Russell WA. 1972. PL-17, Maize. *Crop Sci Regist*. 12(5):721.

- 1096 Russell WA. 1979. Registration of B84 parental line of maize. PL-50, Maize. Crop Sci  
1097 Regist. 19(4):566.
- 1098 Saghai-Maroo MA, Soliman KM, Jorgensen RA, Allard RW. 1984. Ribosomal DNA  
1099 spacer-length polymorphisms in barley: Mendelian inheritance, chromosomal  
1100 location, and population dynamics. Proc Natl Acad Sci. 81(24):8014–8018.  
1101 <https://doi.org/10.1073/pnas.81.24.8014>
- 1102 Salas Fernandez MG, Becraft PW, Yin Y, Lübberstedt T. 2009. From dwarves to  
1103 giants? Plant height manipulation for biomass yield. Trends Plant Sci. 14(8):454–  
1104 461. <https://doi.org/10.1016/j.tplants.2009.06.005>
- 1105 Salvi S, Sponza G, Morgante M, Tomes D, Niu X, Fengler KA, Meeley R, Ananiev EV,  
1106 Svitashv S, Bruggemann E, et al. 2007. Conserved noncoding genomic  
1107 sequences associated with a flowering-time quantitative trait locus in maize. Proc  
1108 Natl Acad Sci U S A. 104(27):11376–11381.  
1109 <https://doi.org/10.1073/pnas.0704145104>
- 1110 Sannemann W, Huang BE, Mathew B, Léon J. 2015. Multi-parent advanced generation  
1111 inter-cross in barley: high-resolution quantitative trait locus mapping for flowering  
1112 time as a proof of concept. Mol Breed. 35(3):86. [https://doi.org/10.1007/s11032-  
1113 015-0284-7](https://doi.org/10.1007/s11032-015-0284-7)
- 1114 Schrag TA, Möhring J, Melchinger AE, Kusterer B, Dhillon BS, Piepho H-P, Frisch M.  
1115 2010. Prediction of hybrid performance in maize using molecular markers and

- 1116 joint analyses of hybrids and parental inbreds. *Theor Appl Genet.* 120(2):451–  
1117 461. <https://doi.org/10.1007/s00122-009-1208-x>
- 1118 Schwarz G. 1978. Estimating the dimension of a model. *Ann Stat.* 6(2):461–464.
- 1119 Scott MF, Ladejobi O, Amer S, Bentley AR, Biernaskie J, Boden SA, Clark M,  
1120 Dell'Acqua M, Dixon LE, Filippi CV, et al. 2020. Multi-parent populations in crops:  
1121 a toolbox integrating genomics and genetic mapping with breeding. *Heredity.*  
1122 125(6):396–416. <https://doi.org/10.1038/s41437-020-0336-6>
- 1123 Seye AI, Bauland C, Giraud H, Mechin V, Reymond M, Charcosset A, Moreau L. 2019.  
1124 Quantitative trait loci mapping in hybrids between Dent and Flint maize  
1125 multiparental populations reveals group-specific QTL for silage quality traits with  
1126 variable pleiotropic effects on yield. *Theor Appl Genet.* 132(5):1523–1542.  
1127 <https://doi.org/10.1007/s00122-019-03296-2>
- 1128 Stephenson E, Estrada S, Meng X, Ourada J, Muszynski MG, Habben JE,  
1129 Danilevskaya ON. 2019. Over-expression of the photoperiod response regulator  
1130 *ZmCCT10* modifies plant architecture, flowering time and inflorescence  
1131 morphology in maize. *PLOS ONE.* 14(2):e0203728.  
1132 <https://doi.org/10.1371/journal.pone.0203728>
- 1133 Tibbs Cortes L, Zhang Z, Yu J. 2021. Status and prospects of genome-wide association  
1134 studies in plants. *Plant Genome.* 14(1):e20077.  
1135 <https://doi.org/10.1002/tpg2.20077>
- 1136 Troyer AF. 1999. (1999) Background of U.S. Hybrid Corn. *Crop Sci.* 39:601–626.



- 1137 Troyer AF. 2004. Background of U.S. Hybrid Corn II: Breeding, Climate, and Food. *Crop*  
1138 *Sci.* 44(2):370–380. <https://doi.org/10.2135/cropsci2004.3700>
- 1139 Wallace JG, Zhang X, Beyene Y, Semagn K, Olsen M, Prasanna BM, Buckler ES.  
1140 2016. Genome-wide association for plant height and flowering time across 15  
1141 tropical maize populations under managed drought stress and well-watered  
1142 conditions in sub-Saharan Africa. *Crop Sci.* 56(5):2365–2378.  
1143 <https://doi.org/10.2135/cropsci2015.10.0632>
- 1144 Wang L, Zhou Z, Li R, Weng J, Zhang Q, Li Xinghua, Wang B, Zhang W, Song W, Li  
1145 Xinhai. 2021. Mapping QTL for flowering time-related traits under three plant  
1146 densities in maize. *Crop J.* 9(2):372–379. <https://doi.org/10.1016/j.cj.2020.07.009>
- 1147 Wang X, Wu Liuji, Zhang S, Wu Liancheng, Ku L, Wei X, Xie L, Chen Y. 2011. Robust  
1148 expression and association of *ZmCCA1* with circadian rhythms in maize. *Plant*  
1149 *Cell Rep.* 30(7):1261–1272. <https://doi.org/10.1007/s00299-011-1036-8>
- 1150 White MR, Mikel MA, de Leon N, Kaepler SM. 2020. Diversity and heterotic patterns in  
1151 North American proprietary dent maize germplasm. *Crop Sci.* 60(1):100–114.  
1152 <https://doi.org/10.1002/csc2.20050>
- 1153 Xiao Y, Jiang S, Cheng Q, Wang Xiaqing, Yan Jun, Zhang R, Qiao F, Ma C, Luo J, Li  
1154 W, et al. 2021. The genetic mechanism of heterosis utilization in maize  
1155 improvement. *Genome Biol.* 22(1):148. [https://doi.org/10.1186/s13059-021-](https://doi.org/10.1186/s13059-021-02370-7)  
1156 [02370-7](https://doi.org/10.1186/s13059-021-02370-7)

- 1157 Xu J, Liu Y, Liu J, Cao M, Wang J, Lan H, Xu Y, Lu Y, Pan G, Rong T. 2012. The  
1158 genetic architecture of flowering time and photoperiod sensitivity in maize as  
1159 revealed by QTL review and meta analysis. *J Integr Plant Biol.* 54(6):358–373.  
1160 <https://doi.org/10.1111/j.1744-7909.2012.01128.x>
- 1161 Yang J, Zaitlen NA, Goddard ME, Visscher PM, Price AL. 2014. Advantages and pitfalls  
1162 in the application of mixed-model association methods. *Nat Genet.* 46(2):100–  
1163 106. <https://doi.org/10.1038/ng.2876>
- 1164 Yu J, Holland JB, McMullen MD, Buckler ES. 2008. Genetic design and statistical power  
1165 of nested association mapping in maize. *Genetics.* 178(1):539–551.  
1166 <https://doi.org/10.1534/genetics.107.074245>

1167

## 1168 **Figure Captions**

1169 Figure 1: Distributions of phenotypic BLUEs and heritabilities

1170 Distributions for anthesis growing degree units (GDU) and plant height for the UW-  
1171 MAGIC-SS *per se* population, SS-3IIH6 hybrid population, and SS-PHJ89 hybrid  
1172 population. Trait heritabilities are in the upper left of each plot. Population parent BLUEs  
1173 are plotted as colored lines behind each distribution.

1174 Figure 2: Phenotypic correlations between populations

1175 Scatterplots of BLUEs demonstrate the positive correlation within traits, between  
1176 populations. Pearson correlations are shown in the lower right.

1177 Figure 3: Population genetic characteristics

1178 (A) Distribution of the number of consensus haplotypes found per reference range. (B)  
1179 Multidimensional scale plot using 1.8 million genic SNPs, with the population parents  
1180 plotted in red. (C) Distribution of the minor allele frequencies for 100,000 filtered  
1181 numeric SNPs, with vertical lines plotted at expected peaks of 1/6 and 2/6. (D)  
1182 Histogram of the number of crossovers per individual for the two population subsets  
1183 prior to filtering lines with high total crossovers. Six lines with more than 600 crossovers  
1184 are not included. Vertical lines indicate the thresholds used for discarding lines at 150  
1185 crossovers for subset A (generated using three meioses) and 250 crossovers for subset  
1186 B (generated using five meioses).

1187 Figure 4: Anthesis GDU QTL mapping

1188 Population specific LOD scores are plotted for each panel. Dashed vertical lines show  
1189 known flowering time genes. (A) QTL peaks for the *per se* population for each of the ten  
1190 chromosomes. (B) QTL peaks for chromosome eight of the SS-3IIH6 population and the  
1191 DH lines that were used to generate the population. (C) QTL peaks for chromosome  
1192 eight of the SS-PHJ89 population and the DH lines that were used to generate the  
1193 population.

1194 Figure 5: Founder anthesis GDU QTL BLUP effects

1195 BLUP effects for each parental contribution are plotted for the two chromosomes  
1196 containing the most significant peaks for flowering time. Vertical lines are plotted  
1197 denoting three major flowering time loci.

1198 Figure 6: Plant height QTL mapping

1199 Population specific LOD scores are plotted for each panel. Dashed vertical lines show  
1200 known height genes. (A) QTL peaks for the *per se* population for each of the ten  
1201 chromosomes. (B) QTL peaks for three chromosomes of the SS-3IIH6 population and  
1202 the DH lines that were used to generate the population. (C) QTL peaks for three  
1203 chromosomes of the SS-PHJ89 population and the DH lines that were used to generate  
1204 the population.

1205 Figure 7: Predictive abilities for direct and indirect genomic prediction models

1206 Legend: Predictive abilities for 100 replications of each model. Direct models were  
1207 trained using the population phenotype they would predict, while indirect models were  
1208 trained with the *per se* or opposite hybrid population and used to predict each  
1209 phenotype.

1210 Supplemental Figure 1: Phenotypic correlations between traits

1211 Scatterplots of BLUEs demonstrate the positive correlation between traits, within  
1212 populations. Pearson correlations are shown in the upper left.

1213 Supplemental Figure 2: Haplotypes for six representative UW-SS-MAGIC lines

1214 Lines in the top row are from Subset A, and each have 60 crossovers. Lines in the  
1215 bottom row are from Subset B, and each have 103 crossovers. Genomic areas plotted  
1216 in white did not have a founder probability rise above 50% in that region.

1217 Supplemental Figure 3: QTL linkage mapping and GWAS for flowering time

1218 (A) Anthesis GDU QTL peaks and SNP association results in the *per se* population. (B)  
1219 Silking GDU QTL peaks and SNP association results in the *per se* population.

1220 Supplemental Figure 4: QTL linkage mapping and GWAS for plant and ear height

1221 (A) Plant height QTL peaks and SNP association results in the *per se* population. (B)

1222 Ear height QTL peaks and SNP association results in the *per se* population.

1223 Supplemental Figure 5: All significant QTL identified for flowering time and plant height

1224 Significant loci are plotted for flowering and height traits for the *per se* population, SS-

1225 3IIH6 hybrid population, and SS-PHJ89 hybrid populations. Previously characterized

1226 flowering and height loci are plotted as dashed vertical lines. To declare two significant

1227 loci under one large QTL peak, the LOD score was required to drop by at least five.

1228 Supplemental Figure 6: Founder plant height BLUP effects

1229 QTL BLUP effects with +/- 2 standard errors at the most significant locus for SS-3IIH6

1230 plant height in the *per se*, SS-3IIH6, and SS-PHJ89 populations on chromosomes six.

1231 This QTL was not significant in the *per se* or SS-PHJ89 populations.

1232 Supplemental Figure 7: Observed vs predicted phenotypes and discard accuracy

1233 (A) Scatterplot of observed vs predicted anthesis GDU for the *per se* population. To

1234 select for adaptation to Wisconsin, our breeding program discards the latest lines of a

1235 population. Lines in the top 15% of both observed and predicted anthesis values (i.e.

1236 flower the latest) are colored in green, lines that flower in the latest 15% of predicted

1237 values are plotted in pink, and lines that flower in the latest 15% of observed values are

1238 plotted in blue. Color is recorded for each DH line name. (B) Using the DH line color

1239 scheme from A, the hybrid phenotypes are plotted for SS-3IIH6 and SS-PHJ89. (C)

1240 Scatterplot of observed vs predicted plant height for the *per se* population. Our breeding

1241 program discards the tallest members of the population. Lines are colored in the same  
1242 manner as Panel A. (D) Using the DH line color scheme from C, the hybrid phenotypes  
1243 are plotted for SS-3IIH6 and SS-PHJ89.

1244 Supplemental Figure 8: Box plots for each *per se* digenic class for two flowering time  
1245 loci

1246 The study of epistasis is difficult due to low sample sizes of each digenic class. Each  
1247 panel represents a digenic class for the two most significant *per se* anthesis GDU loci  
1248 on chromosomes three and eight. The population wide mean is plotted as a red dot on  
1249 each panel. Sample size for each class is in the lower left corner.

1250 Supplemental Figure 9: Bar plots for each SS-3IIH6 digenic class for two plant height  
1251 loci

1252 The study of epistasis is difficult due to low sample sizes of each digenic class. Each  
1253 panel represents a digenic class for two significant SS-3IIH6 plant height loci on  
1254 chromosomes one and six. The population wide mean is plotted as a red dot on each  
1255 panel. Sample size for each class is in the lower left corner. Some digenic classes have  
1256 no observed individuals.

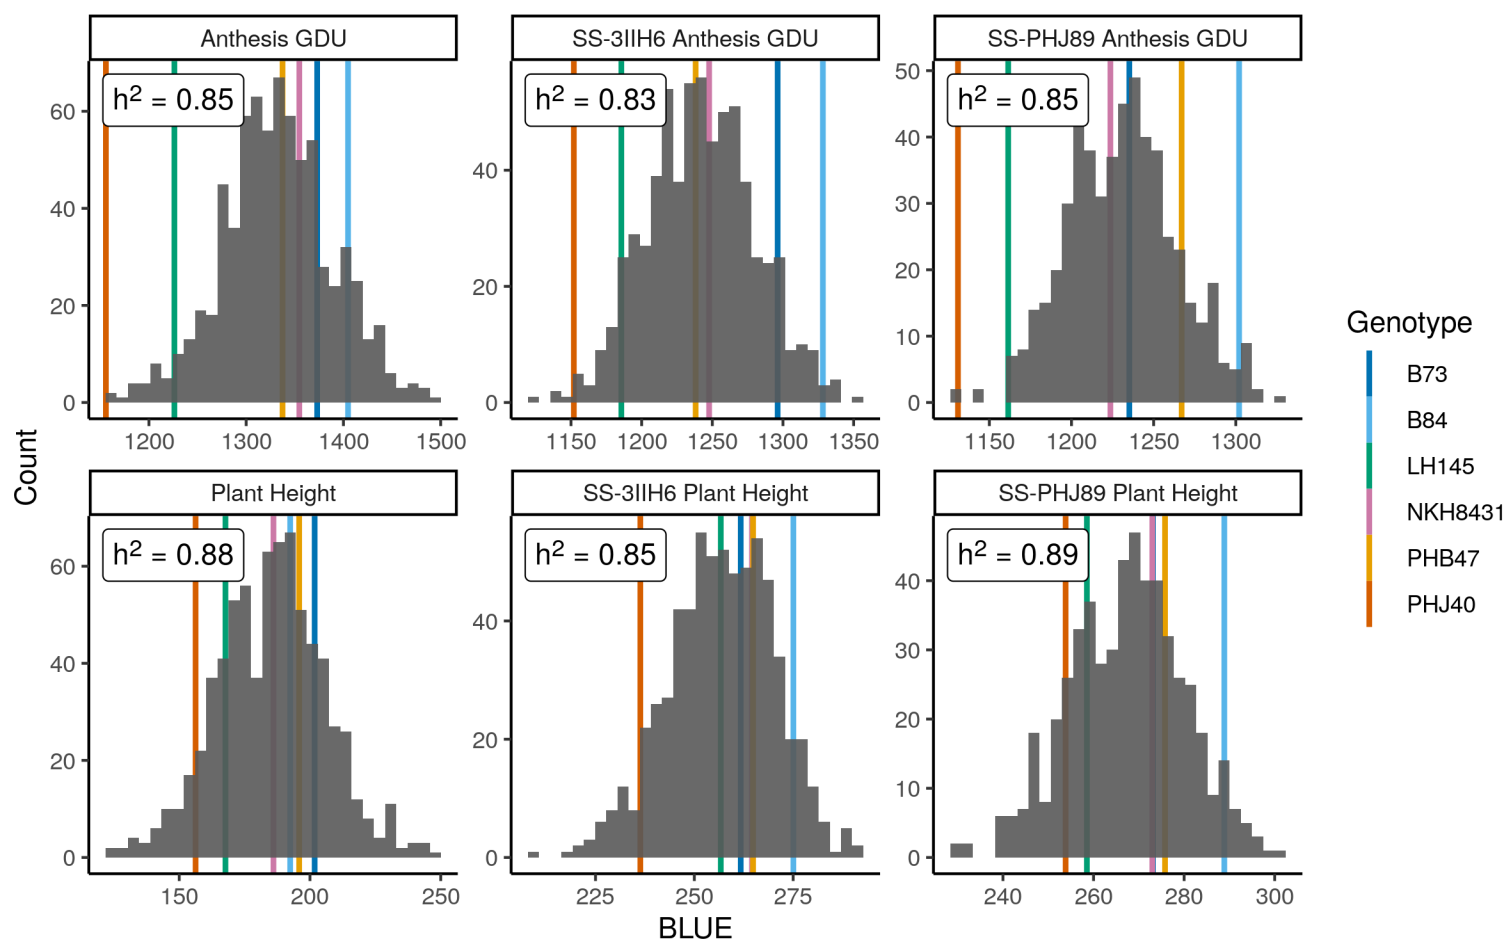

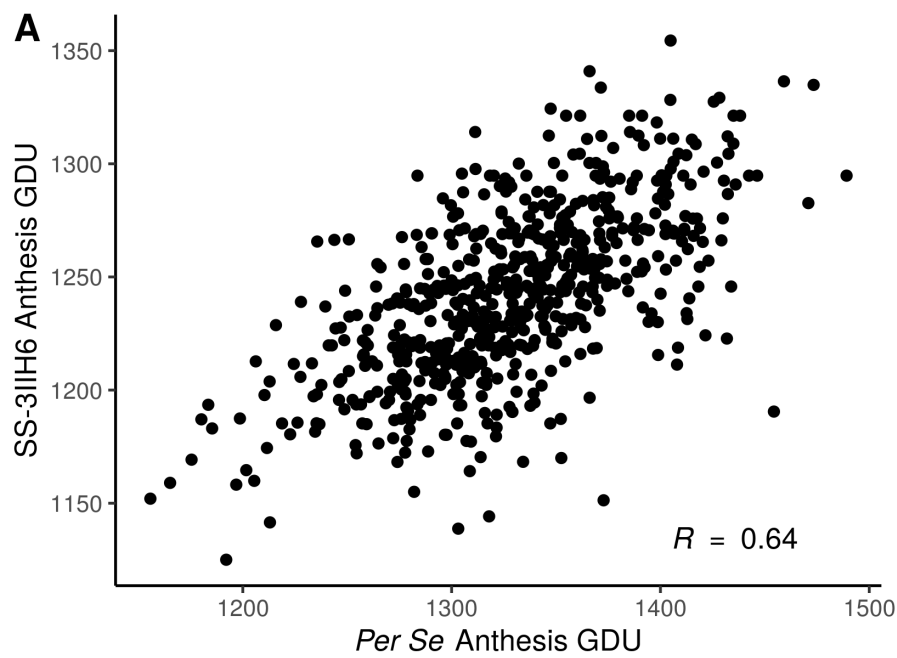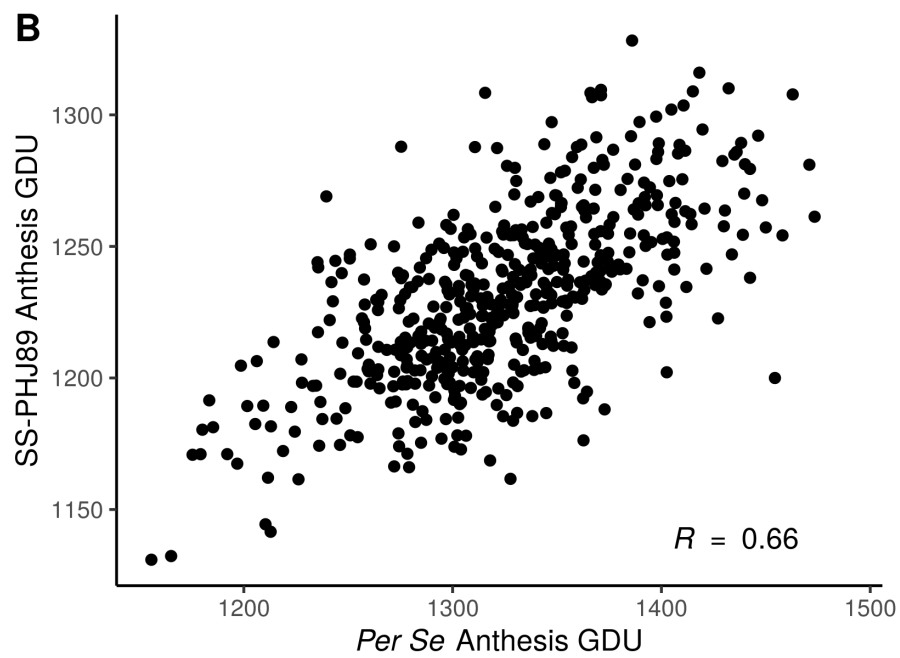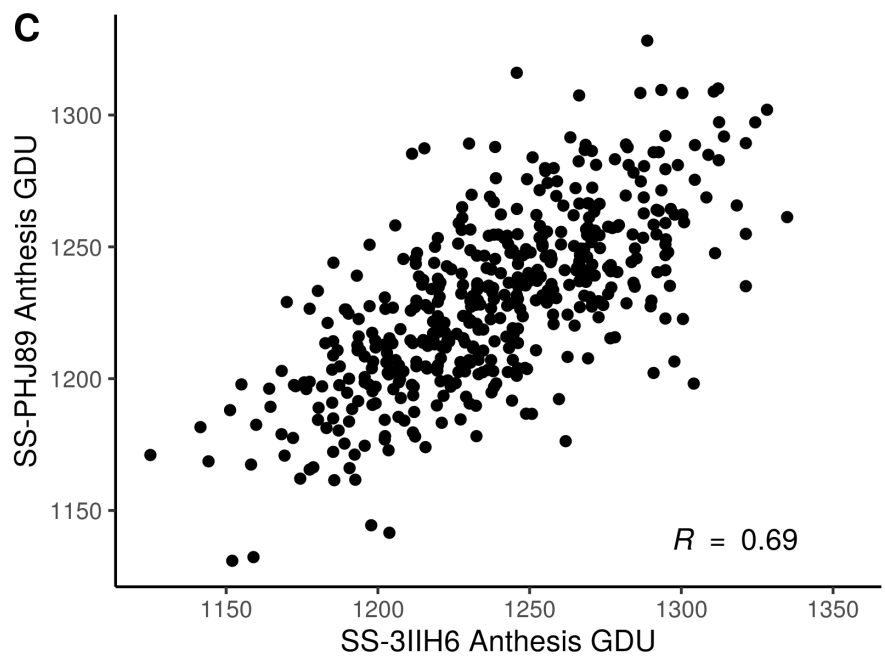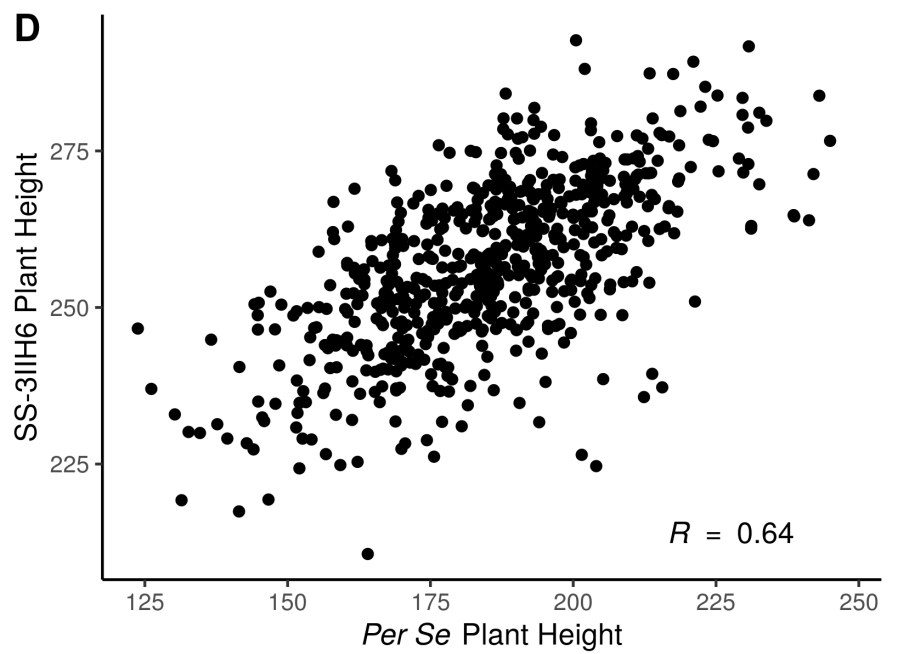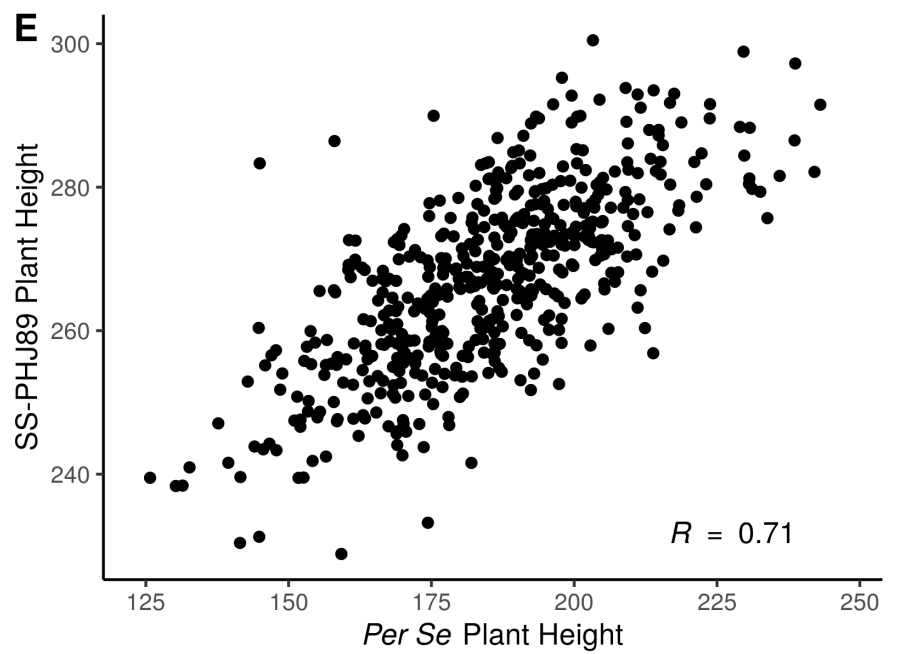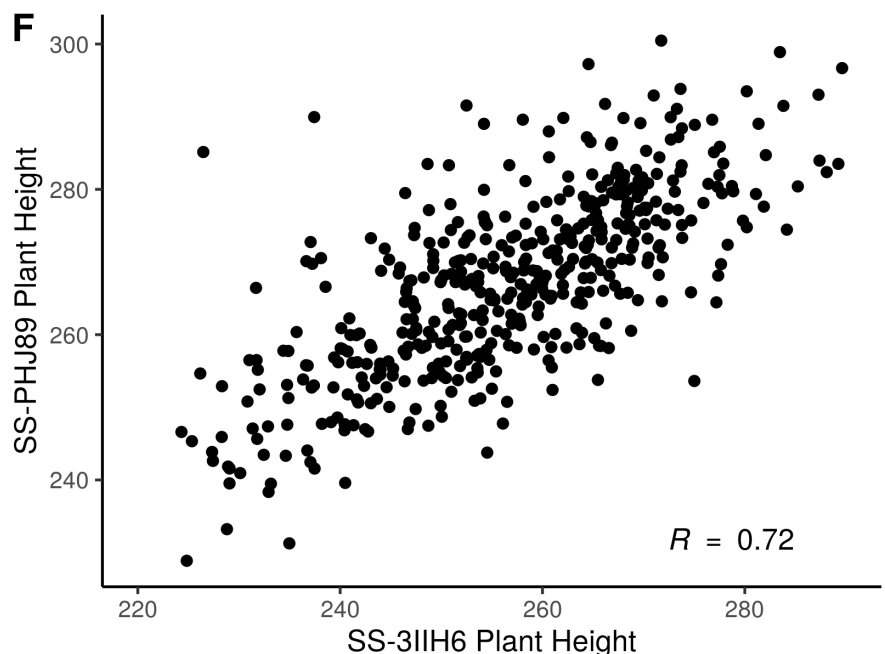



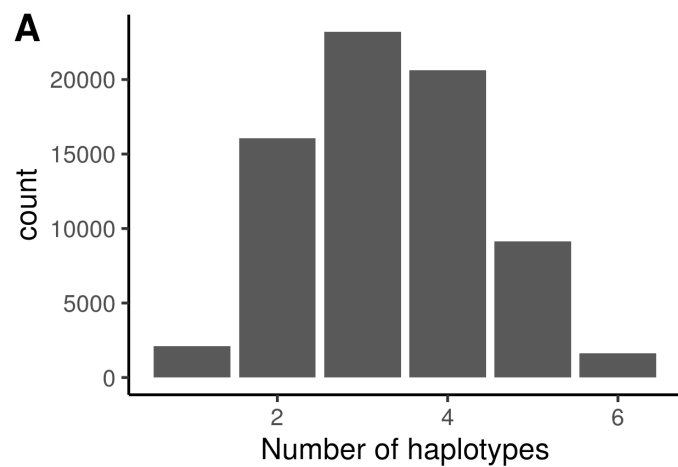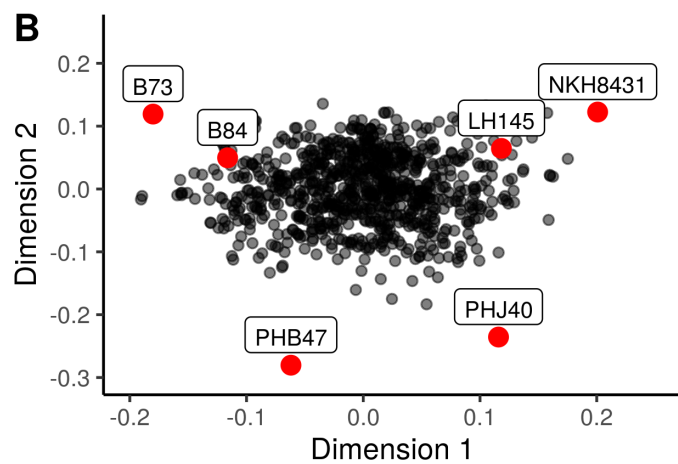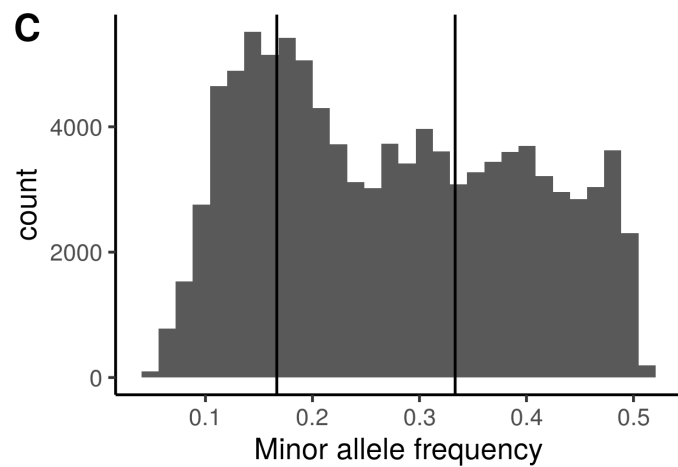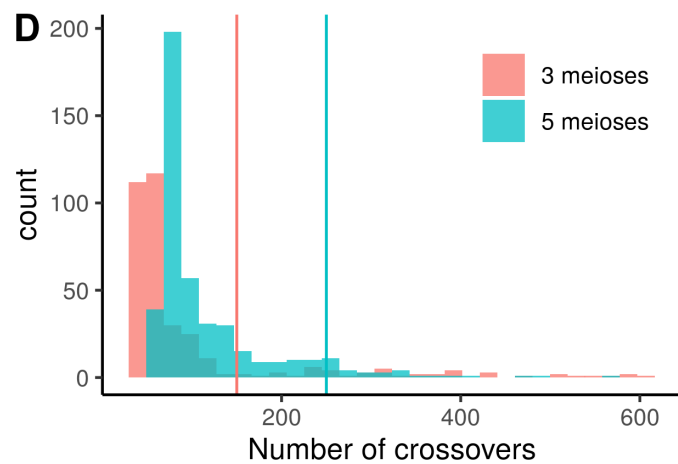

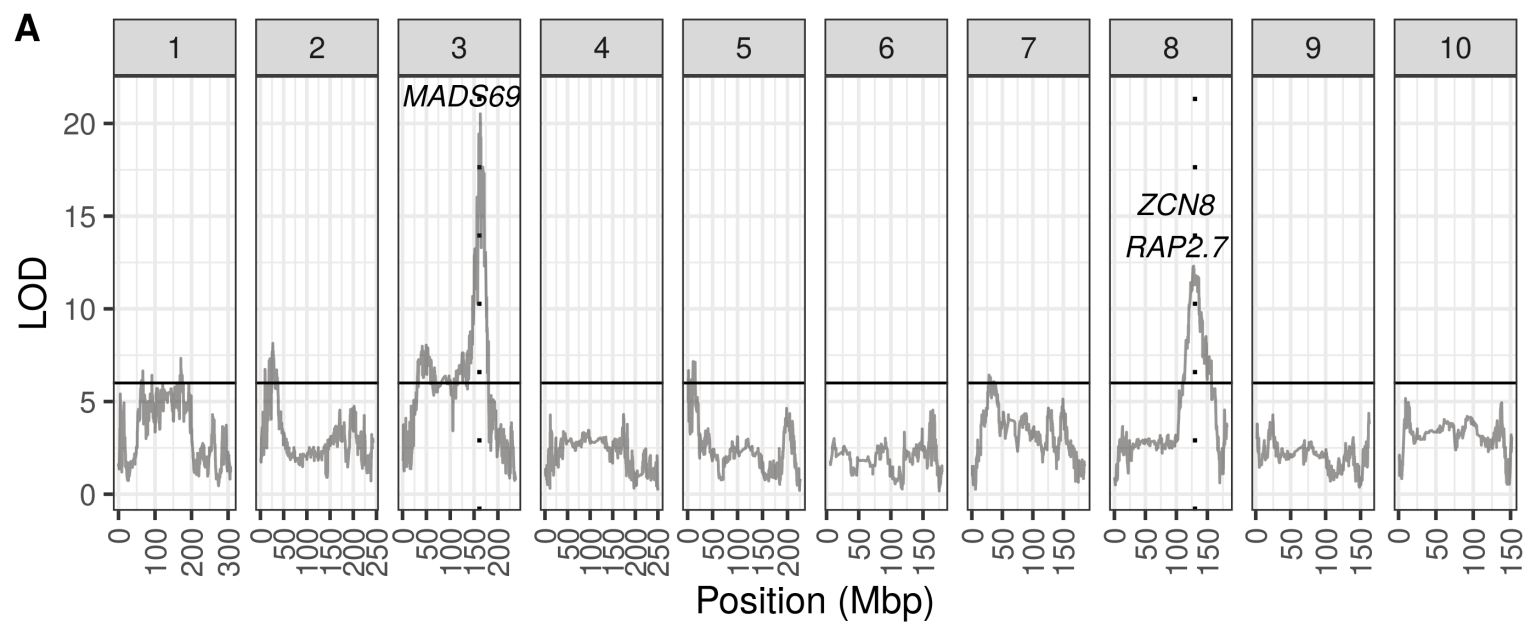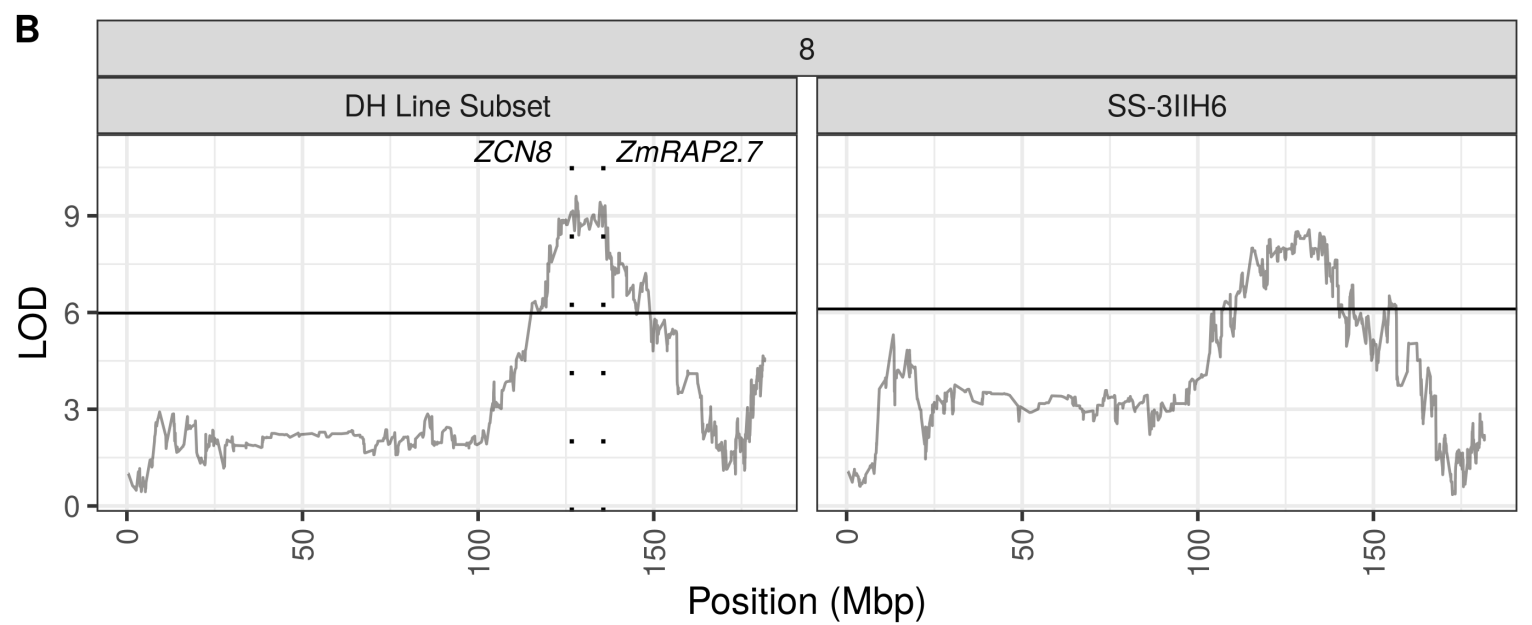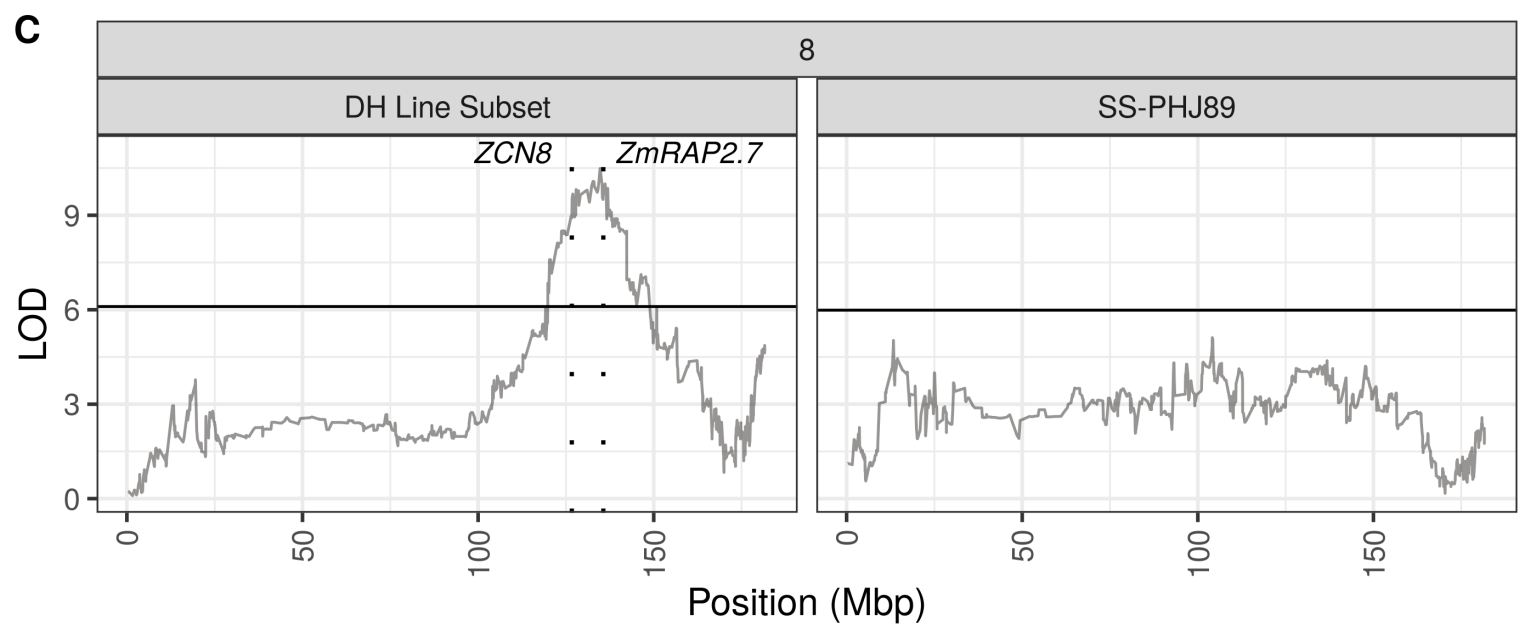

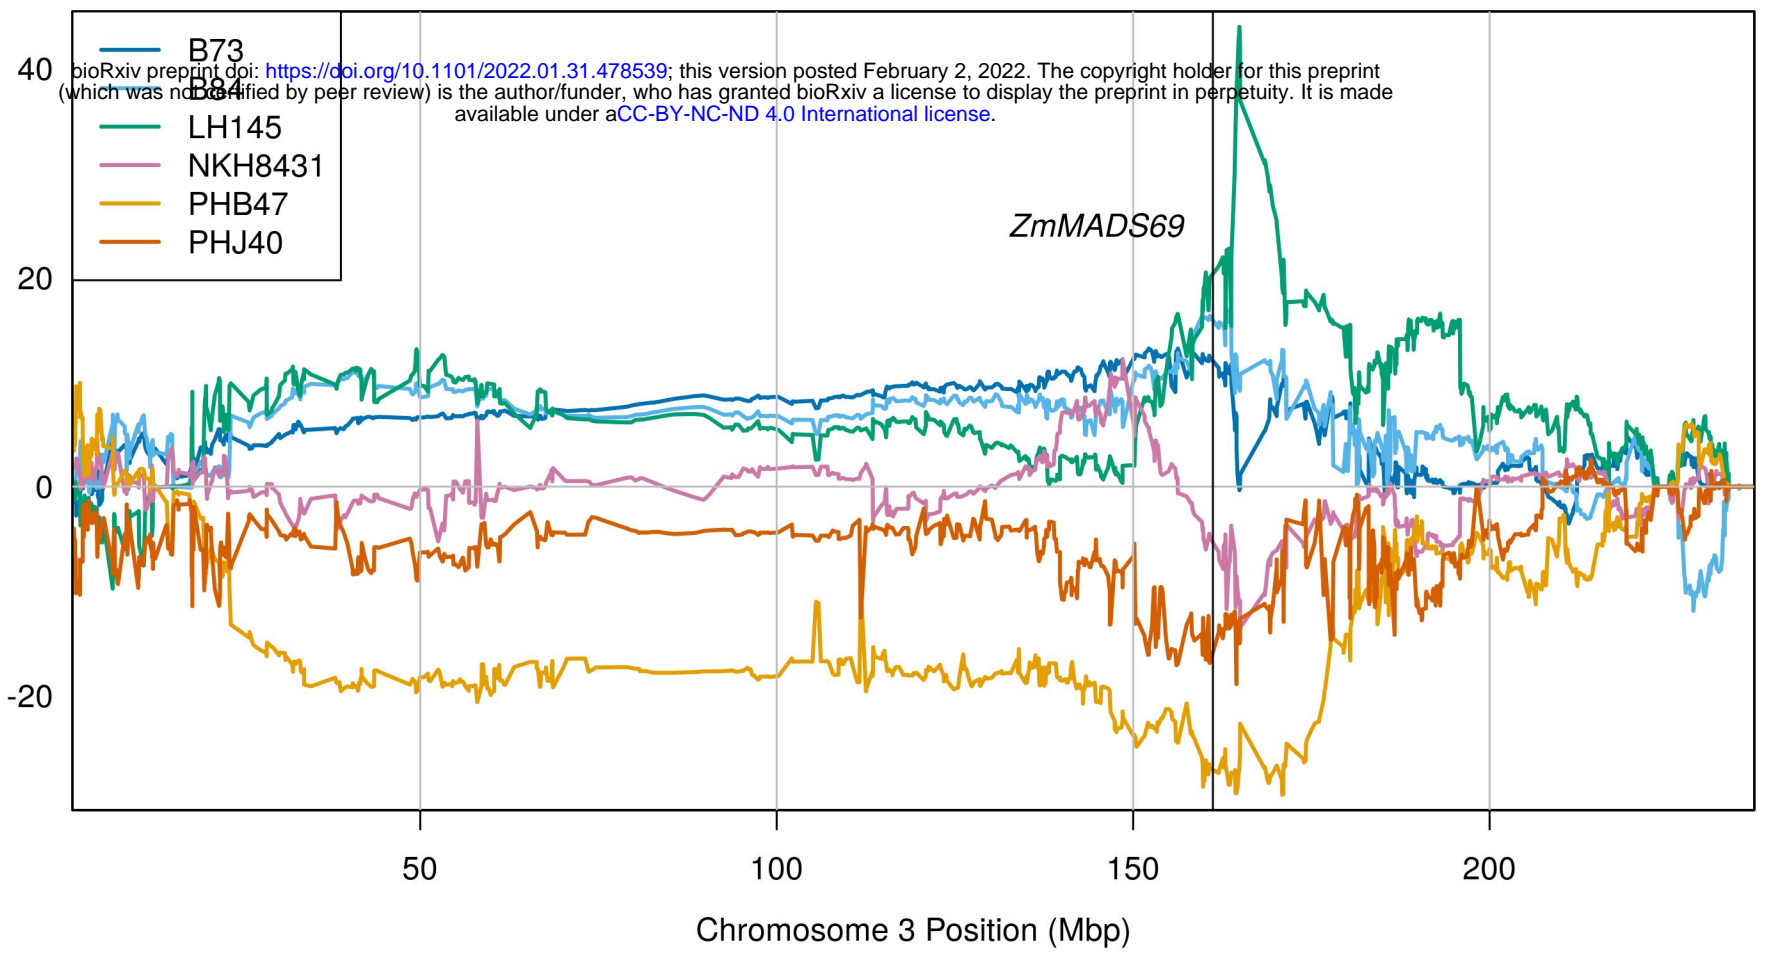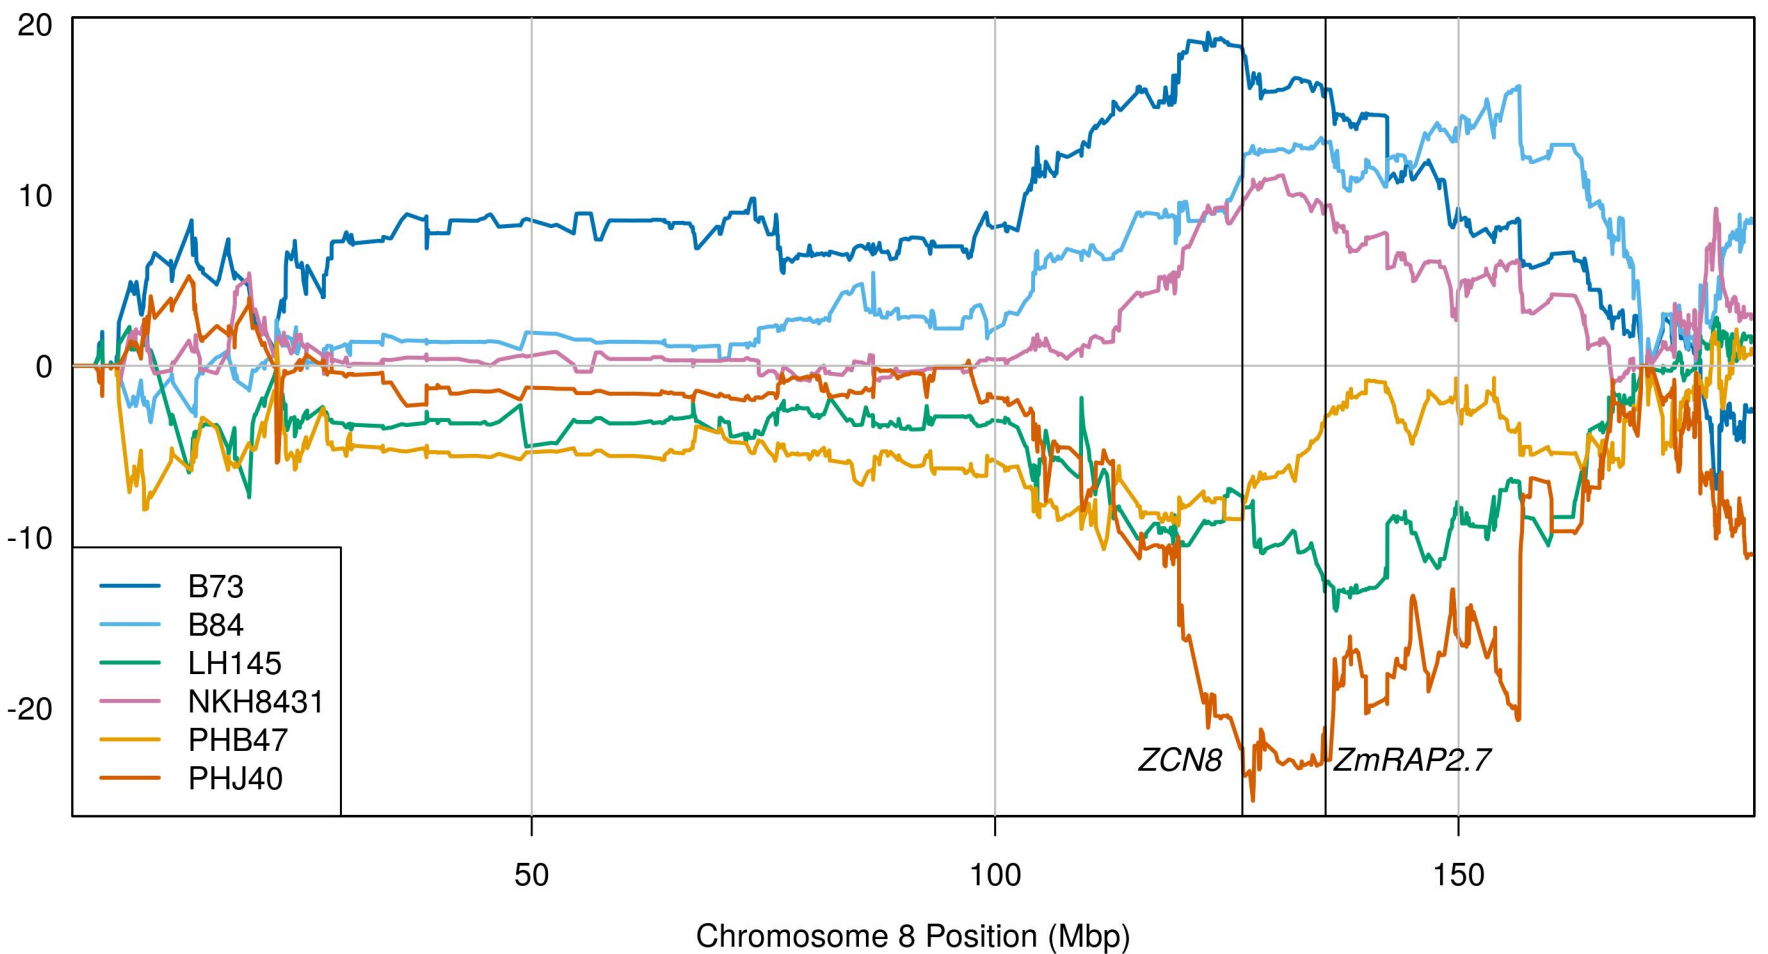

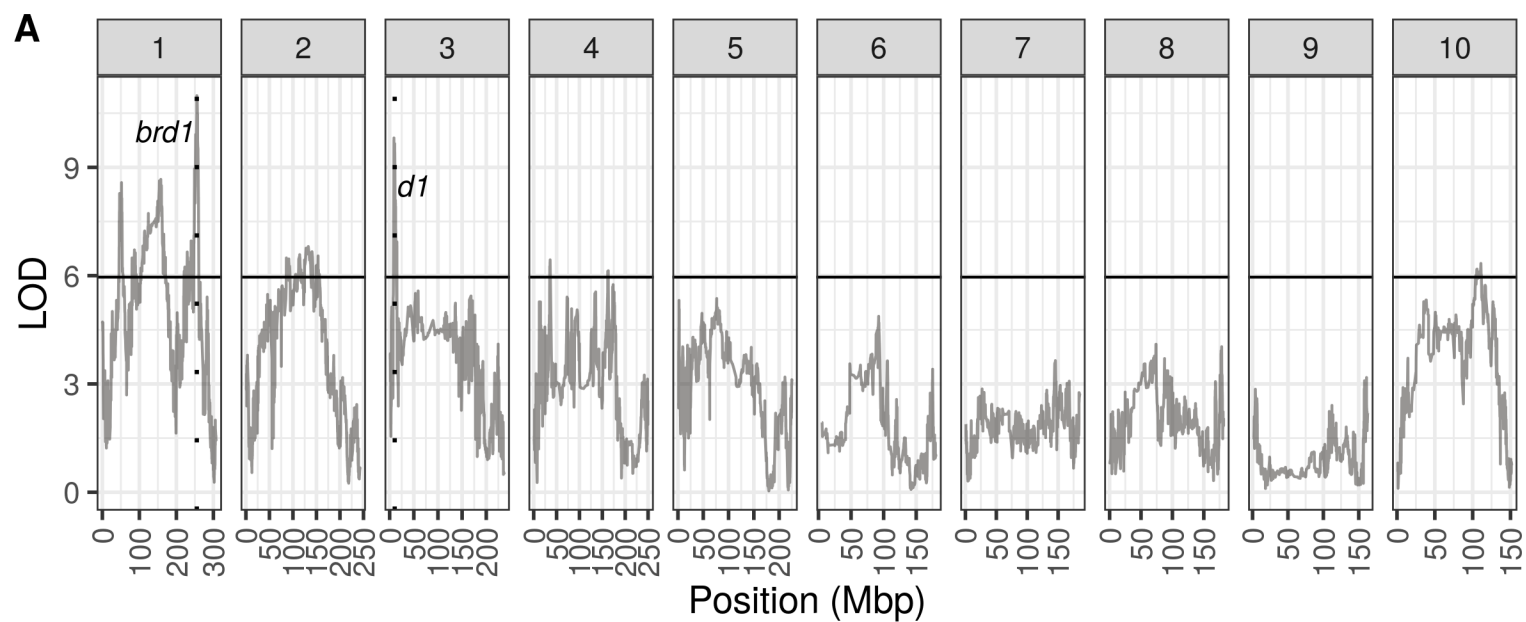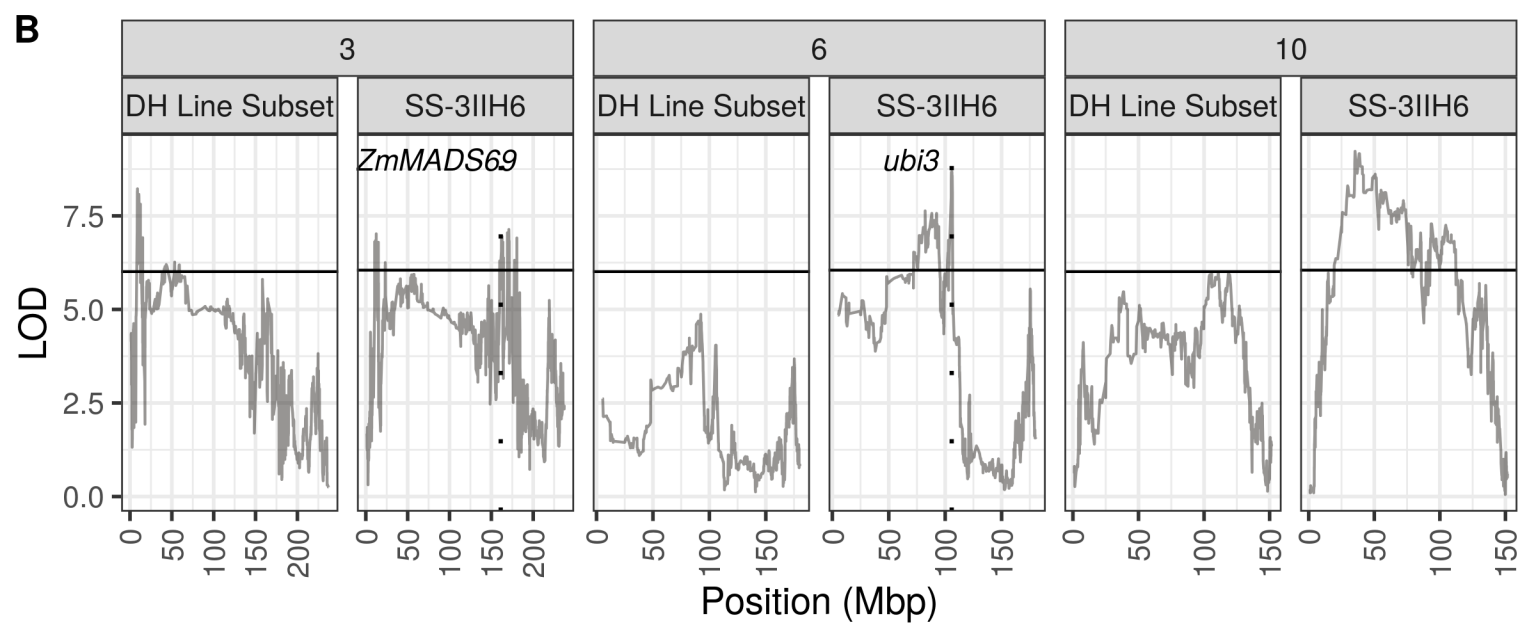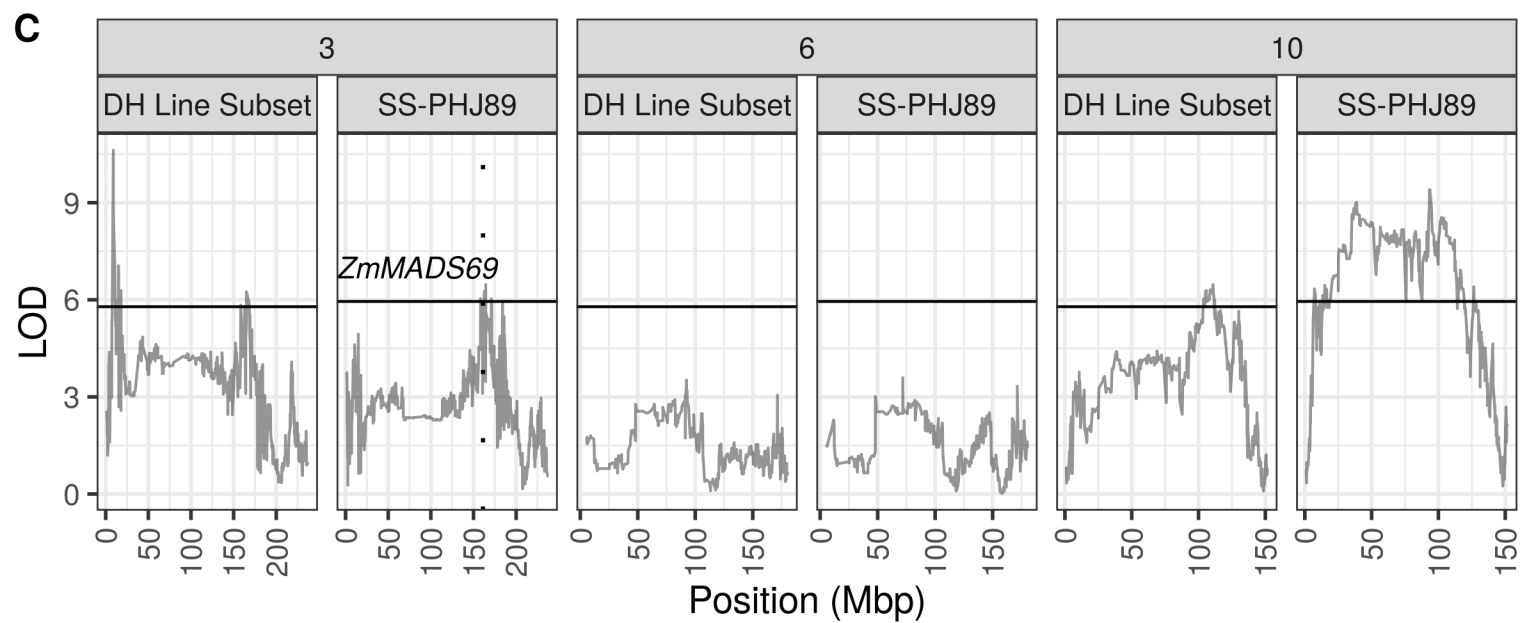

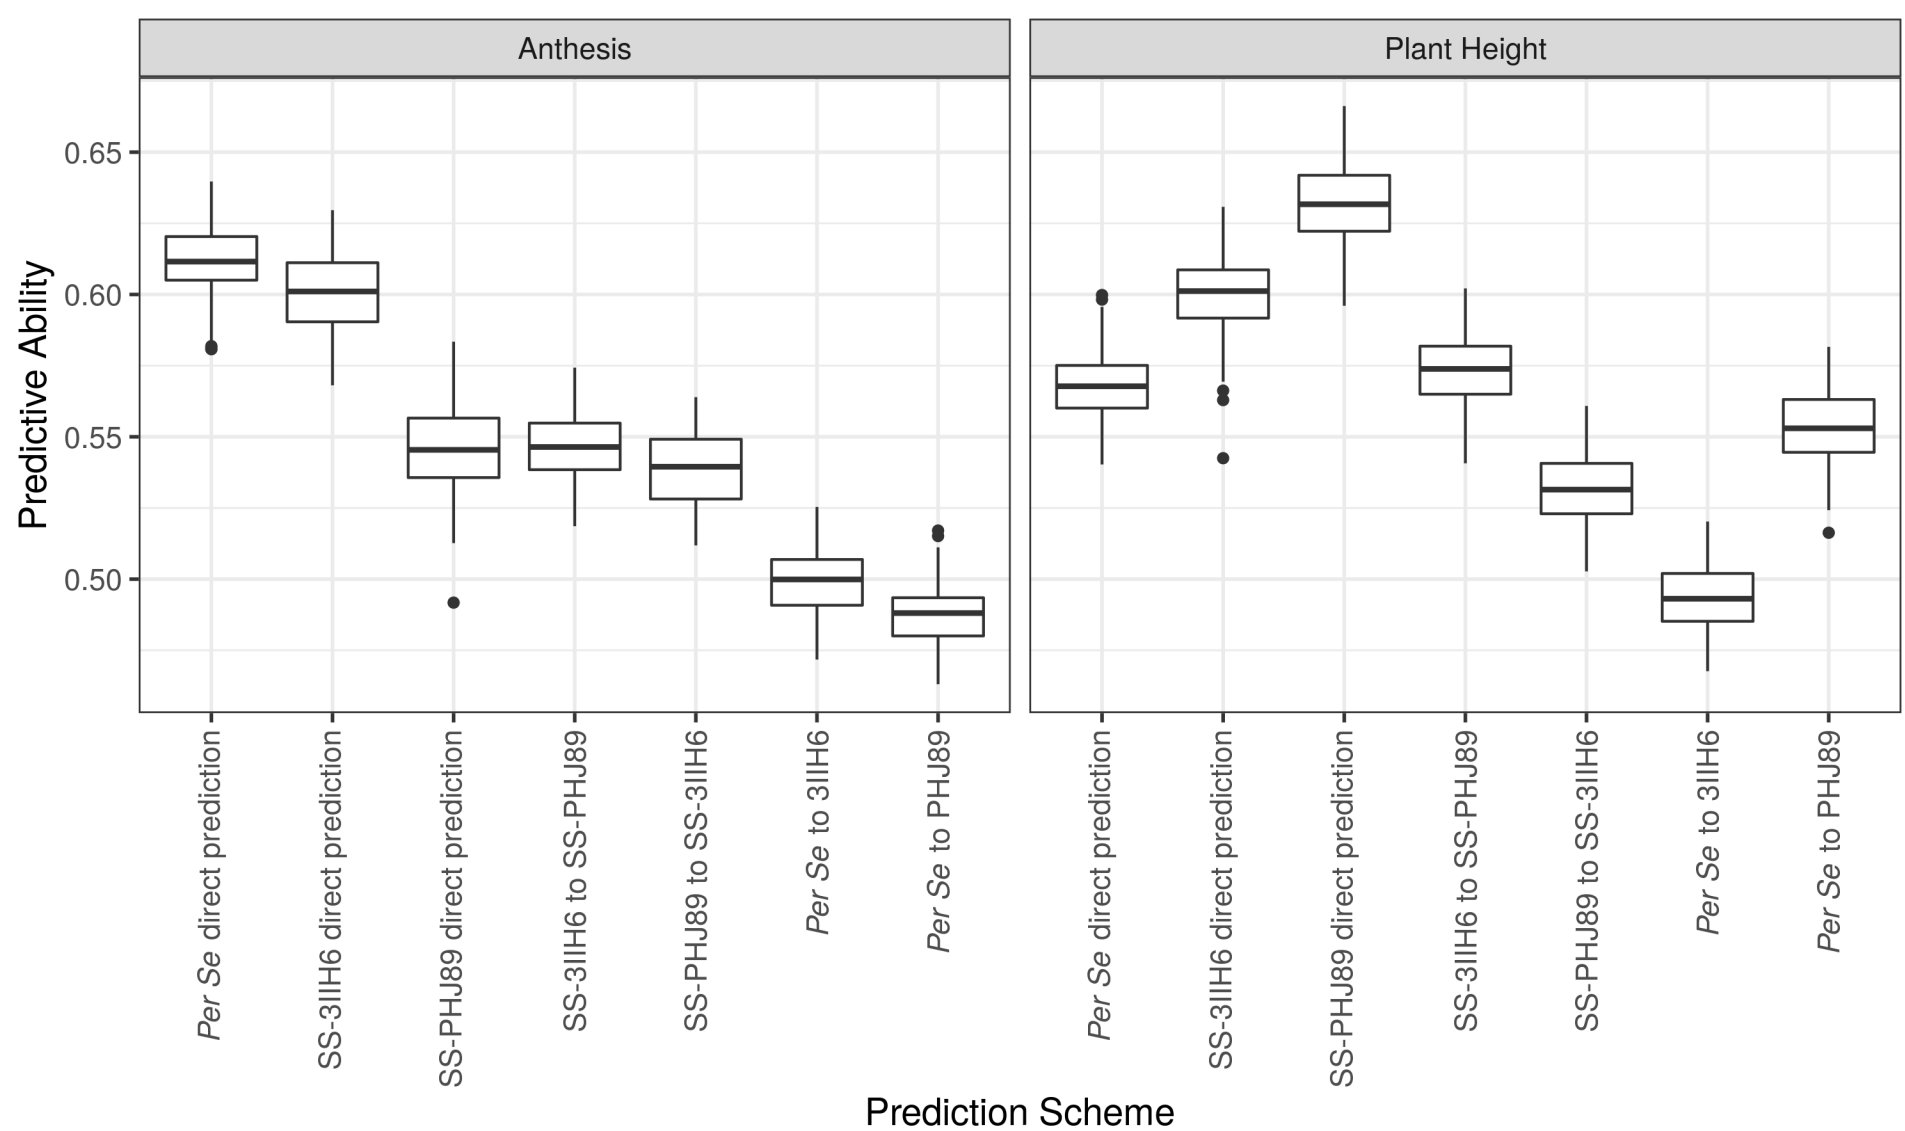

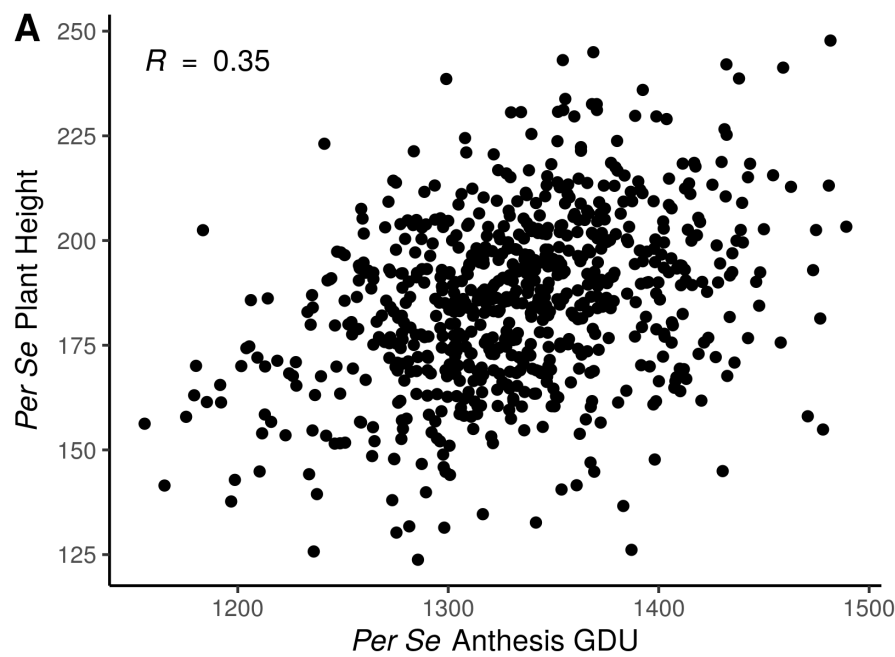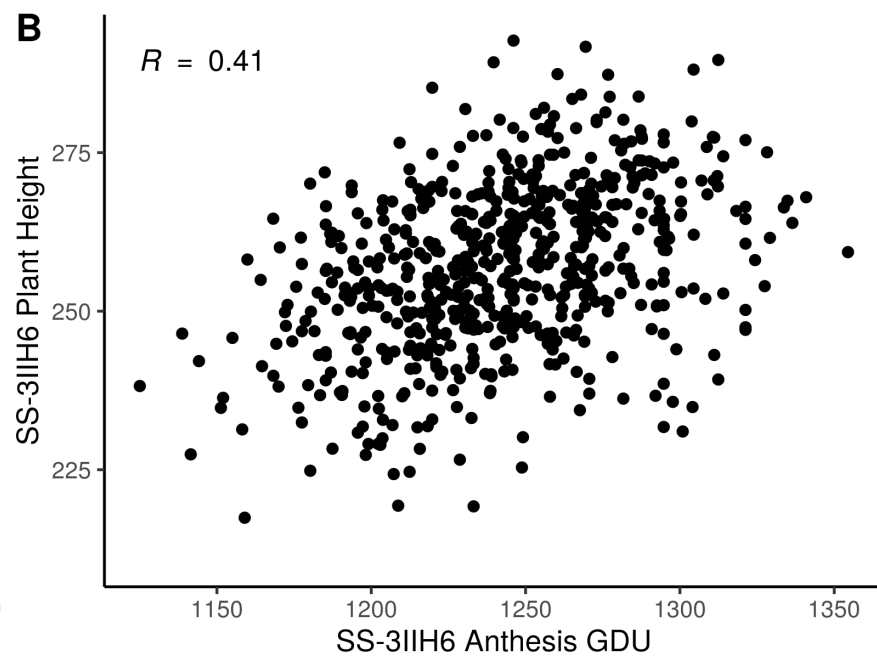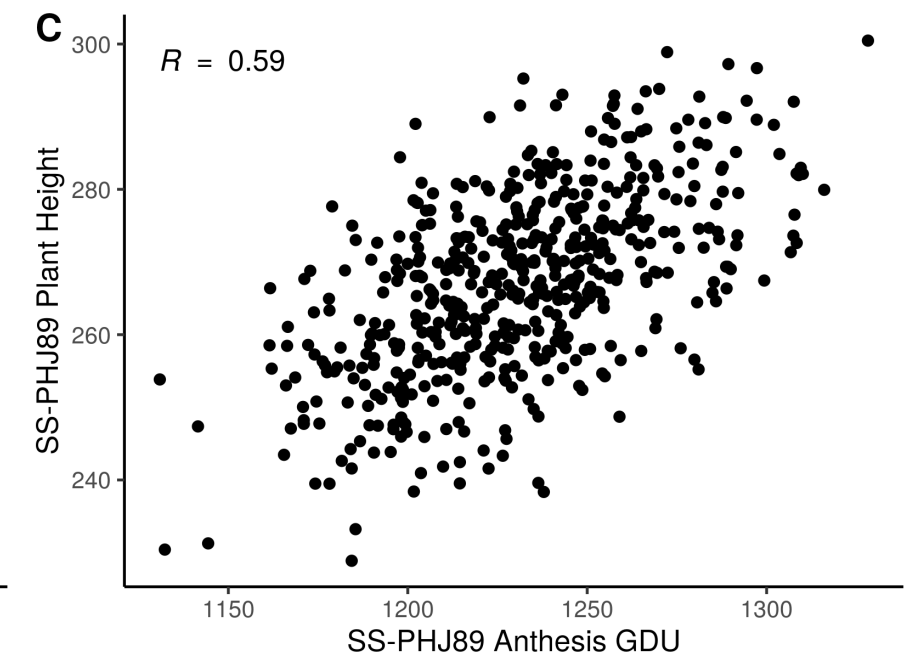

**W10004\_0078**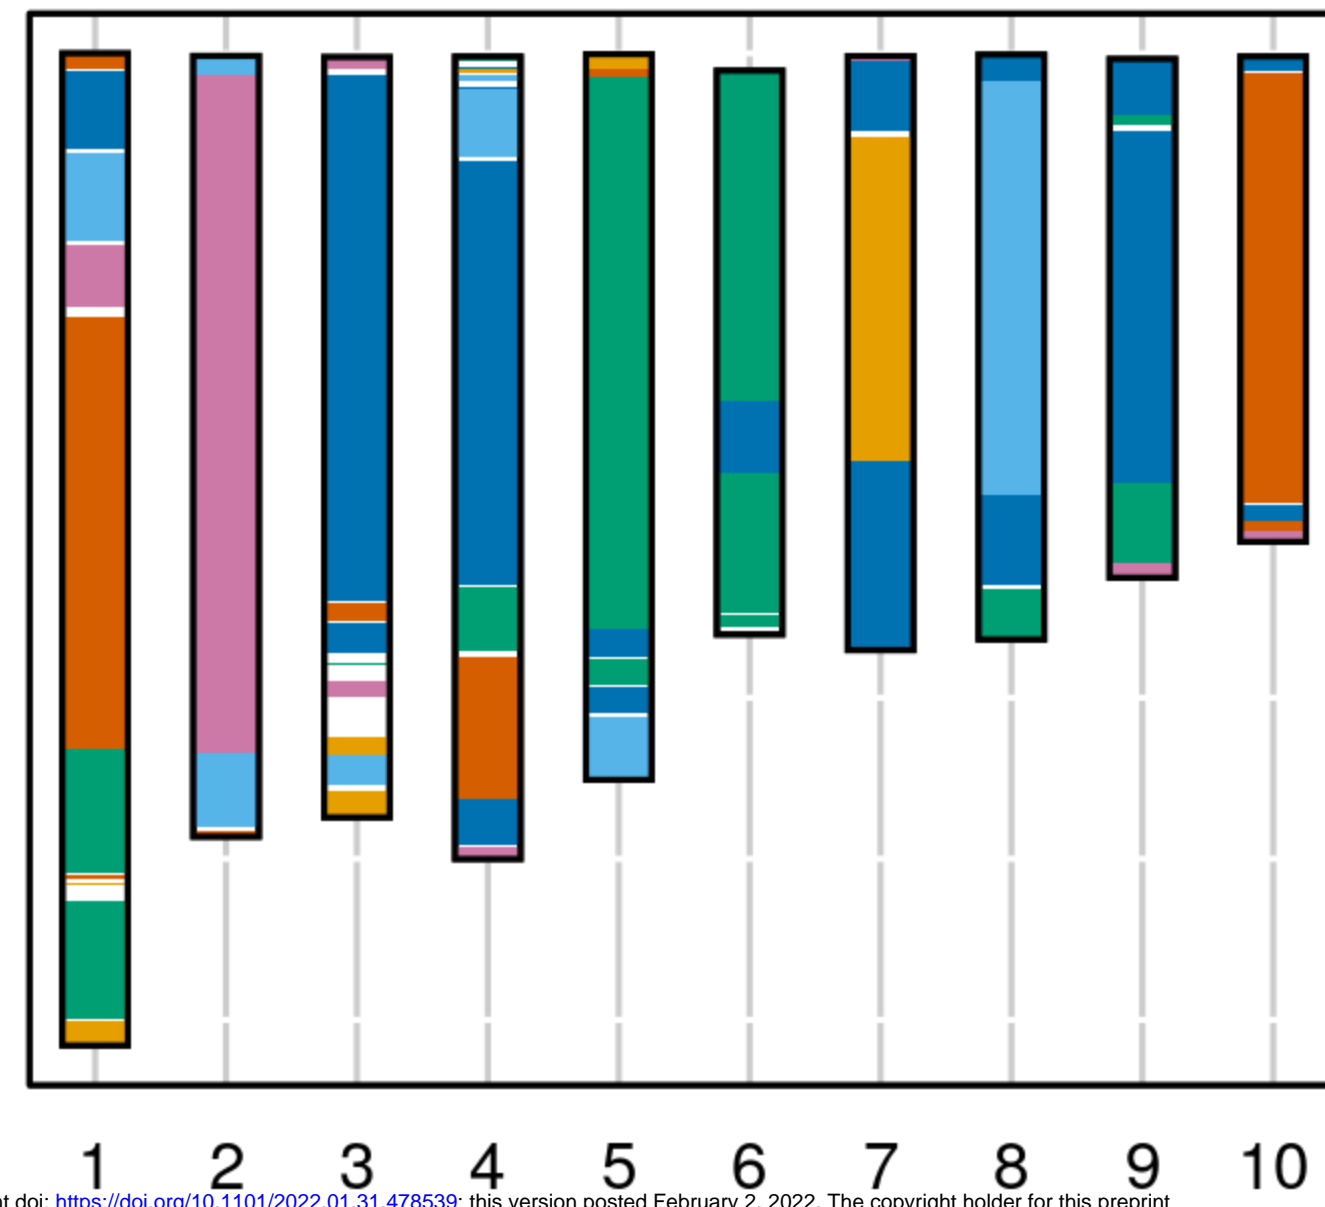

bioRxiv preprint doi: <https://doi.org/10.1101/2022.01.31.478539>; this version posted February 2, 2022. The copyright holder for this preprint (which was not certified by peer review) is the author/funder, who has granted bioRxiv a license to display the preprint in perpetuity. It is made available under aCC-BY-NC-ND 4.0 International license.

Chromosome

**W10004\_0149**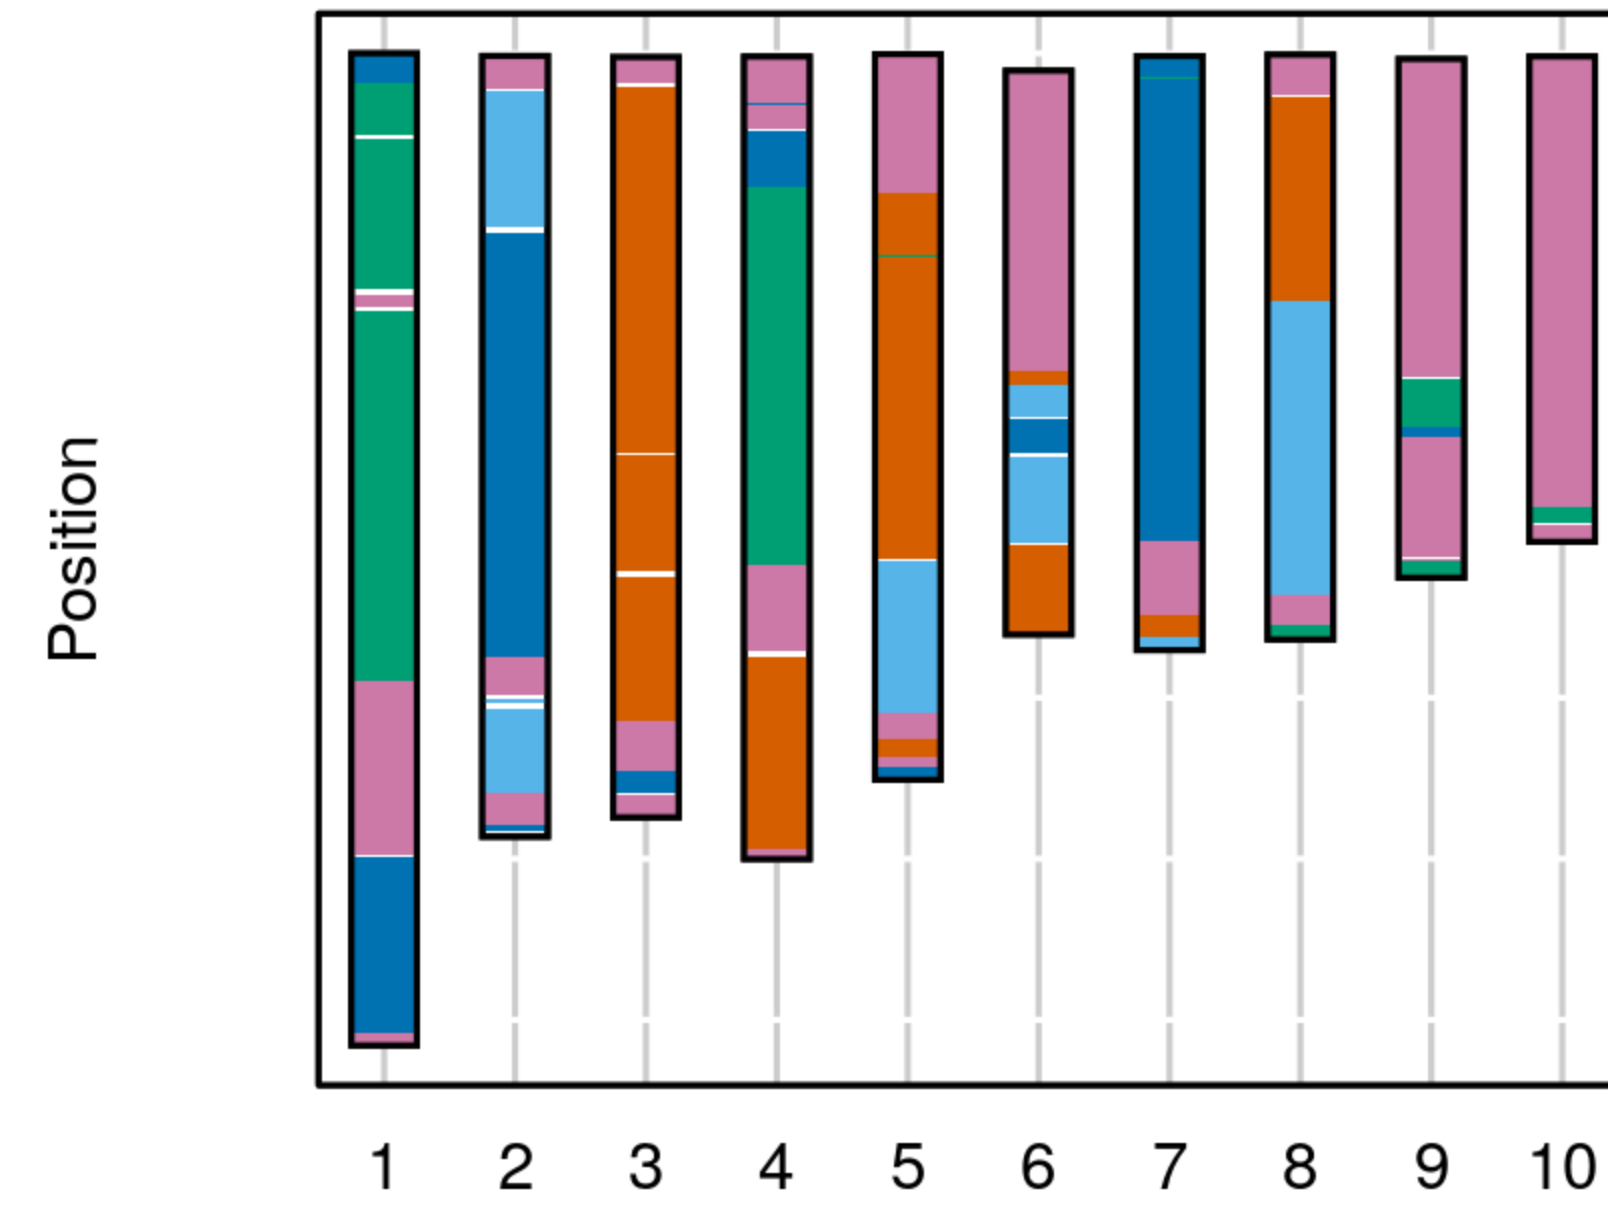

Chromosome

**W10004\_0265**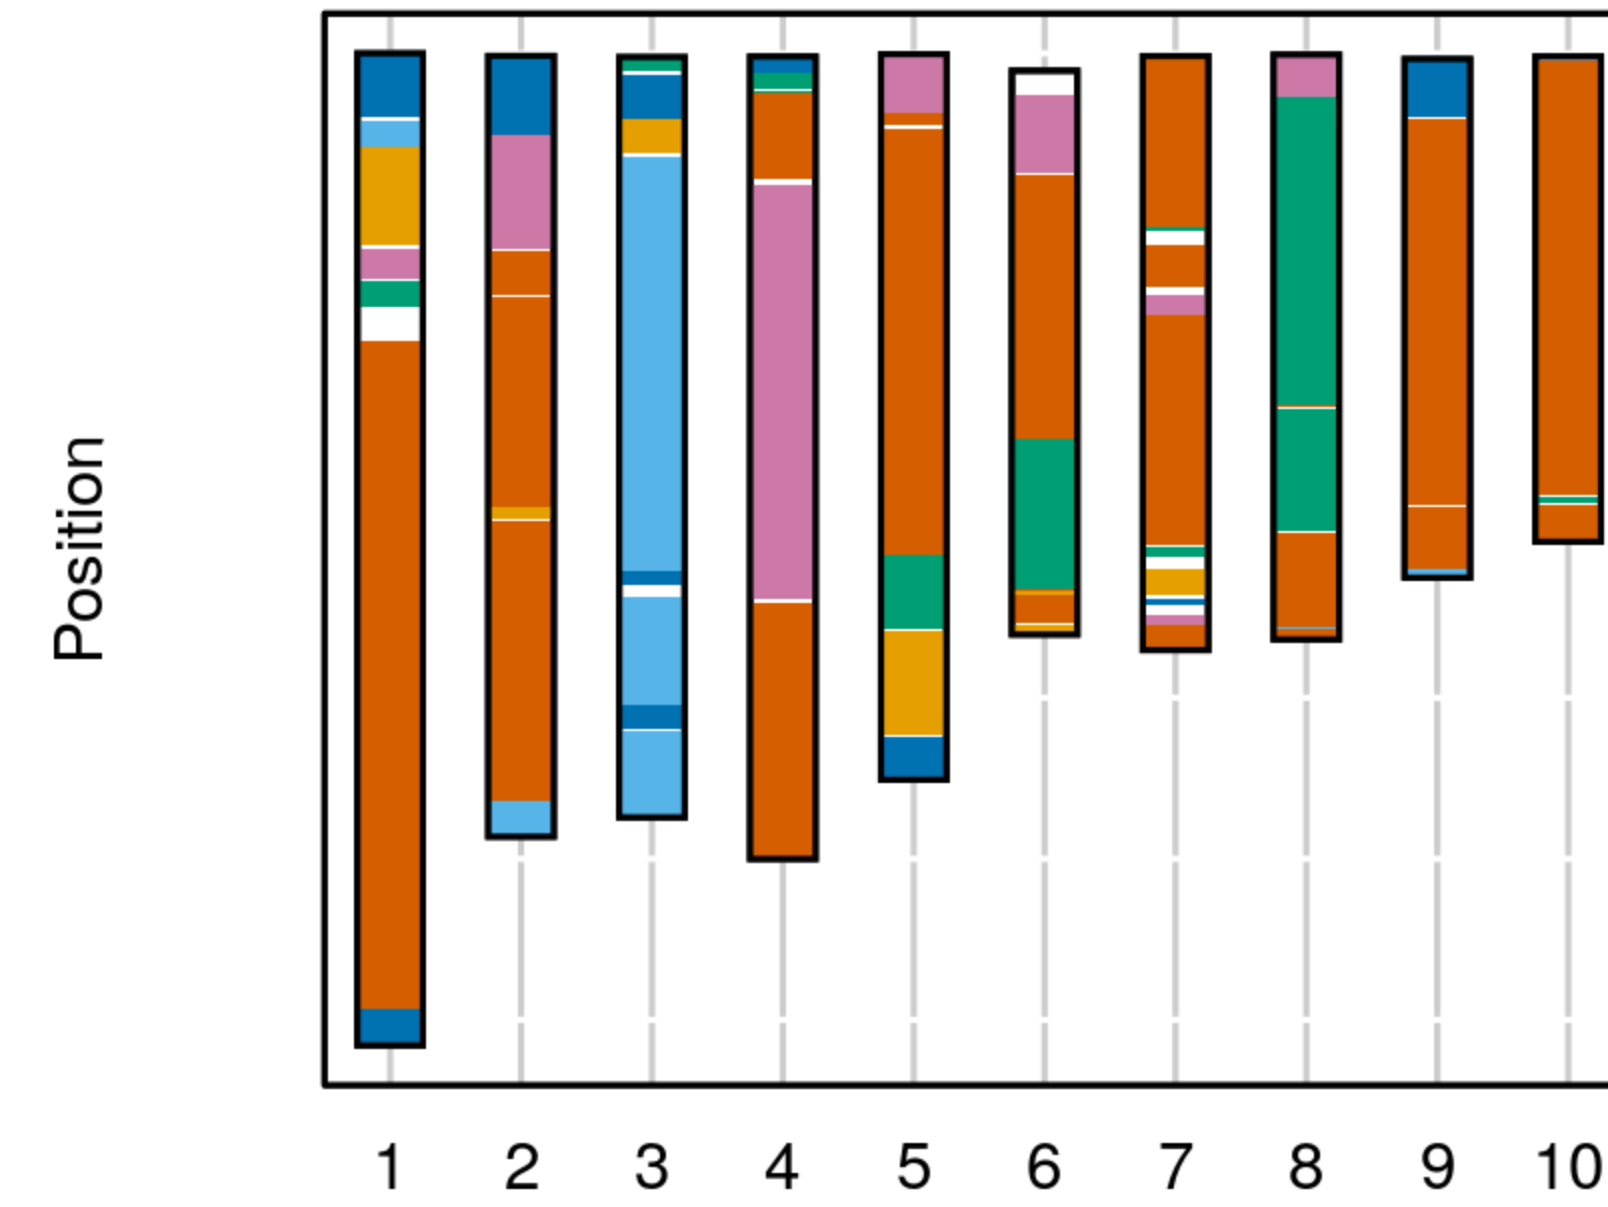

Chromosome

**W10004\_0454**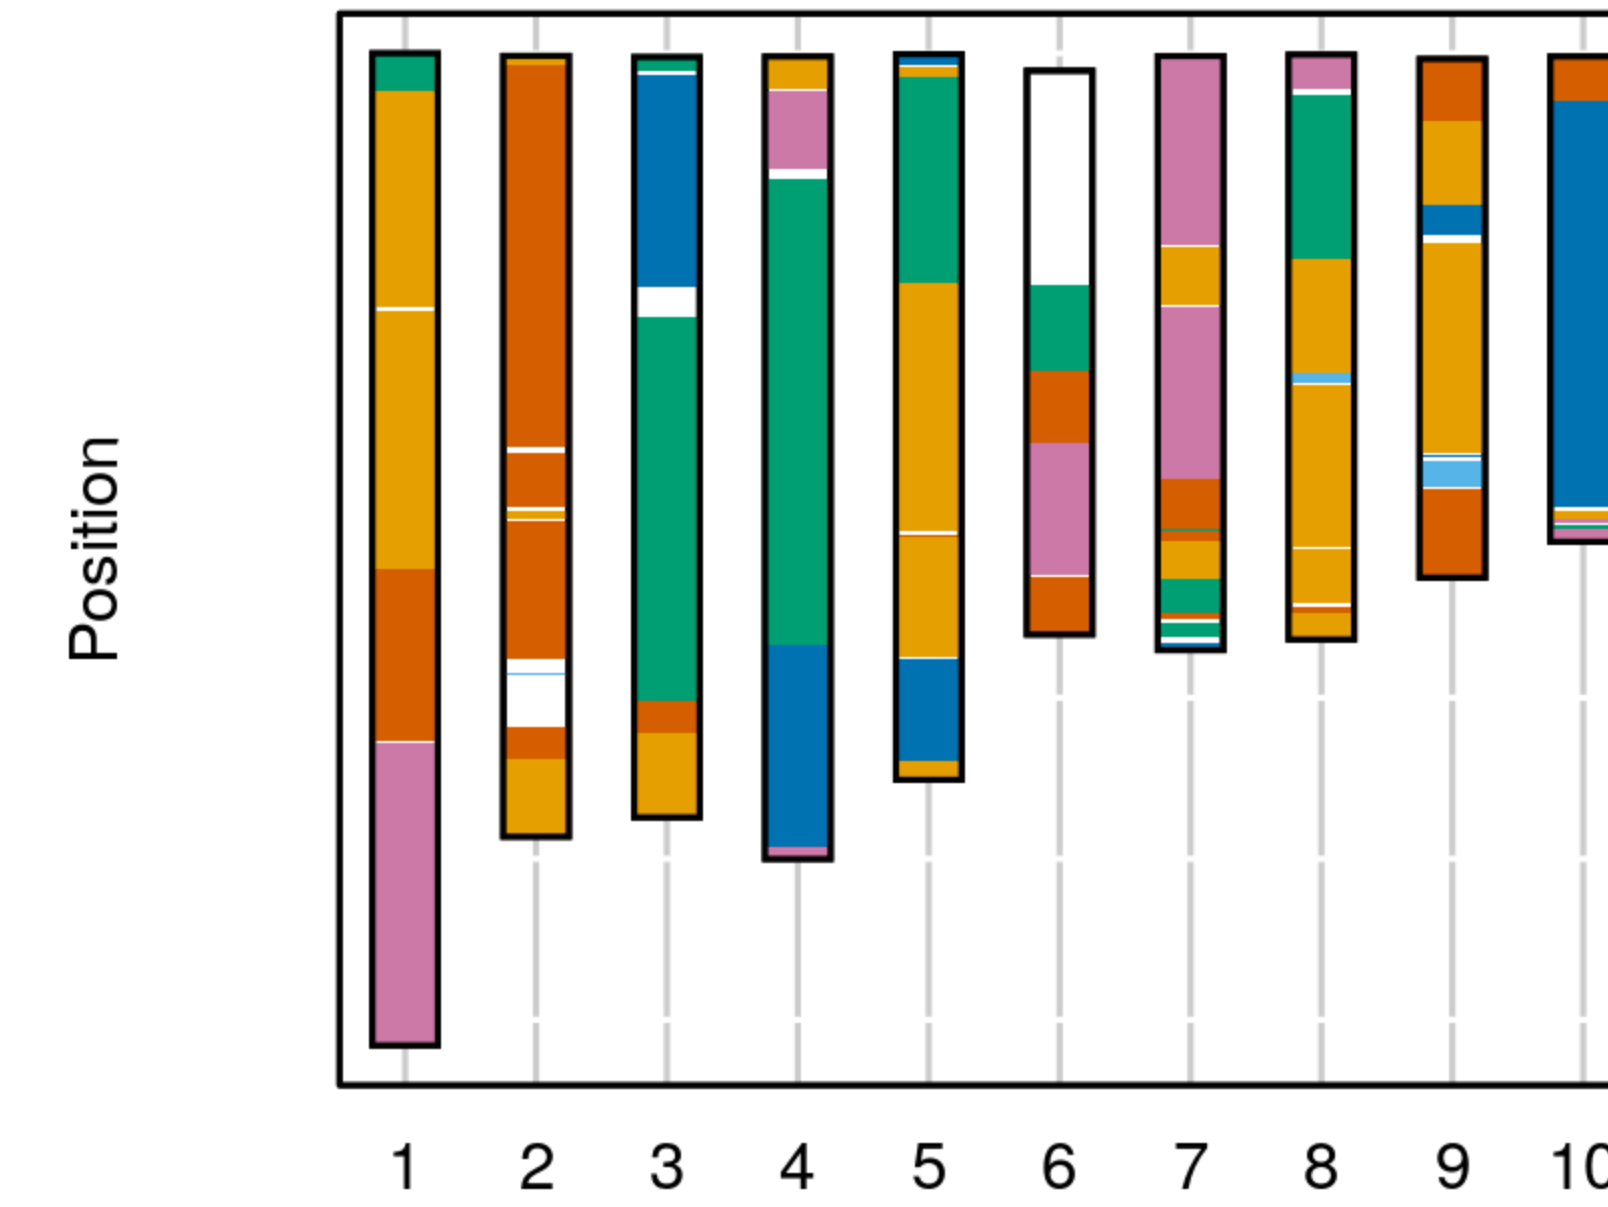

Chromosome

Genotype

- █ B73
- █ B84
- █ LH145
- █ NKH8431
- █ PHB47
- █ PHJ40

**W10004\_0634**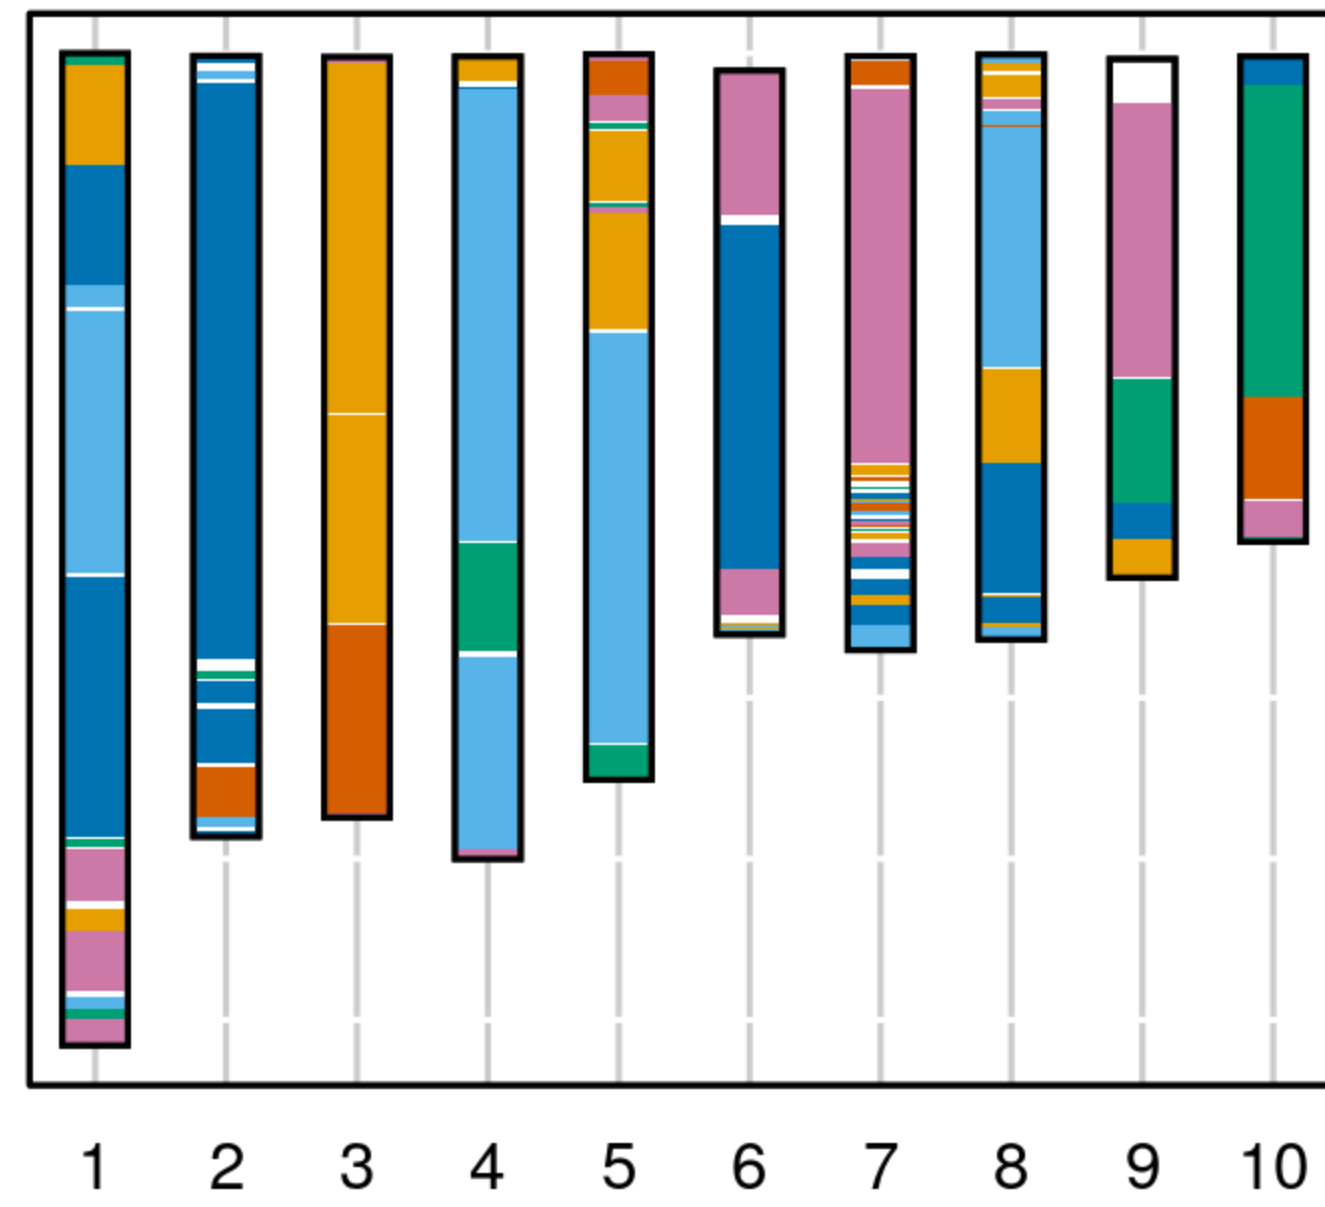

Chromosome

**W10004\_0722**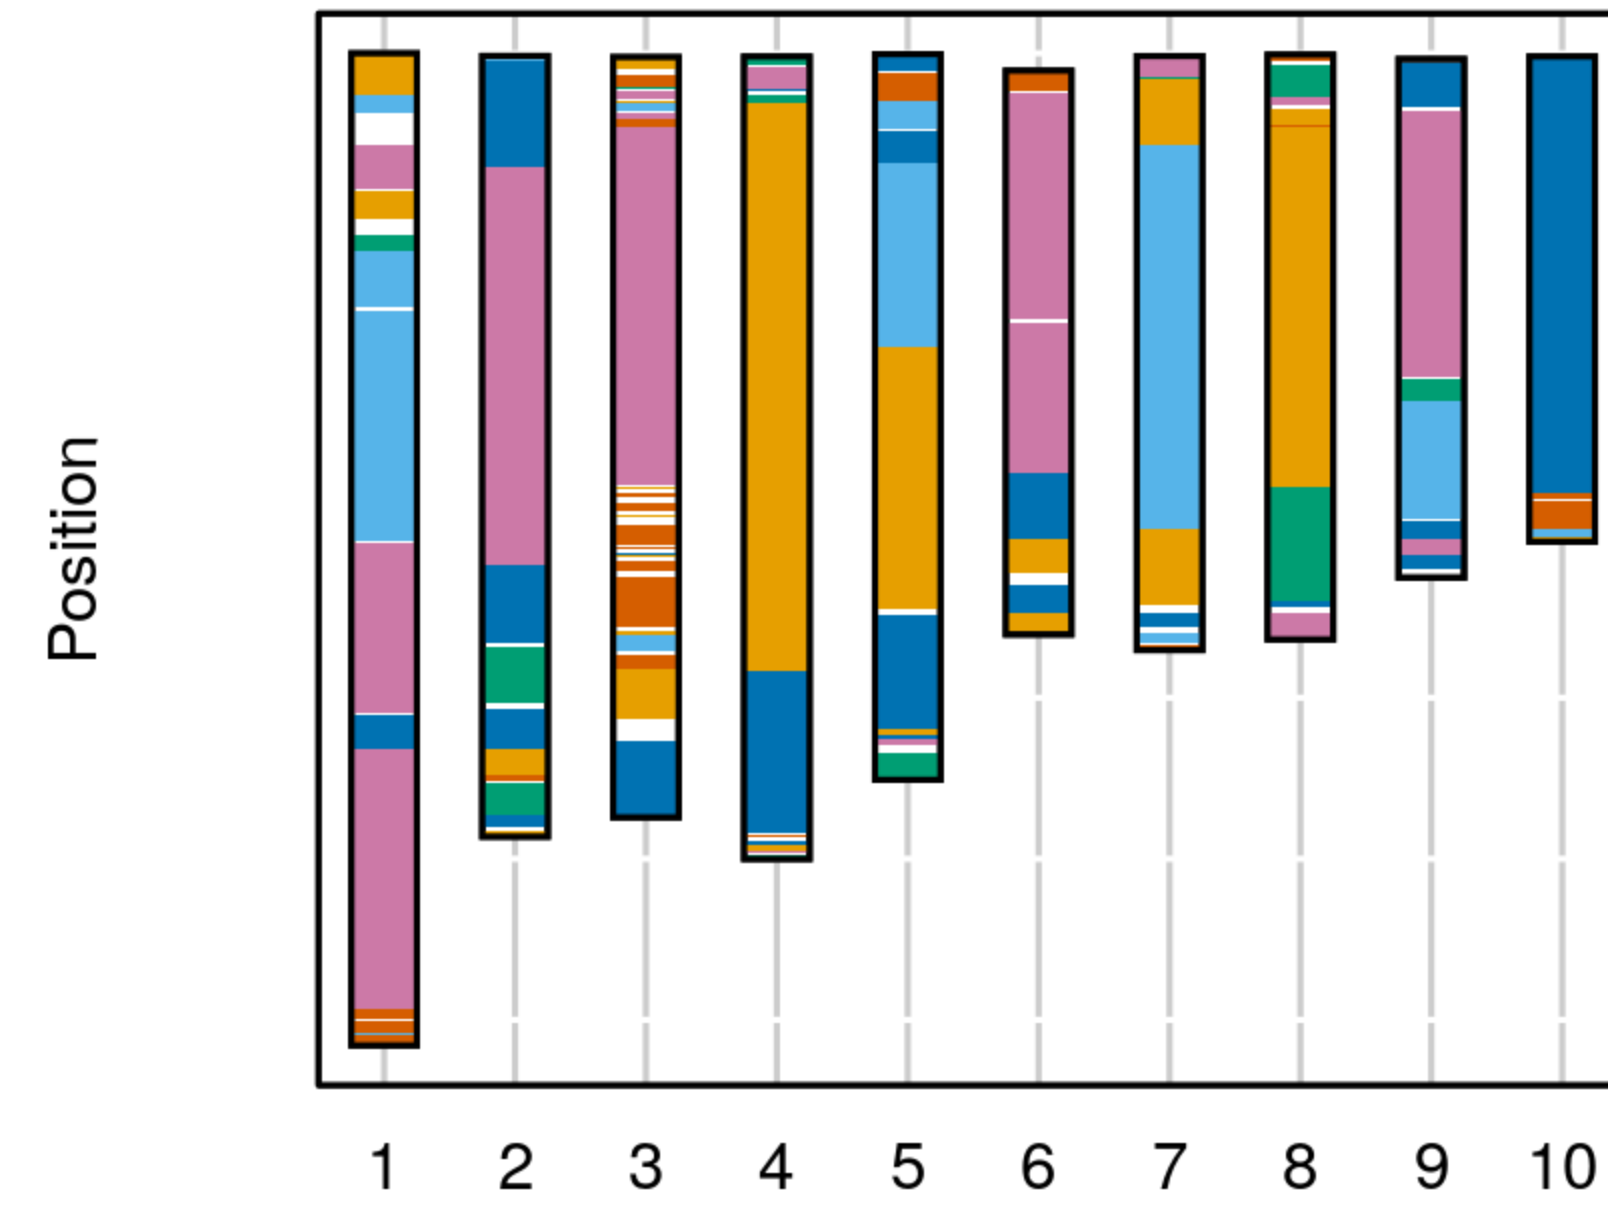

Chromosome

**W10004\_0950**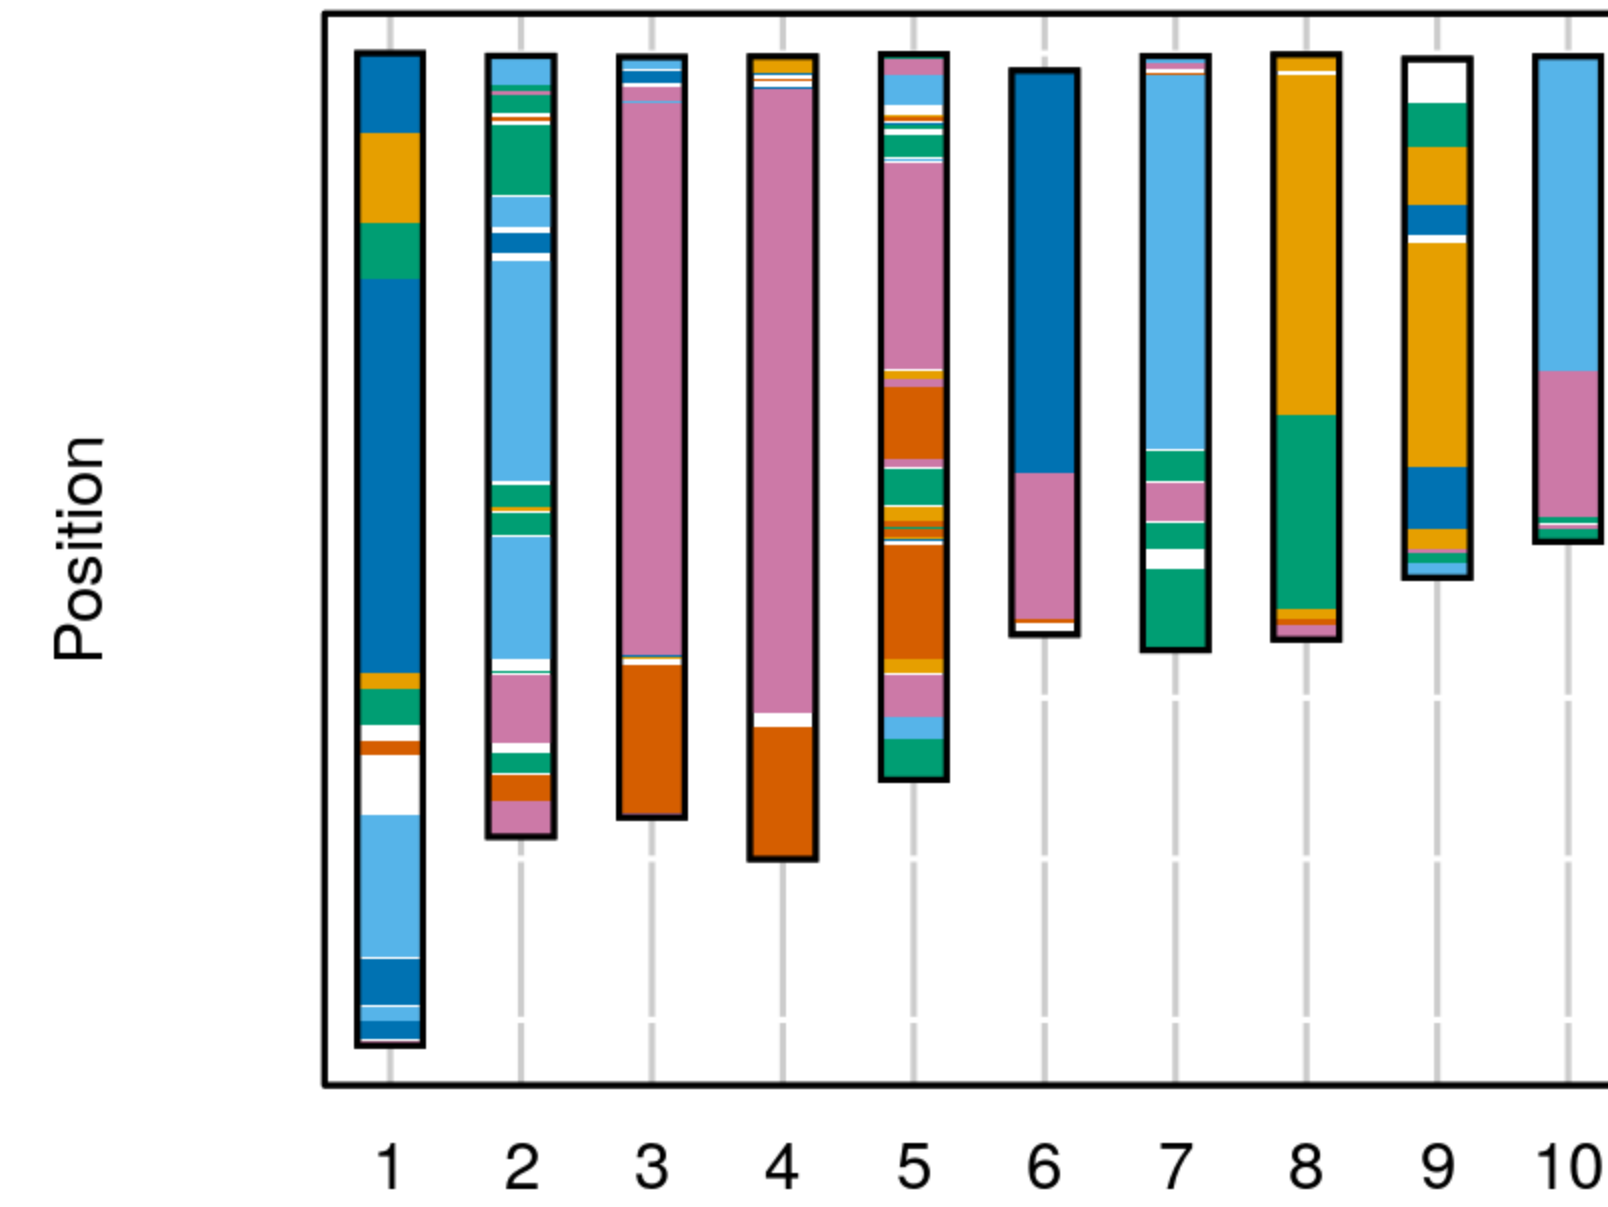

Chromosome

**W10004\_1148**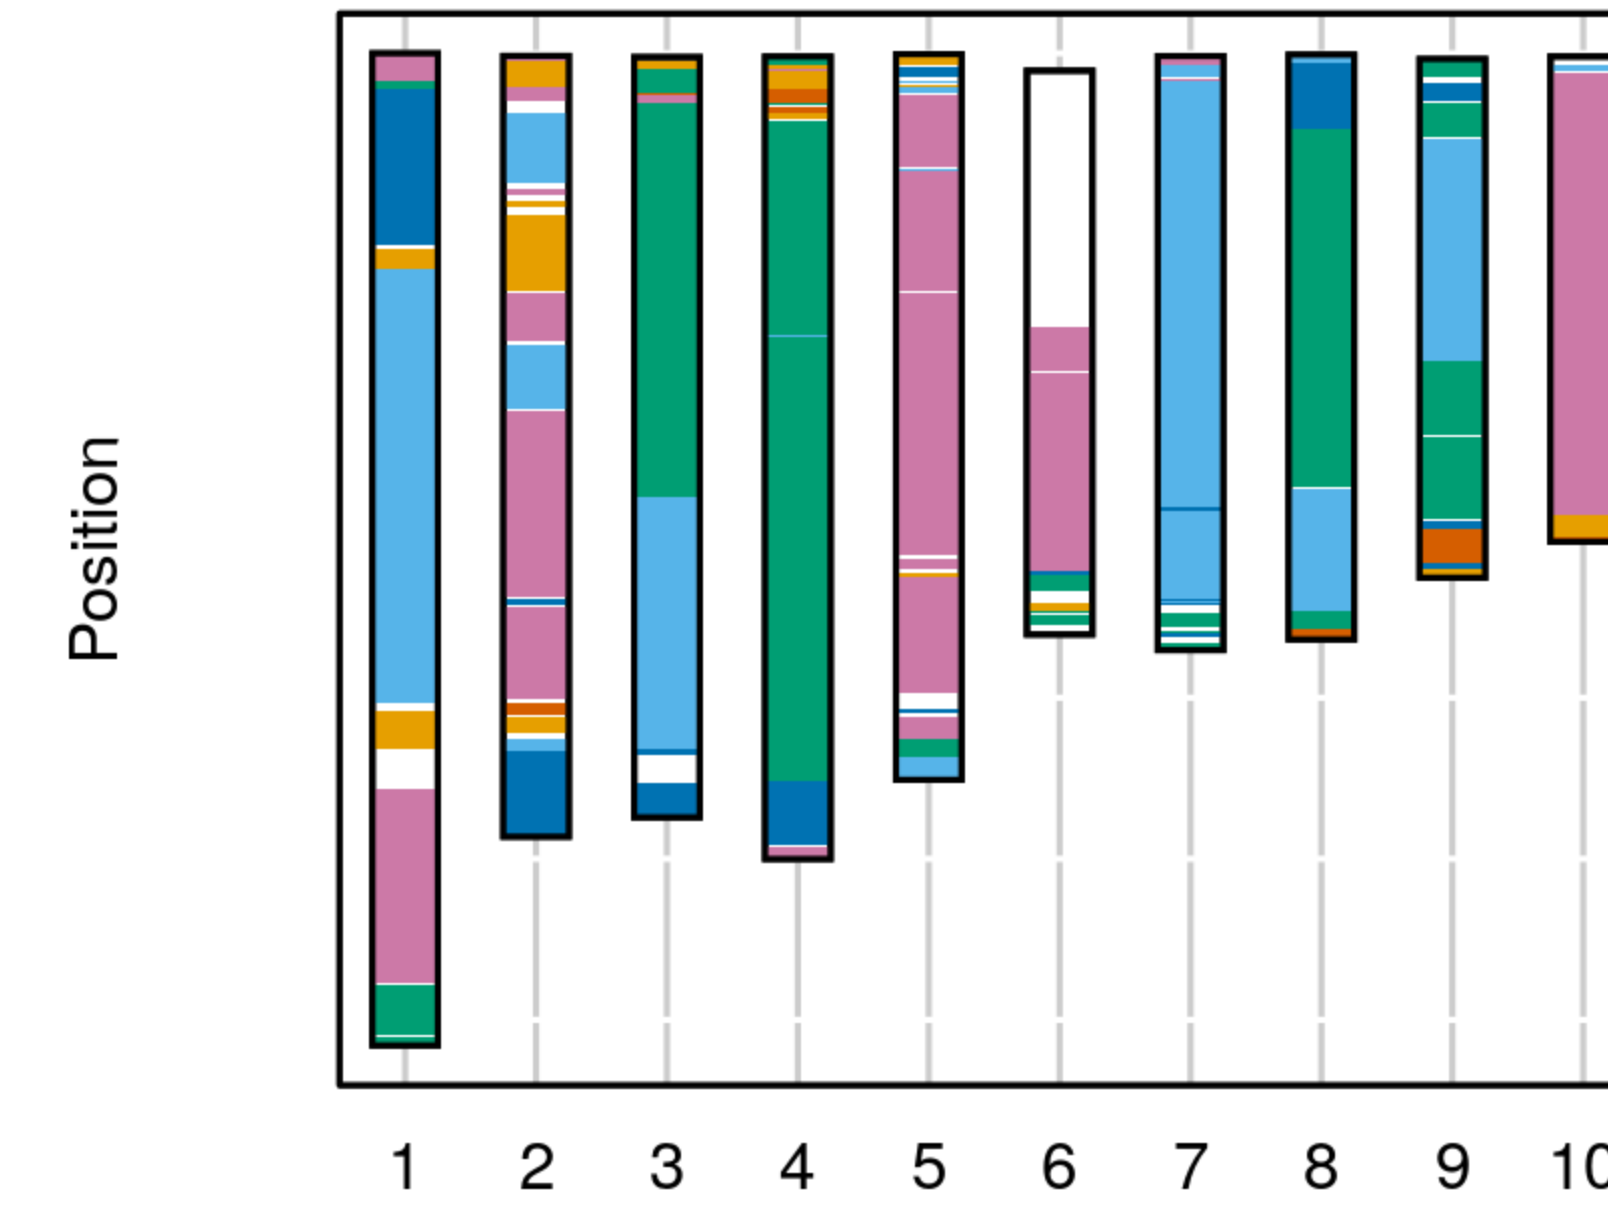

Chromosome

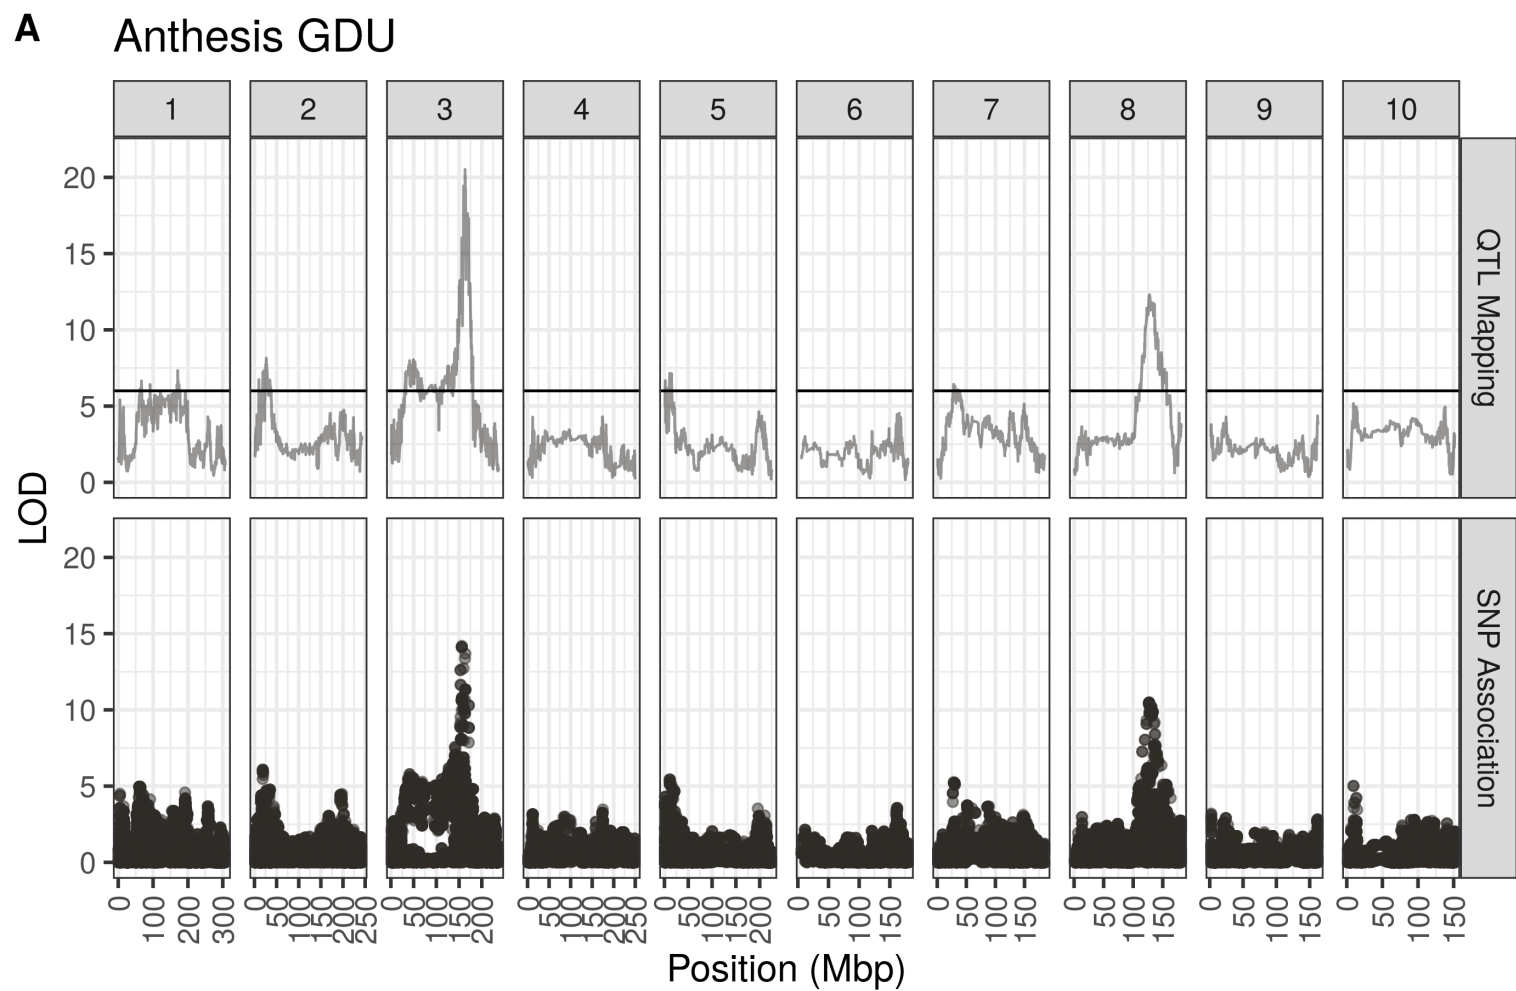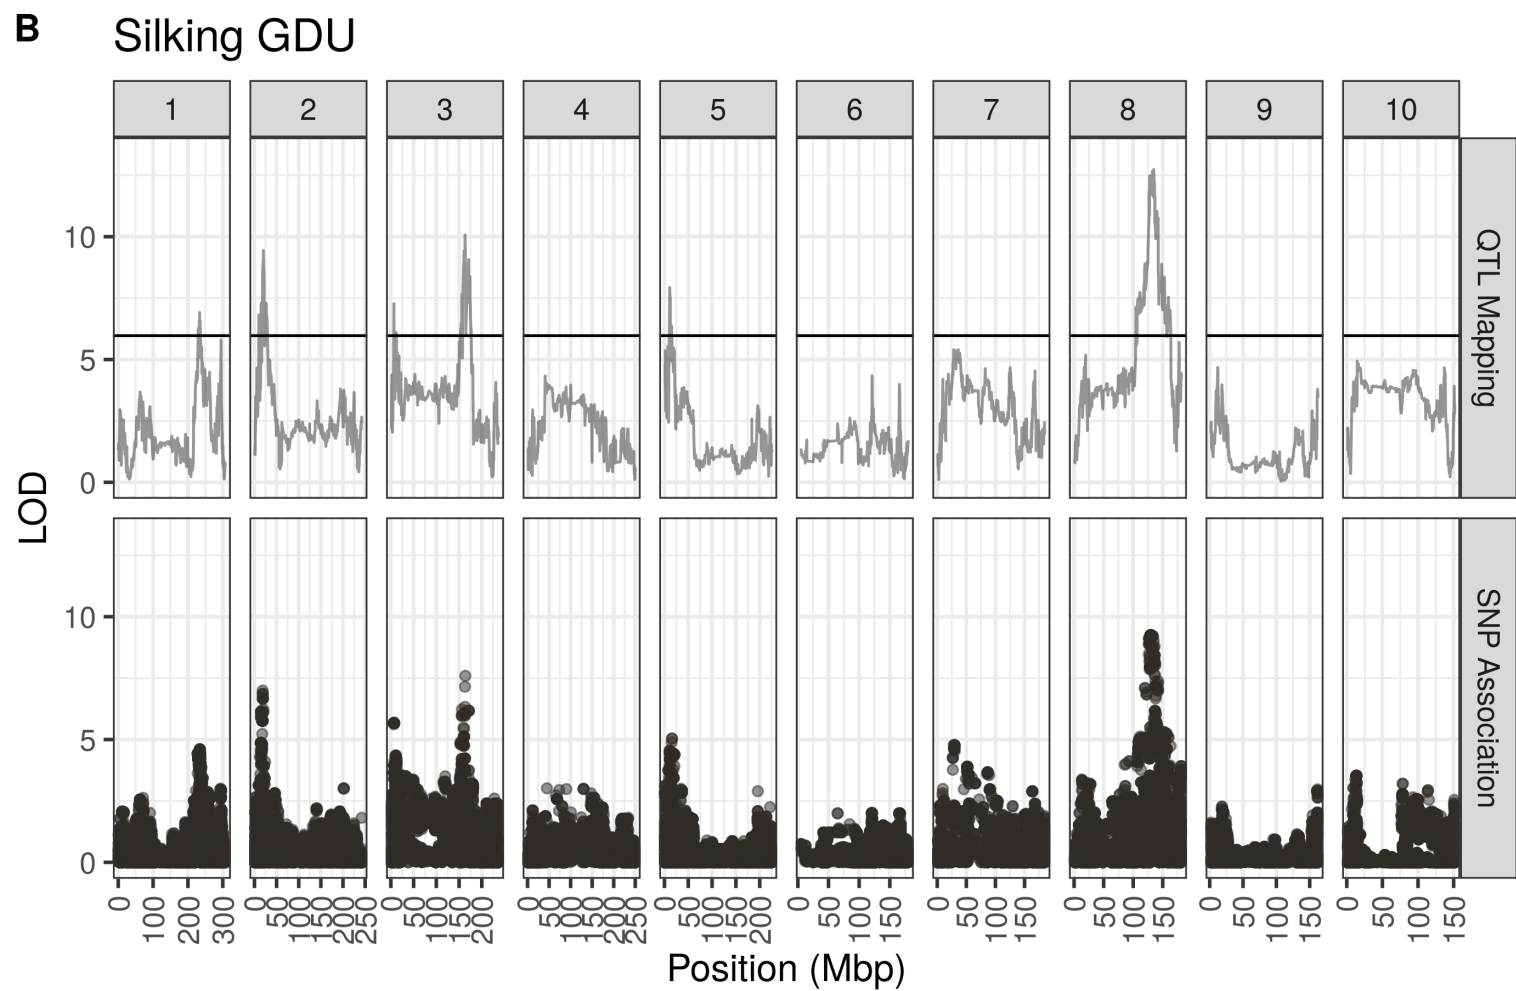



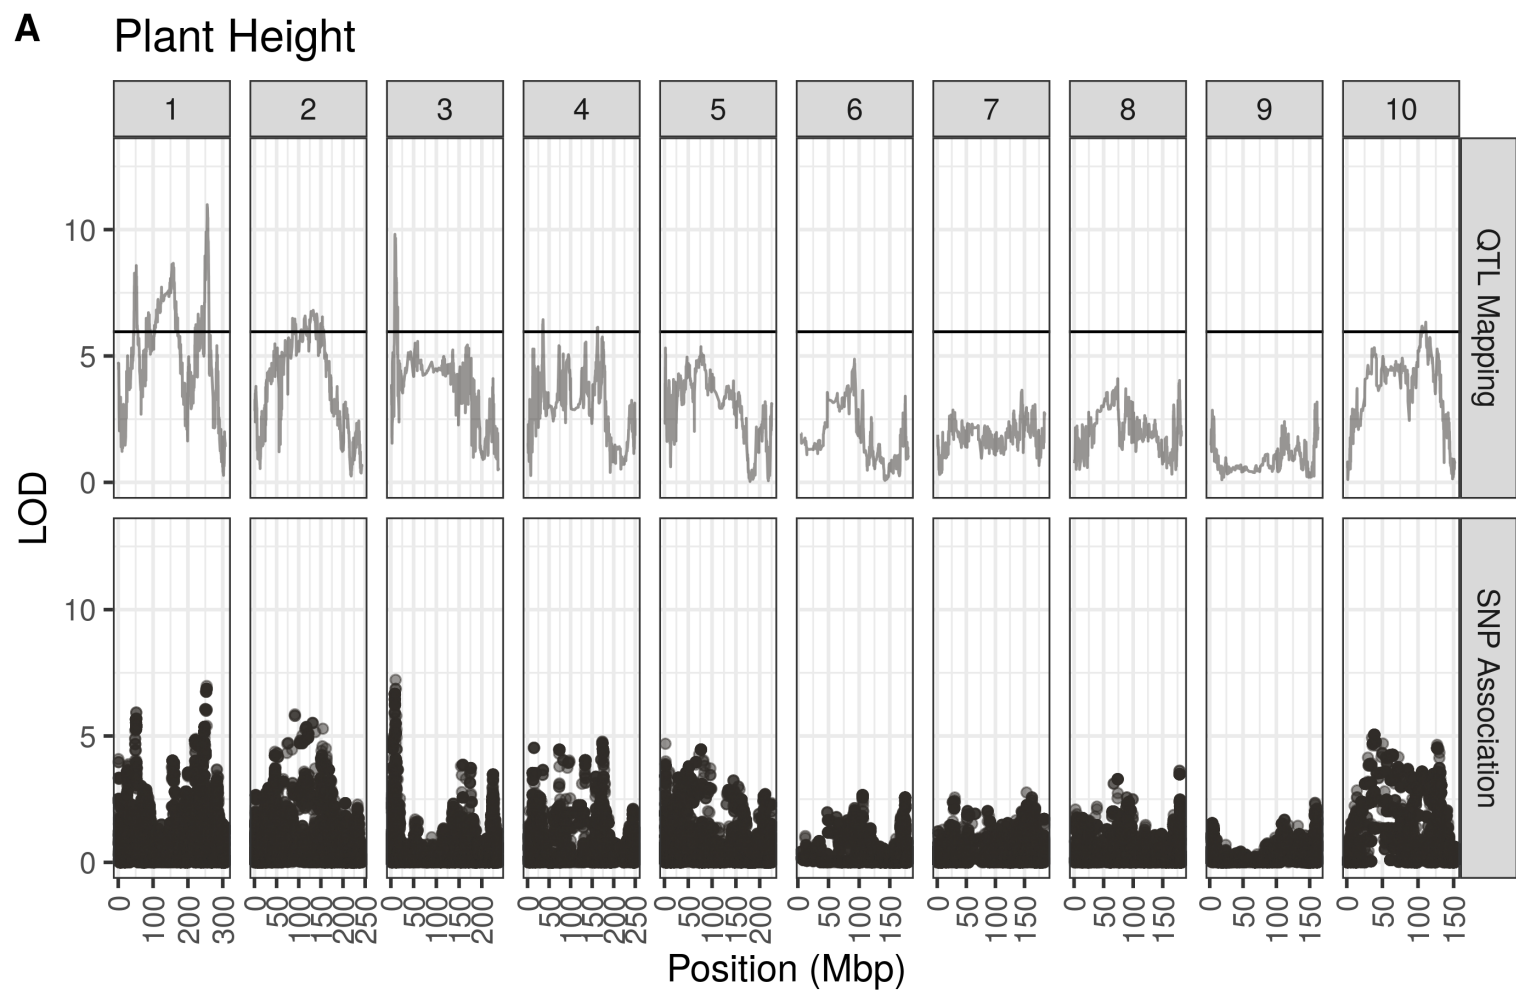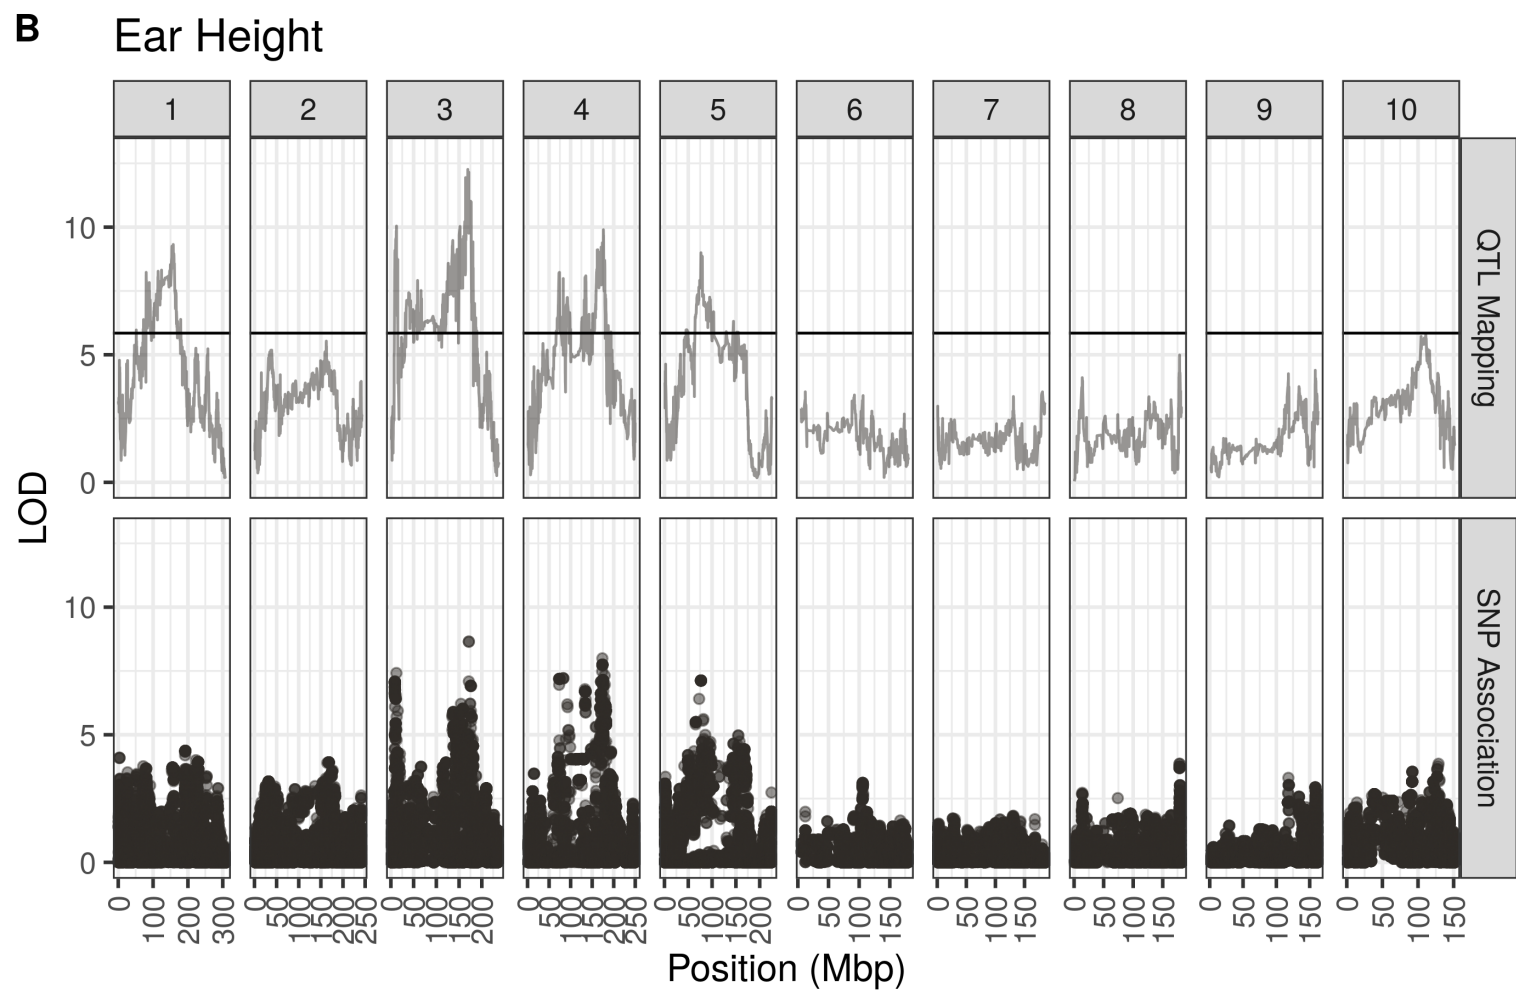

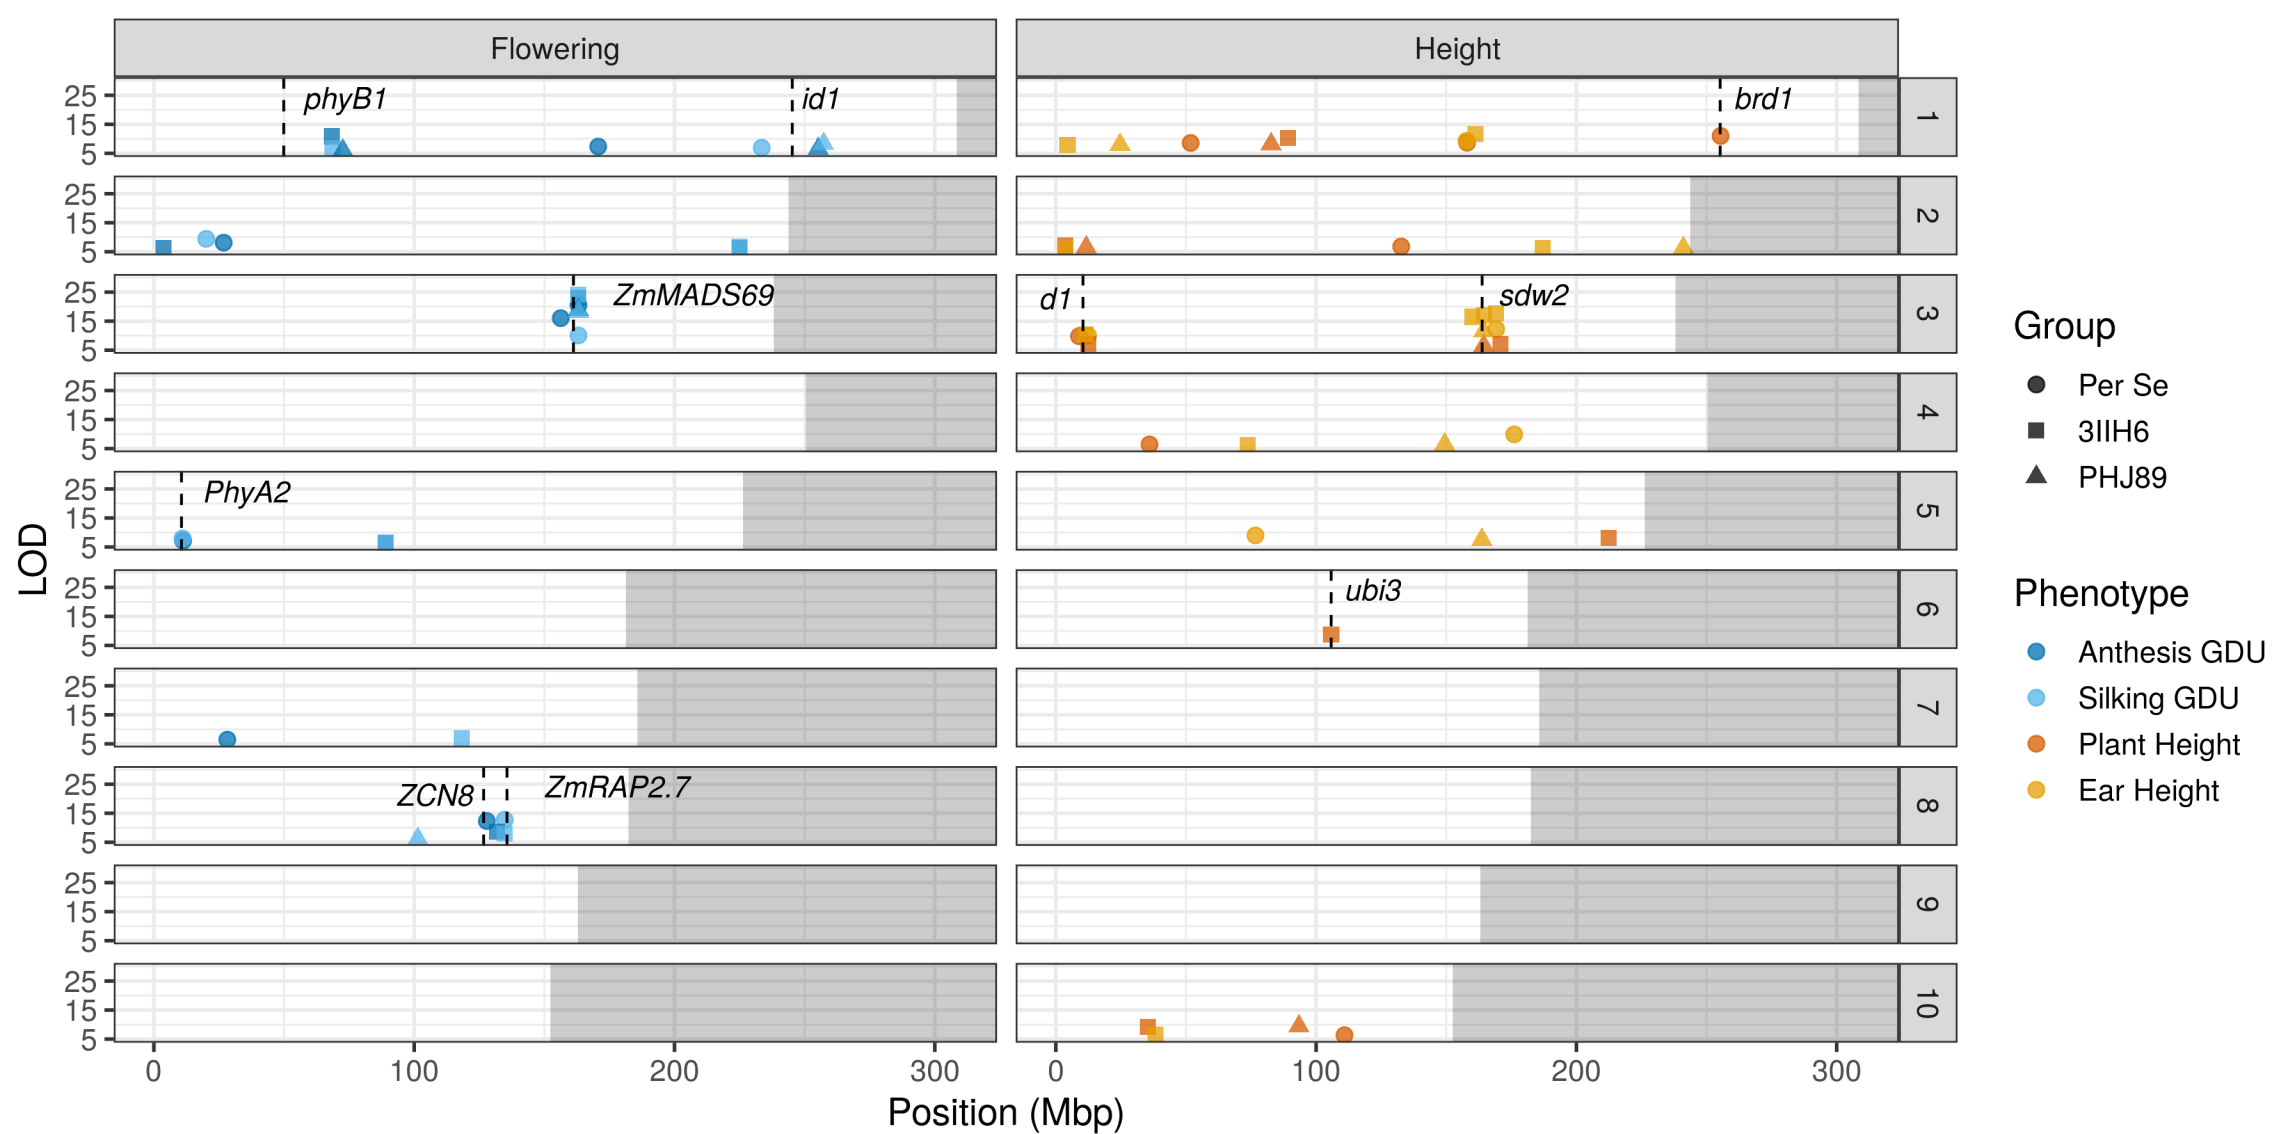

Plant Height BLUP Effect

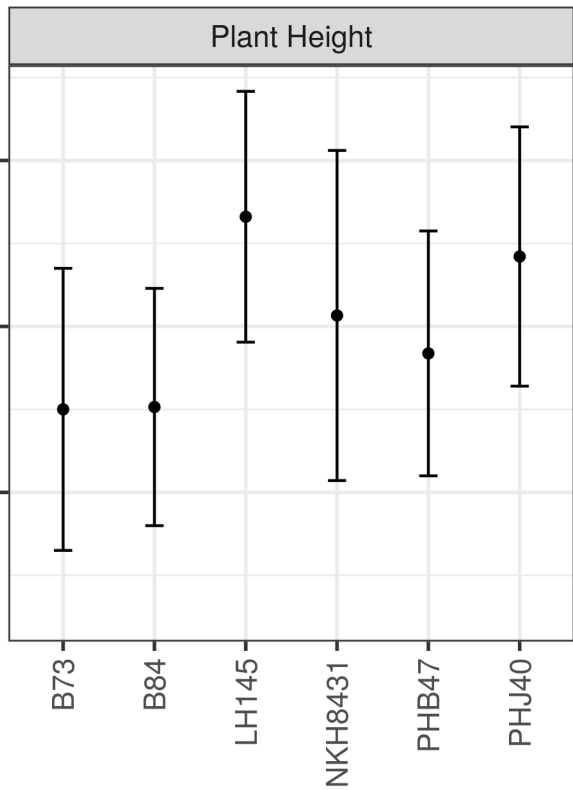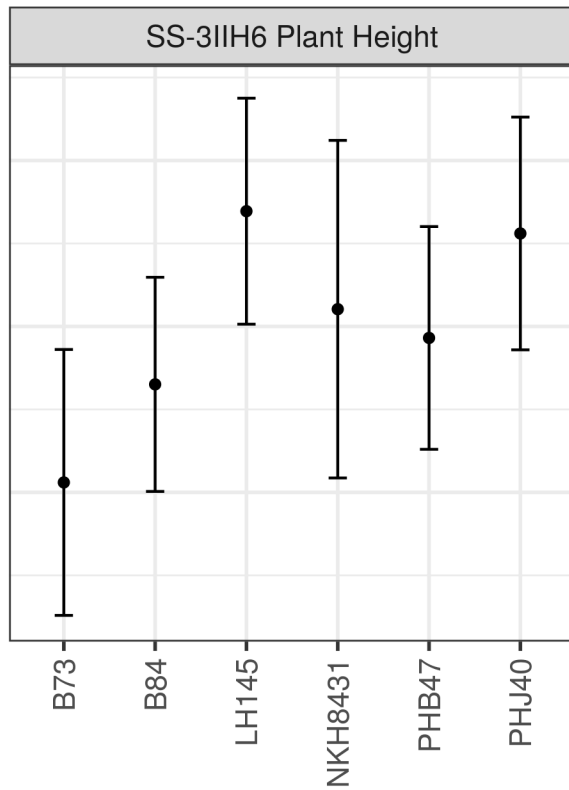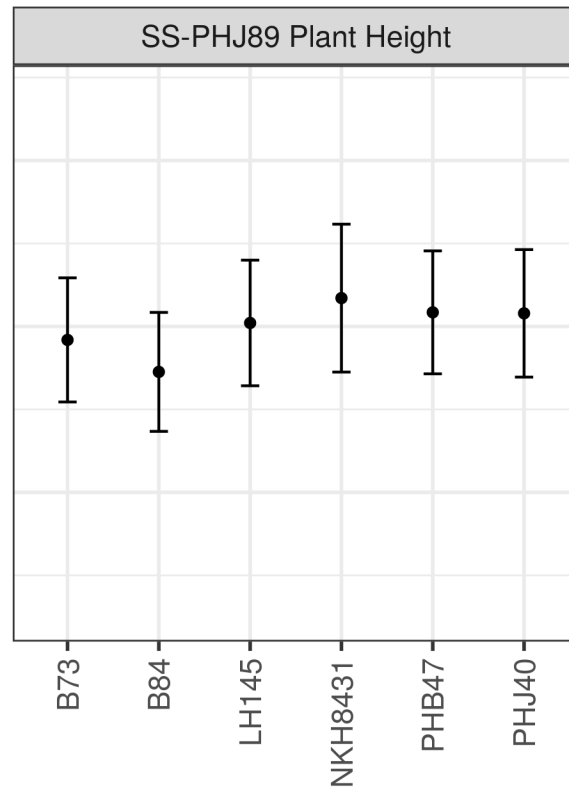

Founder

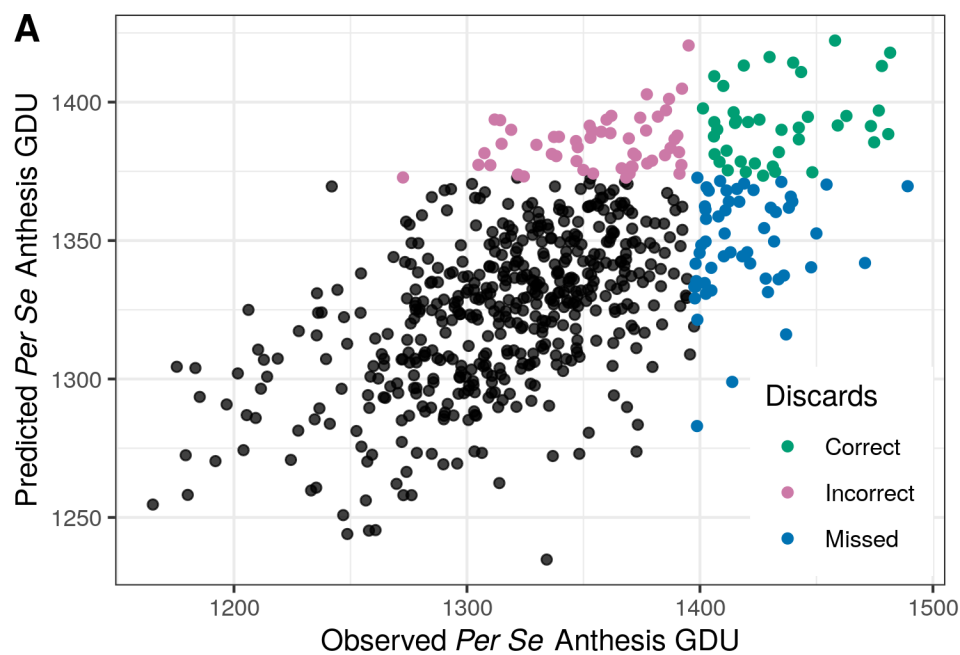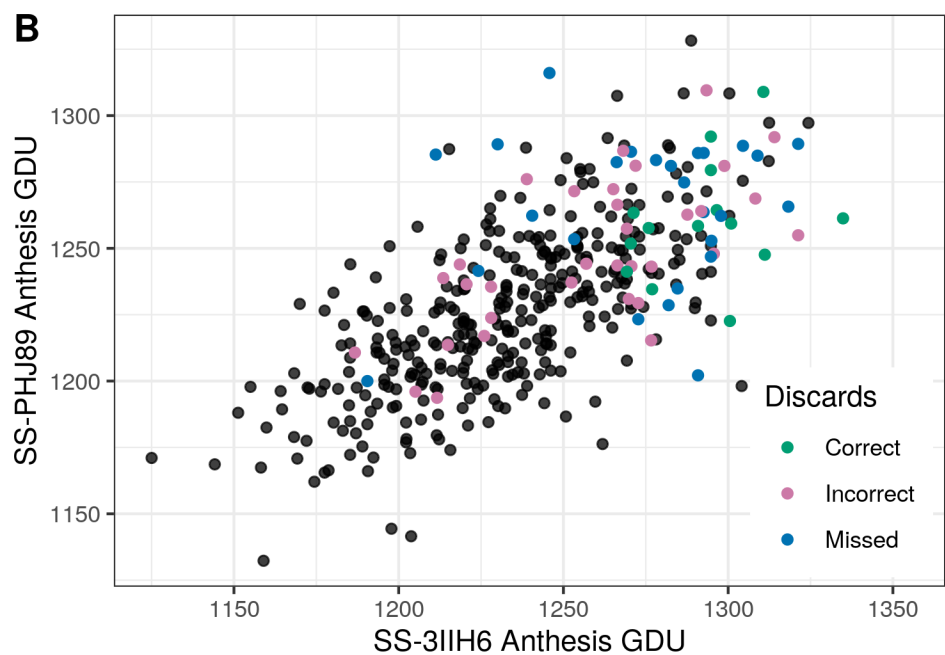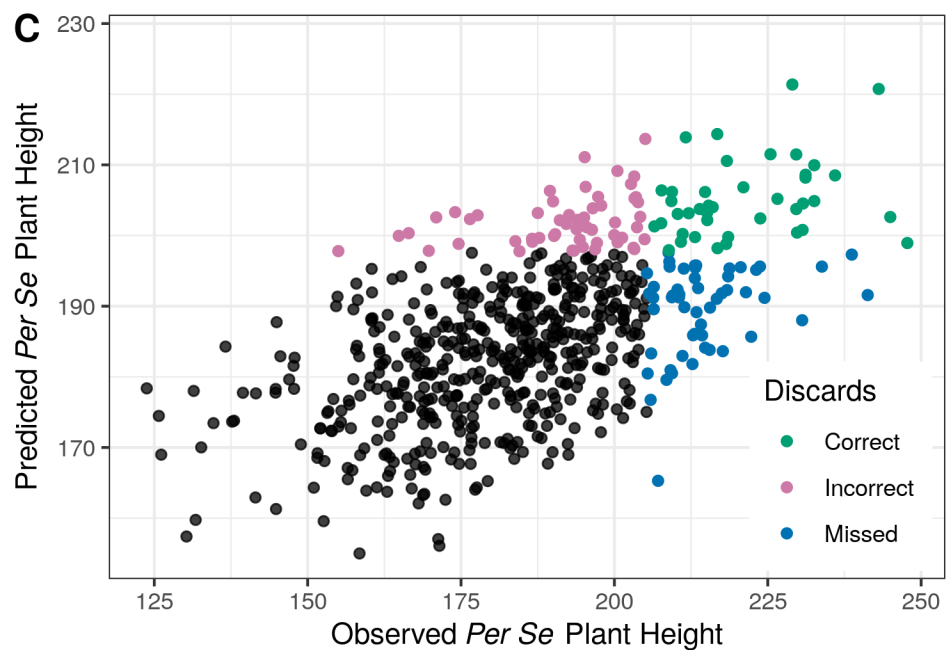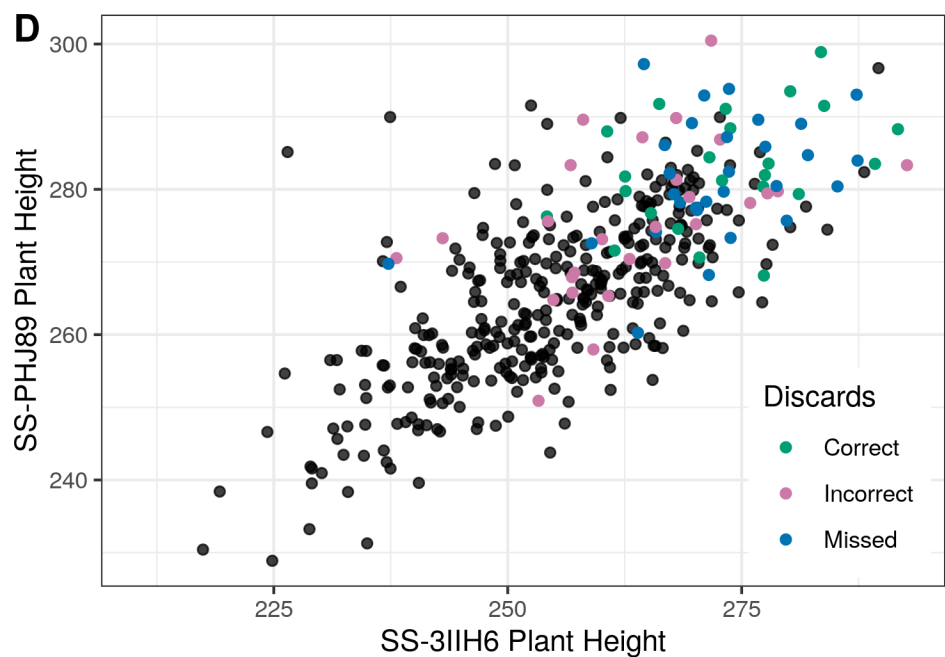

# Interaction of Per Se Anthesis GDU Peaks- Chromosome 3 (Top) by Chromosome 8 (Side)

Population Mean (red point) = 1334.57; Total individuals = 594

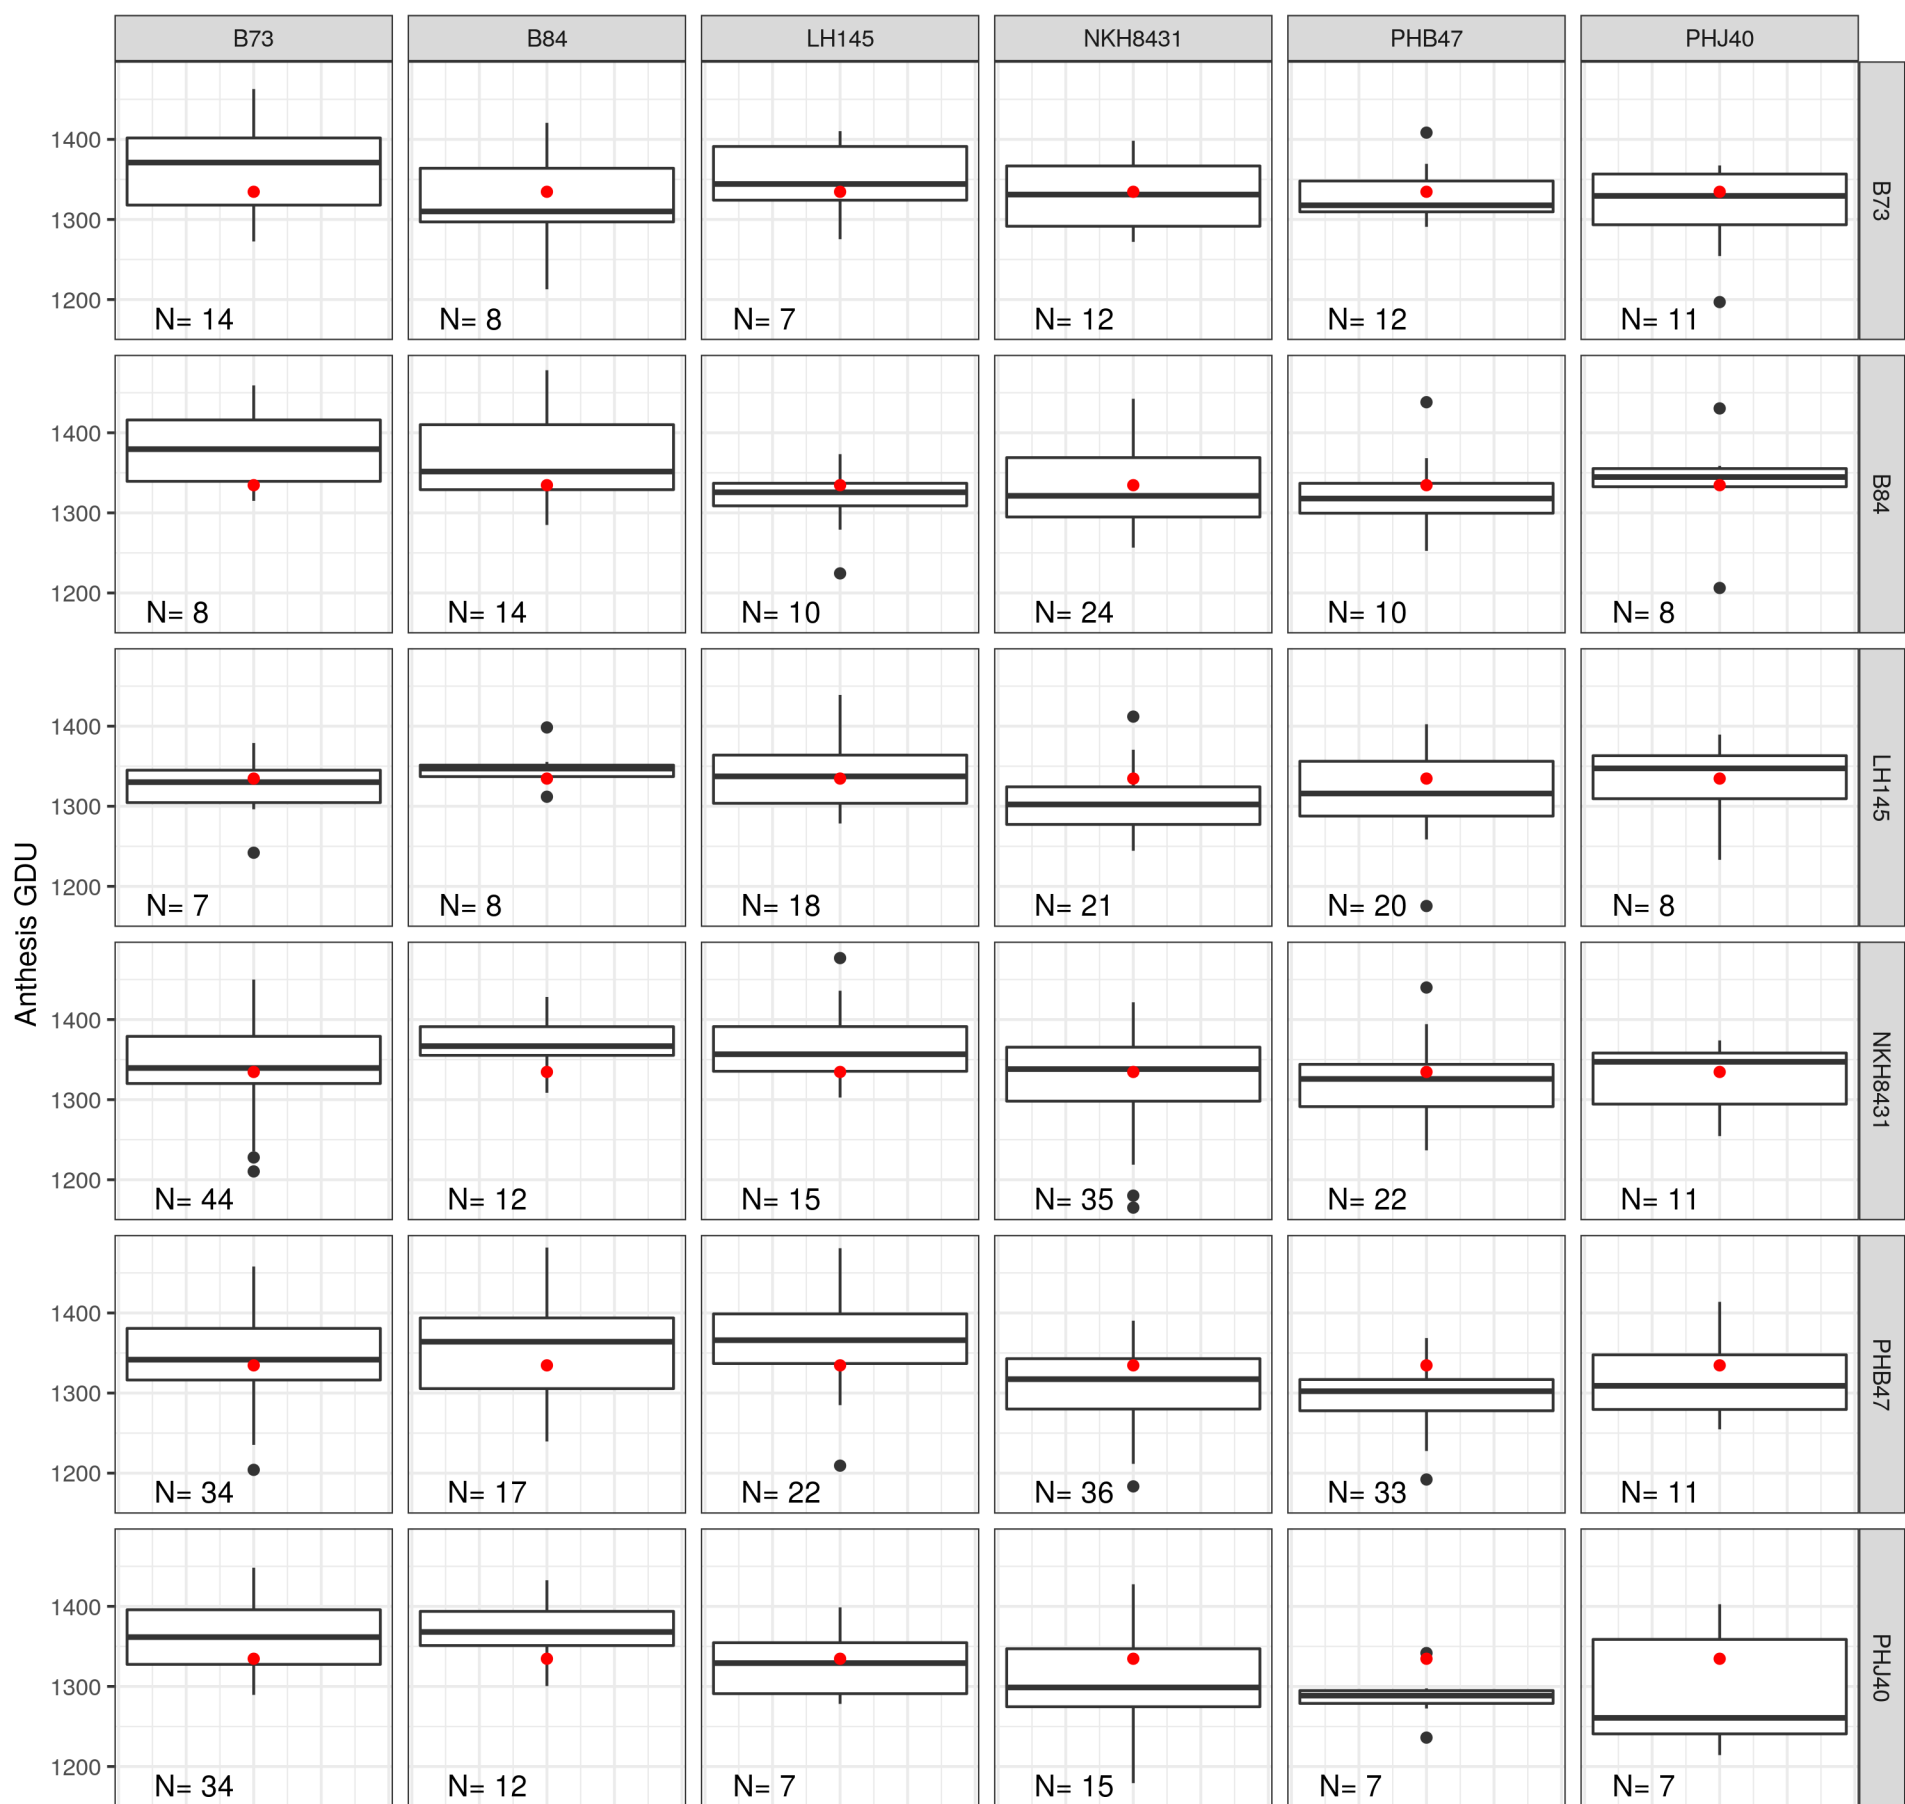

# Interaction of SS-3IIH6 Plant Height Peaks- Chromosome 1 (Side) by Chromosome 6 (Top)

Population Mean (red point) = 258.61; Total individuals = 374

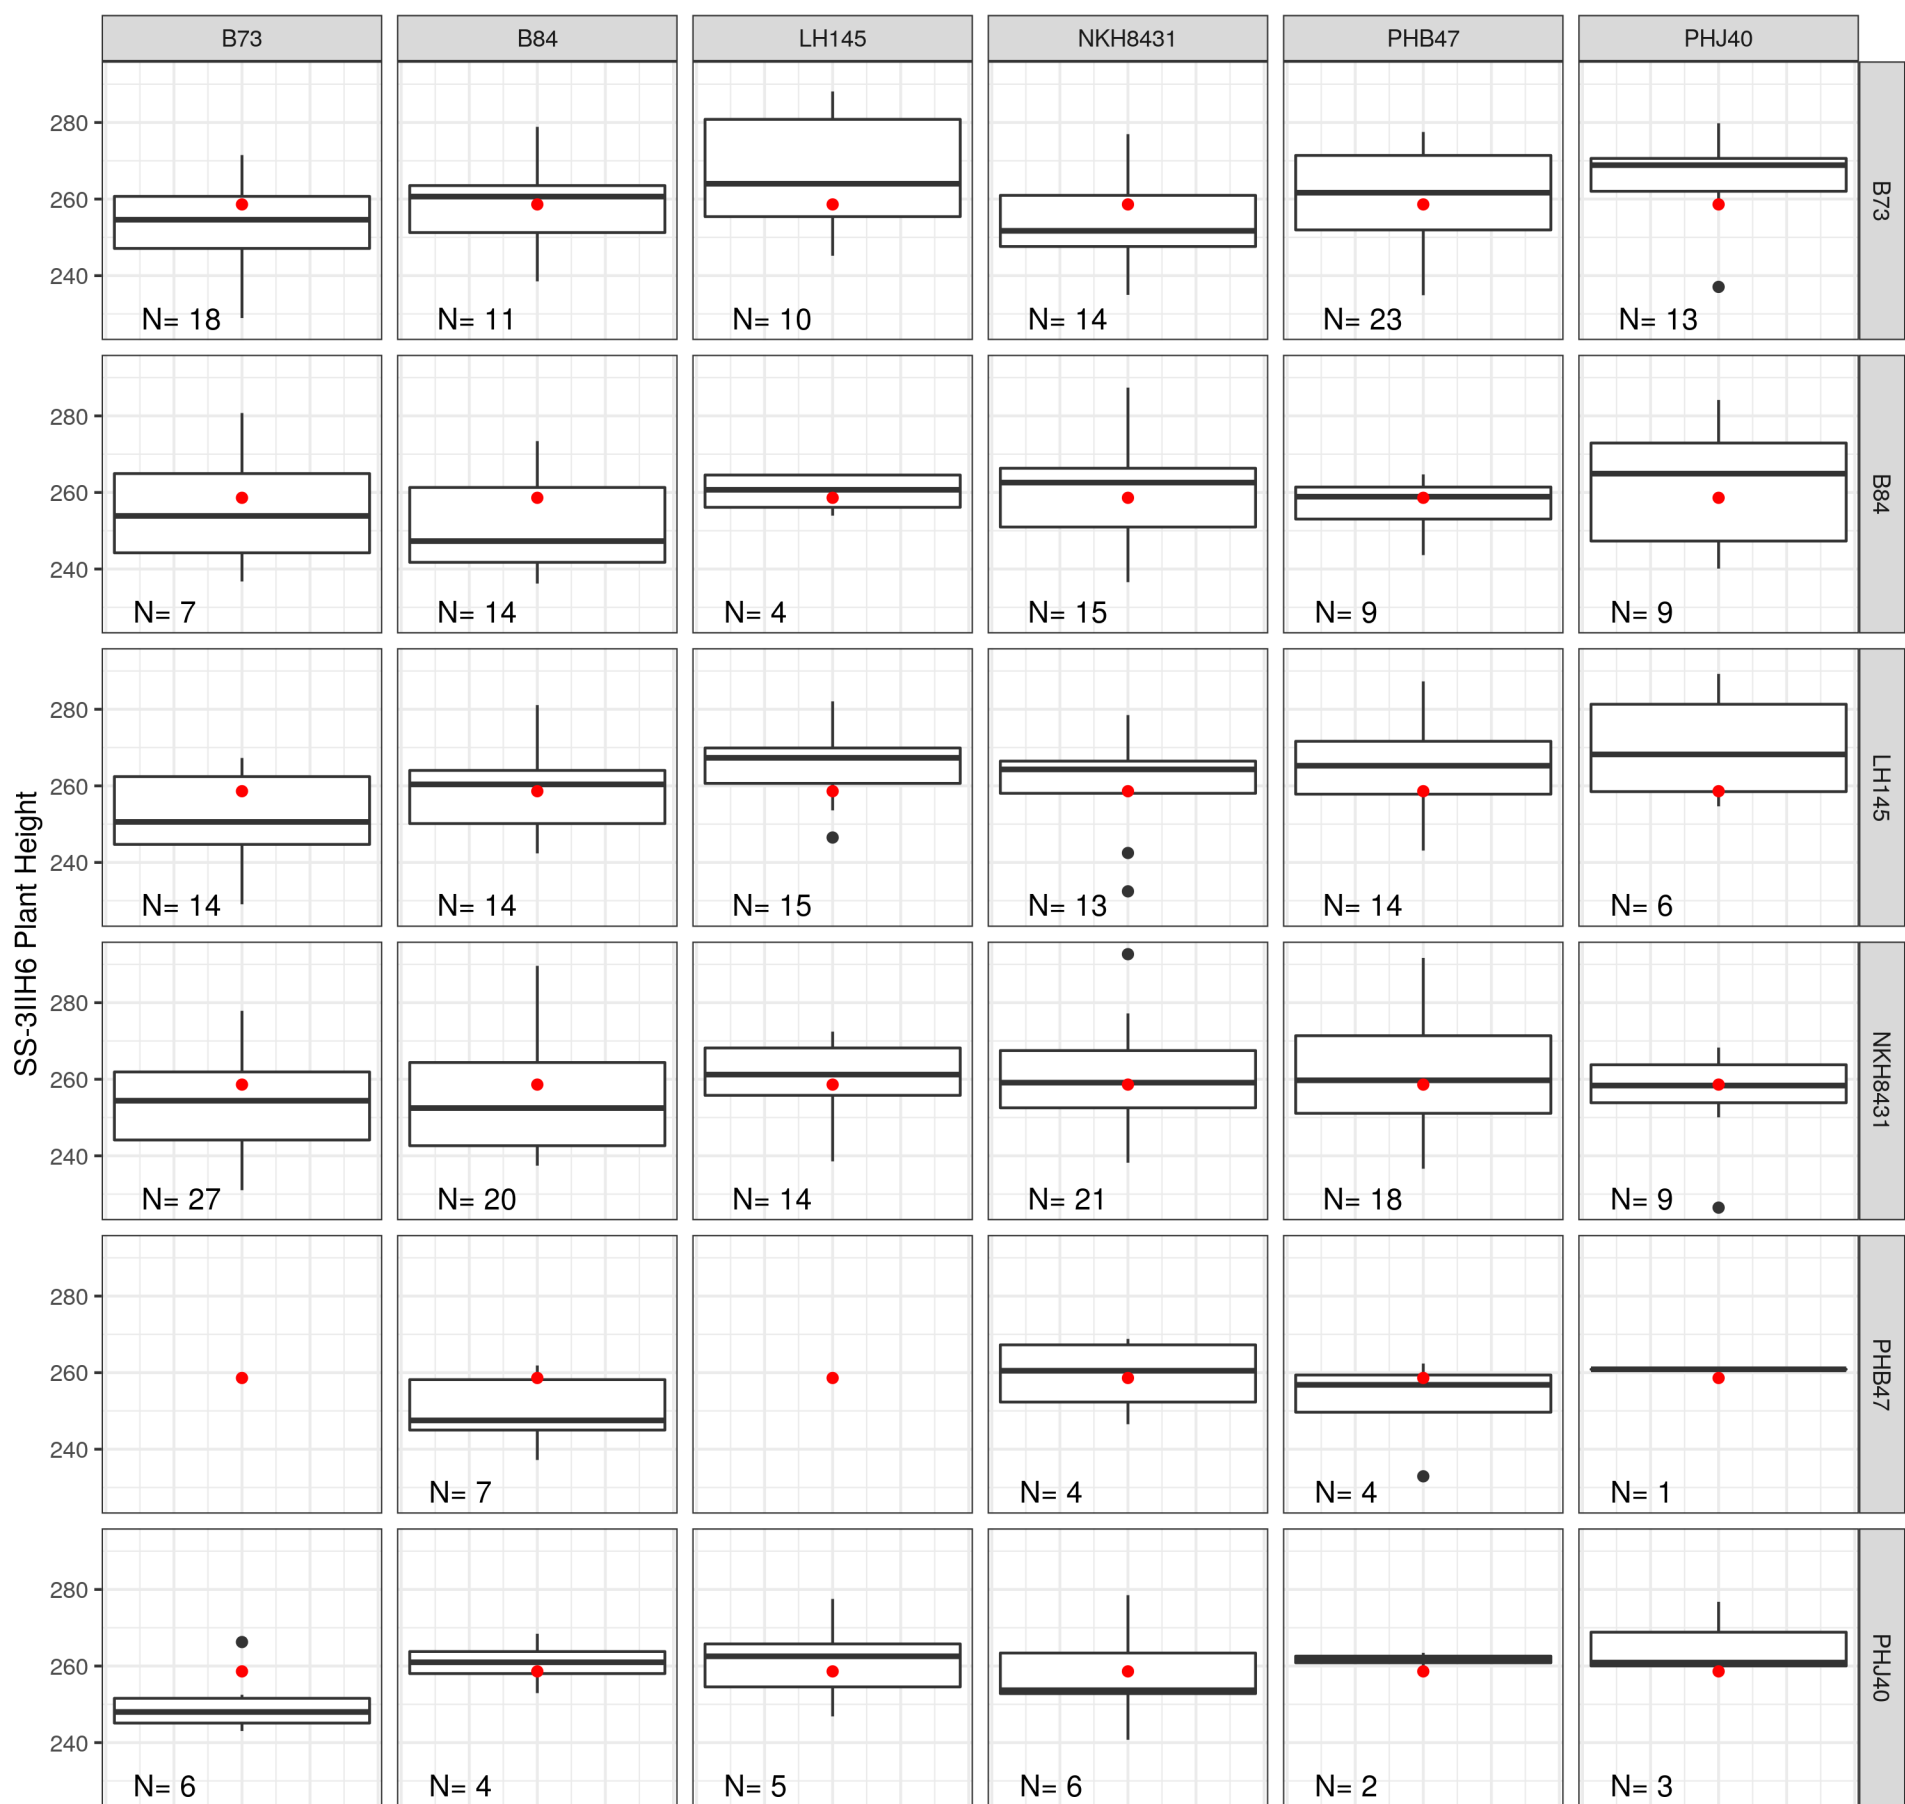

Source: https://www.biorxiv.org/content/10.1101/2022.01.31.478539v1.full.pdf
